# Supplementary material
Source: publisher figshare collection journal article supplement (https://springernature.figshare.com/ndownloader/files/31625451)
Supplement: Supplementary file 1 [file 31625451]

## Sheet: data
questionnaire_number	ID	country	bio	course	age	sex	bio_classes	interest_bio	meaning_evo	learn_evo	denomination	denom_summarized	KAEVO A1	KAEVO A2	KAEVO A3	KAEVO A4	KAEVO A5	KAEVO A6	KAEVO A7	KAEVO A8	KAEVO A9.1	KAEVO A9.2	KAEVO A10	KAEVO A11	ATEVO E1	ATEVO E2	ATEVO E3	ATEVO E4	ATEVO E5	ATEVO E6	ATEVO E7	ATEVO E8	PERF F1	PERF F2	PERF F3	PERF F4	PERF F5	PERF F6	PERF F7	PERF F8	PERF F9	PERF F10
271	GR_AL_271	11	2	3	17	2	5	3	3	1	4	4	0	1	0	0	0	0	0	1	1	0	1	0	5	5	4	3	3	3	3	4	4	5	2	5	3	3	5	4	5	3
272	GR_AL_272	11	2	3	18	1	5	5	5	1	4	4	1	0	1	0	0	1	1	1	0	0	0	1	4	2	4	4	4	4	4	4	4	4	4	3	2	3	2	4	2	1
273	GR_AL_273	11	2	3	18	2	5	7	5	1	4	4	0	0	0	0	0	0	1	1	0	0	0	1	1	5	1	5	4	1	2	1	5	5	5	99	3	3	2	2	1	2
274	GR_AL_274	11	2	3	18	2	5	7	5	1	4	4	0	0	1	1	1	0	1	1	0	1	0	0	5	3	5	4	5	4	5	3	5	5	5	1	3	3	4	4	4	2
275	GR_AL_275	11	2	3	19	1	5	5	5	1	4	4	1	0	1	0	1	1	1	0	0	0	0	0	5	1	4	1	5	4	4	1	5	5	5	5	4	5	5	5	5	4
276	GR_AL_276	11	2	3	18	1	4	7	5	1	4	4	0	0	1	0	1	0	1	1	0	1	0	0	5	4	5	5	5	1	5	1	1	1	1	2	1	1	2	1	1	1
277	GR_AL_277	11	2	3	18	2	5	5	4	1	4	4	1	0	1	0	1	0	1	0	0	0	0	0	5	4	5	4	5	4	5	3	5	5	5	4	4	5	5	4	5	3
278	GR_AL_278	11	2	3	18	2	4	99	4	1	4	4	0	0	0	0	0	1	1	1	0	0	0	1	5	5	4	5	4	4	1	2	5	5	4	5	3	5	4	4	4	3
279	GR_AL_279	11	2	3	99	2	4	99	4	1	4	4	0	0	0	0	0	1	1	0	0	0	0	1	5	5	4	5	4	4	1	2	5	4	4	4	3	5	4	3	3	4
280	GR_AL_280	11	2	3	18	2	5	6	5	1	4	4	0	1	0	0	0	0	1	1	0	0	0	0	5	4	4	1	5	1	5	4	3	3	1	1	1	1	1	1	1	1
281	GR_AL_281	11	2	3	18	2	5	4	3	1	4	4	1	0	0	0	0	0	0	0	0	0	0	1	4	99	99	99	99	99	99	99	5	3	3	5	3	5	3	3	2	4
282	GR_AL_282	11	2	3	18	2	5	6	5	1	4	4	0	0	0	0	1	1	0	0	0	0	1	0	5	4	5	5	4	4	4	4	2	2	2	2	2	2	2	2	2	2
284	GR_AL_284	11	2	3	19	2	4	2	4	1	4	4	0	0	0	0	0	0	1	1	0	0	0	1	4	3	5	4	5	3	5	5	3	5	4	1	1	5	4	1	2	1
285	GR_AL_285	11	2	3	99	2	2	6	3	1	4	4	0	0	1	0	0	0	1	0	0	0	1	0	5	5	5	5	4	4	5	3	4	5	4	3	2	5	4	4	4	3
286	GR_AL_286	11	2	3	18	2	4	2	3	1	4	4	0	0	0	0	1	0	1	1	0	0	1	0	5	3	4	4	4	3	4	4	5	5	5	3	3	3	5	5	3	3
287	GR_AL_287	11	2	3	99	2	5	4	3	1	4	4	1	1	0	1	1	1	0	0	0	0	0	0	5	4	5	4	1	3	5	5	4	3	5	3	4	3	2	3	3	3
288	GR_AL_288	11	2	3	18	2	5	99	2	2	4	4	0	0	0	0	0	1	0	1	0	0	0	0	3	5	3	2	5	5	5	4	3	1	2	3	2	2	2	2	2	1
289	GR_AL_289	11	2	3	18	2	5	2	3	1	4	4	0	0	0	0	0	0	1	1	0	0	0	0	1	5	3	5	4	99	5	3	4	4	3	3	1	1	3	3	3	3
290	GR_AL_290	11	2	3	18	2	5	5	3	1	4	4	0	0	0	0	0	0	1	1	0	0	0	0	5	3	4	4	4	4	3	4	4	3	5	4	3	3	2	1	2	1
291	GR_AL_291	11	2	3	17	2	5	99	3	1	4	4	0	0	0	0	1	0	1	1	0	0	0	1	5	1	5	3	4	3	4	3	5	5	5	5	2	5	5	5	2	2
292	GR_AL_292	11	2	3	18	2	5	4	5	1	4	4	0	1	0	0	0	0	1	1	0	0	0	0	5	4	5	5	4	3	4	5	4	4	4	4	3	3	3	3	3	3
293	GR_AL_293	11	2	3	17	2	5	4	5	1	4	4	0	0	1	0	0	1	1	1	0	1	99	0	5	1	5	4	5	1	5	1	5	5	3	4	3	5	5	4	4	3
294	GR_AL_294	11	2	3	18	2	5	99	3	1	4	4	0	1	0	1	0	0	1	1	0	0	0	0	5	3	4	1	5	2	4	1	5	5	5	5	4	4	5	4	3	2
295	GR_AL_295	11	2	3	18	2	5	5	3	1	4	4	0	0	1	0	1	1	0	0	0	1	0	0	5	3	5	3	5	1	5	3	5	5	5	4	3	4	4	4	4	4
296	GR_AL_296	11	2	3	18	2	5	3	3	1	4	4	0	0	0	0	0	0	1	1	0	0	0	1	5	4	5	5	5	3	5	5	5	5	4	5	3	4	5	3	4	3
297	GR_AL_297	11	2	3	18	2	5	5	3	1	4	4	0	0	0	0	0	0	0	0	0	0	0	0	5	4	4	2	4	5	4	2	5	5	5	5	4	5	4	5	4	4
298	GR_AL_298	11	2	3	18	2	5	3	5	1	4	4	0	0	0	0	0	0	1	0	0	0	0	0	5	4	3	1	5	2	5	2	5	5	5	4	4	5	5	4	5	3
299	GR_AL_299	11	2	3	17	1	5	4	3	1	4	4	0	99	0	0	0	0	99	0	0	0	0	0	4	4	5	4	4	3	5	4	5	5	5	5	5	5	4	3	5	4
300	GR_AL_300	11	2	3	18	1	5	1	2	2	4	4	1	0	0	1	0	0	1	1	0	0	0	0	5	5	5	1	5	5	5	2	5	5	5	5	4	5	5	5	5	5
301	GR_AL_301	11	2	3	18	2	4	5	4	2	4	4	0	1	0	0	1	0	0	0	0	0	0	0	5	5	4	5	4	4	4	2	5	4	4	4	3	4	5	5	5	4
302	GR_AL_302	11	2	3	18	2	5	2	3	1	4	4	0	0	0	0	0	0	1	0	0	0	0	1	4	4	3	3	2	4	3	5	5	5	4	4	4	5	4	3	2	4
303	GR_AL_303	11	2	3	18	2	5	6	4	1	4	4	0	0	0	0	0	0	1	1	0	0	0	1	4	2	5	2	5	4	5	4	5	5	5	4	5	5	5	5	5	5
305	GR_AL_305	11	2	3	19	2	5	5	4	1	4	4	0	1	0	0	0	0	0	0	0	0	0	0	5	3	5	3	4	4	4	3	5	5	5	4	4	4	5	5	5	5
306	GR_AL_306	11	2	3	99	2	5	2	3	3	4	4	0	0	0	0	1	0	0	0	0	0	0	0	5	5	3	2	4	4	3	1	1	2	4	3	1	4	3	2	4	1
307	GR_AL_307	11	2	3	18	2	5	4	5	1	4	4	0	0	0	0	0	0	1	99	0	0	0	0	4	3	5	2	4	3	2	4	5	3	4	4	1	3	2	4	1	3
308	GR_AL_308	11	2	3	17	2	5	6	5	1	4	4	0	0	0	0	0	0	1	1	1	0	1	0	5	3	5	3	5	5	4	5	5	4	4	4	4	5	4	2	5	2
309	GR_AL_309	11	2	3	18	2	5	4	4	3	11	11	0	0	1	0	0	0	0	0	0	0	1	0	5	4	5	2	1	3	5	3	1	1	1	1	1	1	1	1	1	1
310	GR_AL_310	11	2	3	18	2	5	2	4	1	4	4	0	0	0	0	0	0	1	0	0	0	0	0	5	1	4	5	4	1	4	3	1	2	2	1	1	2	1	1	1	1
311	GR_AL_311	11	2	3	18	2	5	1	3	1	4	4	0	0	0	0	1	0	1	0	0	0	1	0	4	2	4	4	1	4	4	5	5	5	5	5	5	5	4	5	5	4
312	GR_AL_312	11	2	3	19	2	5	5	3	1	4	4	0	0	0	0	0	0	1	1	0	0	1	0	5	5	5	4	4	4	5	3	5	5	5	5	1	5	4	4	3	4
313	GR_AL_313	11	2	3	19	2	5	4	2	2	4	4	0	0	0	0	0	0	99	0	0	0	0	0	4	5	99	2	1	5	4	2	5	5	4	4	99	4	99	3	4	5
314	GR_AL_314	11	2	3	18	2	5	5	5	1	4	4	1	0	0	0	0	0	99	0	0	0	0	0	3	5	3	3	4	2	1	1	5	5	5	4	4	5	5	5	5	5
315	GR_AL_315	11	2	3	18	2	5	5	4	1	4	4	0	0	0	1	0	0	1	1	1	0	0	0	5	3	4	3	5	2	5	4	5	5	5	4	2	5	4	3	3	2
316	GR_AL_316	11	2	3	17	2	5	7	5	1	4	4	99	0	99	0	1	0	0	0	0	0	0	0	5	5	5	3	5	5	5	3	5	5	5	3	3	5	5	3	3	3
317	GR_AL_317	11	2	3	18	2	5	4	3	1	4	4	0	1	0	0	0	0	0	0	0	0	0	0	4	5	4	3	2	5	3	4	5	5	4	4	5	3	4	5	3	4
318	GR_AL_318	11	2	3	18	2	5	4	3	1	4	4	0	1	0	0	0	0	0	0	0	0	0	0	4	2	2	3	5	99	3	1	5	5	4	4	1	3	5	5	2	3
319	GR_AL_319	11	2	3	18	2	5	5	4	1	4	4	0	0	0	0	0	0	1	0	0	0	0	0	5	5	5	5	5	5	5	5	5	5	3	4	2	5	1	4	5	2
320	GR_AL_320	11	2	3	18	2	5	5	3	1	4	4	0	0	0	0	0	0	0	0	0	0	0	0	5	5	4	5	5	1	5	4	5	5	5	4	5	5	5	5	1	5
321	GR_AL_321	11	2	3	18	2	4	3	3	1	4	4	0	0	0	0	0	0	0	1	0	0	0	0	5	5	4	5	5	4	5	5	5	5	5	4	4	5	5	5	3	4
322	GR_AL_322	11	2	3	17	2	5	1	5	1	4	4	0	0	0	0	0	0	1	1	0	0	0	0	4	3	5	3	5	1	5	1	4	4	4	5	5	5	5	5	5	4
323	GR_AL_323	11	2	3	18	2	5	5	3	1	4	4	0	0	0	0	0	0	1	1	0	0	0	0	5	5	5	5	5	4	4	5	5	5	5	5	5	5	5	5	2	5
325	GR_AL_325	11	2	3	18	2	5	5	5	1	4	4	0	1	0	0	0	0	1	1	0	0	1	0	5	5	5	2	5	5	4	2	5	4	5	4	4	2	5	4	2	5
326	GR_AL_326	11	2	3	18	2	5	5	5	1	4	4	1	0	1	0	1	0	1	0	0	0	0	1	4	5	4	5	5	5	5	5	4	5	5	4	3	3	4	3	4	5
327	GR_AL_327	11	2	3	18	2	5	5	3	1	4	4	1	0	1	0	1	0	1	1	0	0	0	0	5	4	4	1	4	3	3	2	5	5	4	5	5	5	5	5	5	5
328	GR_AL_328	11	2	3	18	2	5	5	3	1	4	4	0	0	1	0	0	0	1	1	0	0	0	0	5	5	4	5	5	4	5	5	2	1	1	3	1	2	1	1	1	1
329	GR_AL_329	11	2	3	99	2	5	5	5	1	12	12	0	0	0	0	0	0	1	1	0	0	99	0	99	99	99	99	99	99	99	99	99	99	99	99	99	99	99	99	99	99
330	GR_AL_330	11	2	3	18	2	5	4	3	1	4	4	0	0	0	0	0	0	0	0	0	0	1	0	1	1	1	3	4	1	1	1	5	5	5	5	5	5	5	5	5	4
331	GR_AL_331	11	2	3	18	1	5	99	2	1	4	4	0	0	0	0	0	0	1	1	0	0	0	1	5	5	3	2	2	4	4	1	5	5	5	4	5	5	5	5	5	5
332	GR_AL_332	11	2	3	18	2	4	2	3	1	4	4	0	0	0	0	0	0	1	1	0	0	0	0	4	4	5	2	5	5	5	2	5	5	5	5	5	5	5	5	4	5
333	GR_AL_333	11	2	3	18	2	4	4	3	1	4	4	99	0	0	0	0	0	1	1	1	0	0	0	4	4	5	2	5	5	5	2	5	5	5	5	5	5	5	5	5	5
334	GR_AL_334	11	2	3	18	1	4	5	3	3	4	4	0	99	0	1	0	0	0	0	0	0	0	0	4	4	3	1	3	1	1	5	99	99	99	99	99	99	99	99	99	99
335	GR_AL_335	11	2	3	18	1	2	3	3	2	4	4	1	1	1	0	1	1	1	0	0	0	1	0	5	5	5	4	99	4	5	1	5	5	5	4	2	5	5	5	5	4
336	GR_AL_336	11	2	3	19	2	4	7	4	1	4	4	0	0	0	0	0	1	1	1	0	0	0	1	99	4	4	2	4	99	3	3	5	5	5	5	5	3	5	5	1	3
337	GR_AL_337	11	2	3	18	2	5	99	5	1	4	4	0	0	0	1	0	0	1	1	0	0	0	0	1	5	4	2	5	1	5	3	3	3	3	3	3	3	3	3	3	3
338	GR_AL_338	11	2	3	19	1	5	5	5	1	4	4	0	0	0	0	0	0	0	0	0	0	0	1	99	99	99	99	99	99	99	99	99	99	99	99	99	99	99	99	99	99
339	GR_AL_339	11	2	3	18	1	5	5	5	1	4	4	0	0	0	0	0	0	1	1	0	0	1	0	5	1	4	3	5	2	5	3	5	3	3	4	3	3	3	3	3	3
340	GR_AL_340	11	2	3	18	1	5	4	5	1	4	4	1	0	0	0	0	0	1	0	0	0	0	0	4	3	5	3	5	3	4	4	5	5	4	4	3	4	5	3	5	3
341	GR_AL_341	11	2	3	18	2	5	6	3	1	4	4	0	0	0	0	0	0	1	1	0	0	0	1	4	4	4	4	4	4	4	4	5	5	5	5	5	5	5	5	5	5
342	GR_AL_342	11	2	3	18	1	5	99	4	1	4	4	1	0	1	0	1	1	1	0	0	0	0	1	2	4	5	3	5	3	4	3	5	5	4	3	1	1	1	1	1	1
343	GR_AL_343	11	2	3	18	2	4	4	5	1	4	4	0	1	0	0	0	0	1	0	0	0	0	0	4	5	5	3	5	4	5	4	5	5	5	5	2	3	4	4	3	4
344	GR_AL_344	11	2	3	99	2	5	99	5	1	4	4	0	0	1	0	1	1	1	1	0	0	0	0	5	4	5	5	4	1	3	3	5	5	5	5	5	5	5	5	5	4
345	GR_AL_345	11	2	3	17	2	5	4	3	1	4	4	0	0	0	0	0	0	1	1	0	0	0	0	5	4	2	4	5	4	5	1	4	4	5	4	2	3	3	3	2	4
346	GR_AL_346	11	2	3	18	2	5	99	3	1	4	4	0	0	0	0	0	0	0	0	0	1	0	0	5	4	3	2	2	5	3	4	5	5	4	5	5	5	5	5	5	5
347	GR_AL_347	11	2	3	18	2	5	4	5	1	4	4	0	0	1	0	0	0	1	0	0	0	0	0	5	4	4	3	5	4	4	4	5	4	4	4	4	4	4	3	3	4
348	GR_AL_348	11	2	3	17	2	5	5	3	1	4	4	0	0	1	0	0	0	1	0	0	0	99	1	5	5	1	1	5	4	5	1	5	5	5	5	5	5	4	5	4	4
349	GR_AL_349	11	2	3	18	2	5	5	3	1	4	4	0	0	0	0	0	0	1	0	0	0	0	1	5	5	5	3	5	5	5	5	5	5	5	3	5	5	4	5	3	4
350	GR_AL_350	11	2	3	18	2	5	4	3	1	4	4	0	0	0	0	0	0	1	1	0	0	0	0	4	3	4	3	4	1	2	4	5	5	5	5	4	5	5	4	5	4
351	GR_AL_351	11	2	3	18	2	5	4	3	1	4	4	0	0	0	0	0	0	1	0	0	0	1	0	5	4	4	5	5	3	5	5	5	5	4	4	4	5	5	5	5	5
352	GR_AL_352	11	2	3	18	2	5	99	4	1	4	4	0	0	0	0	0	0	1	1	0	0	0	1	2	3	4	4	5	4	4	3	5	5	5	5	5	4	4	5	4	4
353	GR_AL_353	11	2	3	18	2	1	99	4	1	4	4	0	0	0	0	0	0	1	1	0	0	0	1	4	5	4	2	4	2	3	3	5	4	4	4	2	3	4	4	2	2
354	GR_AL_354	11	2	3	18	2	5	99	3	2	4	4	0	0	0	0	0	0	1	0	0	0	0	0	4	3	4	4	2	5	4	1	5	4	4	4	5	2	4	4	3	4
355	GR_AL_355	11	2	3	20	2	4	4	5	1	4	4	0	0	0	0	0	0	1	0	1	0	0	1	4	5	3	3	4	4	4	2	5	5	5	4	3	5	5	4	3	2
356	GR_AL_356	11	2	3	18	2	5	5	4	1	4	4	0	0	0	0	0	0	1	0	0	0	0	99	5	3	4	4	4	5	5	3	5	5	5	5	4	5	5	5	4	4
357	GR_AL_357	11	2	3	18	1	5	99	5	1	4	4	0	0	0	0	0	0	1	0	0	0	0	0	5	3	5	5	4	5	5	4	5	3	3	2	2	3	2	3	2	4
359	GR_AL_359	11	2	3	18	1	5	99	3	1	4	4	0	0	0	0	0	0	1	0	0	0	0	1	5	3	5	3	5	1	5	3	5	5	5	3	4	4	3	5	5	4
360	GR_AL_360	11	2	3	18	2	5	2	5	1	11	11	0	0	0	0	0	0	0	0	0	0	0	0	5	5	4	3	5	5	4	4	1	1	1	1	1	1	1	1	1	1
361	GR_AL_361	11	2	3	18	2	5	7	5	1	4	4	0	0	0	0	0	0	1	1	1	0	0	0	5	5	2	2	5	4	2	4	3	4	2	2	3	1	2	2	1	1
362	GR_AL_362	11	2	3	19	3	5	7	5	1	13	12	1	0	0	0	0	0	0	1	0	1	0	0	3	3	2	2	3	5	4	5	3	3	3	3	3	3	3	3	3	3
363	GR_AL_363	11	2	3	18	2	5	1	3	1	4	4	0	0	0	0	0	0	1	1	1	0	0	0	5	4	4	3	5	3	5	5	5	5	5	4	5	5	5	5	5	5
364	GR_AL_364	11	2	3	18	2	5	4	3	1	4	4	0	0	0	0	0	0	0	0	0	0	0	1	4	3	3	3	4	3	4	5	5	5	3	5	2	5	4	4	3	3
365	GR_AL_365	11	2	3	18	2	5	3	3	1	4	4	0	0	1	0	0	0	1	1	0	0	0	0	5	4	5	2	5	4	5	2	1	1	1	1	1	1	1	1	1	1
366	GR_AL_366	11	2	3	18	2	4	6	4	1	4	4	1	0	1	0	1	1	1	1	0	0	0	0	2	5	5	4	5	4	4	5	5	5	5	5	4	5	5	5	5	2
367	GR_AL_367	11	2	3	18	2	5	99	5	1	4	4	0	0	1	0	0	1	1	1	0	0	0	1	5	5	5	2	5	5	5	1	5	5	5	4	5	5	5	5	5	5
368	GR_AL_368	11	2	3	17	2	5	7	5	1	4	4	0	0	1	0	1	0	1	0	0	0	1	0	1	1	5	4	4	3	5	4	2	3	1	4	1	1	1	1	1	1
370	SP_AC_370	23	2	4	18	2	3	5	5	1	99	99	0	0	1	0	1	1	0	0	0	0	1	0	5	4	3	4	5	4	5	5
372	SP_AC_372	23	2	4	23	1	4	6	5	1	99	99	1	0	1	0	1	1	1	1	0	0	1	1	5	5	5	5	5	5	5	5
373	SP_AC_373	23	2	4	18	1	5	7	5	1	99	99	1	0	1	0	1	0	1	1	0	0	1	1	4	3	4	2	4	4	4	4
374	SP_AC_374	23	2	4	17	2	3	1	2	2	99	99	1	0	1	0	1	1	0	0	0	0	0	0	3	3	3	3	3	3	3	3
375	SP_AC_375	23	2	4	18	2	4	4	5	2	99	99	1	0	1	0	1	0	1	1	0	0	1	1	5	4	2	1	5	2	5	1
376	SP_AC_376	23	2	4	19	1	4	5	5	1	99	99	1	0	1	0	1	1	1	1	0	0	1	0	5	5	5	2	5	2	5	3
377	SP_AC_377	23	2	4	17	1	3	99	5	1	99	99	0	0	0	0	0	0	0	0	0	0	0	1	5	5	5	4	5	2	5	5
378	SP_AC_378	23	2	4	18	1	3	5	4	3	99	99	1	1	0	1	0	1	0	0	0	0	1	1	5	4	4	4	4	2	5	3
379	SP_AC_379	23	2	4	18	1	3	4	5	1	99	99	0	0	1	0	1	0	99	99	99	99	99	99	99	99	99	99	99	99	99	99
380	SP_AC_380	23	2	4	18	1	3	1	2	3	99	99	0	0	0	0	0	0	1	0	0	0	1	0	4	5	4	3	2	2	3	3
381	SP_AC_381	23	2	4	18	2	5	6	4	1	99	99	1	0	1	1	1	1	1	1	0	0	1	0	1	4	4	4	5	2	5	5
382	SP_AC_382	23	2	4	18	2	4	5	3	1	99	99	1	0	1	0	0	1	1	1	0	0	1	0	5	3	4	3	4	4	4	3
384	SP_AC_384	23	2	4	19	2	3	6	4	1	99	99	0	0	0	1	1	0	1	0	0	0	0	0	5	5	5	1	5	5	5	5
385	SP_AC_385	23	2	4	18	1	3	99	5	1	99	99	0	1	1	1	1	0	1	1	0	0	1	1	5	5	4	5	2	5	4	2
386	SP_AC_386	23	2	4	18	2	4	99	3	1	99	99	0	0	0	0	1	0	1	1	0	0	0	99	99	99	99	99	99	99	99	99
387	SP_AC_387	23	2	4	19	2	3	1	5	1	99	99	0	0	0	1	1	0	1	0	0	0	0	0	5	2	4	3	2	4	5	1
388	SP_AC_388	23	2	4	17	1	3	99	5	1	99	99	1	0	0	0	0	0	0	0	0	0	0	1	99	99	99	99	99	99	99	99
389	SP_AC_389	23	2	4	20	1	3	4	4	1	99	99	0	0	99	0	0	1	1	1	0	0	99	1	99	99	99	99	99	99	99	99
390	SP_AC_390	23	2	4	18	2	3	4	5	1	99	99	0	0	0	0	0	1	0	0	0	0	0	1	99	99	99	99	99	99	99	99
391	SP_AC_391	23	2	4	18	2	3	99	4	1	99	99	1	0	1	1	1	1	0	1	0	0	1	99	99	99	99	99	99	99	99	99
392	SP_AC_392	23	2	4	18	2	5	3	4	1	99	99	1	0	1	0	1	0	0	0	99	0	1	0	5	2	5	4	2	2	4	2
393	SP_AC_393	23	2	4	18	2	3	2	4	1	99	99	1	0	1	1	1	0	1	1	0	0	0	0	99	99	99	99	99	99	99	99
394	SP_AC_394	23	2	4	22	1	4	99	5	1	99	99	1	0	1	0	1	1	1	1	0	0	1	0	5	5	5	2	4	5	5	2
395	SP_AC_395	23	2	4	18	2	3	5	3	1	99	99	0	0	0	0	0	0	0	0	1	0	1	0	5	4	3	3	5	3	2	3
396	SP_AC_396	23	2	4	17	2	4	4	5	1	99	99	1	0	1	0	1	1	1	1	0	0	1	1	5	3	4	4	5	4	5	2
397	SP_AC_397	23	2	4	18	2	3	4	3	1	99	99	0	0	1	0	0	1	1	1	0	0	0	0	5	5	4	3	4	3	5	5
398	SP_AC_398	23	2	4	18	1	3	3	3	3	99	99	0	1	0	0	0	0	1	0	0	0	1	0	5	4	5	4	5	4	5	5
399	SP_AC_399	23	2	4	18	2	3	1	5	1	99	99	1	0	1	0	1	1	1	0	1	0	1	1	99	99	99	99	99	99	99	99
400	SP_AC_400	23	2	4	18	1	4	99	4	1	99	99	1	1	1	1	1	1	1	1	0	0	1	0	5	5	4	3	4	3	4	4
401	SP_AC_401	23	2	4	18	1	3	99	5	1	99	99	1	0	1	0	1	99	99	99	0	0	0	1	99	99	99	99	99	99	99	99
402	SP_AC_402	23	2	4	19	1	3	5	3	1	99	99	0	0	1	0	1	0	1	1	0	0	1	0	5	3	4	3	5	3	5	2
403	SP_AC_403	23	2	4	18	2	3	2	4	1	99	99	0	0	1	0	1	0	1	1	0	0	0	0	5	5	4	5	3	4	5	2
404	SP_AC_404	23	2	4	18	2	4	4	5	1	99	99	1	0	1	0	1	1	1	1	0	0	1	0	5	4	3	3	3	99	5	3
405	SP_AC_405	23	2	4	18	2	3	99	4	1	99	99	1	0	0	1	1	0	1	1	0	0	1	1	5	3	5	3	4	5	5	3
406	SP_AC_406	23	2	4	17	2	5	5	5	1	99	99	1	0	1	0	0	1	1	1	0	0	1	1	5	3	5	3	5	3	5	1
407	SP_AC_407	23	2	4	20	2	5	6	5	1	99	99	1	0	1	0	0	0	1	0	0	0	0	0	99	99	99	99	99	99	99	99
408	SP_AC_408	23	2	4	19	2	3	1	3	1	99	99	0	1	0	0	1	0	1	1	0	0	0	0	99	99	99	99	99	99	99	99
409	SP_AC_409	23	2	4	18	1	3	4	4	1	99	99	0	1	0	0	0	0	1	1	0	0	0	0	99	99	99	99	99	99	99	99
410	SP_AC_410	23	2	4	18	2	4	4	5	1	99	99	1	0	1	0	1	1	0	0	0	0	0	1	99	99	99	99	99	99	99	99
411	SP_AC_411	23	2	4	17	2	4	99	4	1	99	99	0	1	0	0	1	1	1	1	0	0	1	1	99	99	99	99	99	99	99	99
412	SP_AC_412	23	2	4	17	1	4	4	3	3	99	99	1	0	0	0	0	0	1	1	0	0	1	0	5	4	5	5	5	4	5	3
413	SP_AC_413	23	2	4	18	2	5	6	5	1	99	99	1	0	0	0	0	0	1	1	0	0	1	0	5	4	2	5	3	4	2	2
414	SP_AC_414	23	2	4	18	2	4	3	4	1	99	99	0	0	1	0	1	1	1	0	0	0	0	1	99	99	99	99	99	99	99	99
415	SP_AC_415	23	2	4	18	2	5	6	5	1	99	99	0	0	1	0	1	1	1	1	0	0	1	1	99	99	99	99	99	99	99	99
416	SP_AC_416	23	2	4	17	2	3	4	3	1	99	99	0	1	0	0	1	0	1	1	0	0	0	0	99	99	99	99	99	99	99	99
417	SP_AC_417	23	2	4	19	1	3	1	4	1	99	99	0	0	1	0	1	1	1	1	0	0	1	0	99	99	99	99	99	99	99	99
418	SP_AC_418	23	2	4	20	2	4	6	5	1	99	99	0	0	0	0	99	0	1	0	0	0	1	0	99	99	99	99	99	99	99	99
419	SP_AC_419	23	2	4	18	2	5	99	5	1	99	99	1	0	1	0	1	1	1	0	0	0	1	0	99	99	99	99	99	99	99	99
420	SP_AC_420	23	2	4	18	2	5	5	5	1	99	99	1	0	1	0	1	1	1	0	0	0	1	0	5	3	5	5	5	4	5	5
421	SP_AC_421	23	2	4	19	2	3	2	5	1	99	99	1	0	1	0	1	1	1	0	0	0	0	1	5	4	5	3	5	5	4	5
422	SP_AC_422	23	2	4	18	2	4	5	4	1	99	99	1	0	1	0	1	0	0	0	0	0	1	1	5	4	5	4	4	4	4	2
423	SP_AC_423	23	2	4	18	1	5	4	3	1	99	99	1	0	1	0	1	1	1	1	0	0	0	1	5	3	5	2	5	4	3	3
424	SP_AC_424	23	2	4	17	2	3	99	5	1	99	99	1	0	99	0	1	0	1	1	0	0	1	1	99	99	99	99	99	99	99	99
425	SP_AC_425	23	2	4	17	2	3	99	4	1	99	99	1	0	0	0	1	1	1	1	0	0	1	0	99	99	99	99	99	99	99	99
426	SP_AC_426	23	2	4	21	1	4	6	5	1	99	99	1	0	0	0	1	0	1	1	0	0	1	0	99	99	99	99	99	99	99	99
427	SP_AC_427	23	2	4	18	2	4	3	4	1	99	99	0	0	1	0	0	1	1	0	0	0	0	1	4	4	4	3	4	3	4	2
428	SP_AC_428	23	2	4	22	1	5	99	4	1	99	99	1	0	1	0	1	0	1	1	0	0	0	1	5	4	99	99	99	99	99	99
429	SP_AC_429	23	2	4	21	2	5	6	5	1	99	99	1	0	1	0	1	1	0	0	0	0	0	1	4	4	4	5	5	3	4	5
430	SP_AC_430	23	2	4	17	2	5	7	5	1	99	99	1	0	1	99	1	1	1	1	0	0	1	0	99	99	99	99	99	99	99	99
432	SP_AC_432	23	2	5	22	1	4	4	3	1	99	99	1	0	1	1	1	1	1	1	0	0	1	0	5	3	4	3	5	4	5	3
433	SP_AC_433	23	2	5	18	1	4	5	4	1	99	99	0	0	1	0	0	1	1	0	1	0	0	0	5	4	3	2	3	3	5	3
434	SP_AC_434	23	2	5	17	2	3	99	4	1	99	99	1	0	0	0	1	0	0	0	0	0	0	0	99	99	99	99	99	99	99	99
435	SP_AC_435	23	2	5	17	1	4	6	5	1	99	99	1	1	1	0	1	0	1	1	0	0	1	0	5	5	5	2	4	3	4	4
436	SP_AC_436	23	2	5	18	2	4	99	4	1	99	99	1	0	0	0	1	1	1	0	0	0	1	0	99	99	99	99	99	99	99	99
437	SP_AC_437	23	2	5	17	1	5	5	5	1	99	99	1	0	0	0	0	0	1	1	1	0	1	1	1	4	2	2	5	3	5	3
438	SP_AC_438	23	2	5	18	1	4	4	4	1	99	99	1	0	1	1	1	1	1	1	0	0	0	0	5	5	5	5	5	5	5	1
440	SP_AC_440	23	2	5	17	2	4	99	3	1	99	99	0	0	0	1	0	0	0	0	0	0	0	0	5	4	5	4	4	3	4	3
442	SP_AC_442	23	2	5	22	1	5	6	5	1	99	99	0	1	1	0	1	1	1	1	0	0	1	1	5	5	4	2	5	5	5	5
443	SP_AC_443	23	2	5	18	2	4	4	3	1	99	99	1	1	0	1	0	0	0	0	0	0	1	1	5	4	4	2	5	4	99	99
444	SP_AC_444	23	2	5	18	2	4	4	5	1	99	99	1	0	1	0	0	0	1	1	0	0	0	1	5	4	3	5	4	4	5	5
445	SP_AC_445	23	2	5	18	2	4	5	5	1	99	99	1	1	0	0	1	1	1	1	0	0	1	1	5	5	4	5	5	5	5	5
446	SP_AC_446	23	2	5	18	2	3	4	3	3	99	99	1	0	0	0	0	0	1	0	0	0	0	0	5	5	5	5	5	5	5	5
447	SP_AC_447	23	2	5	18	2	5	6	5	1	99	99	1	0	1	0	1	1	1	0	0	0	0	0	99	99	99	99	99	99	99	99
448	SP_AC_448	23	2	5	24	1	4	6	5	1	99	99	0	0	0	1	0	0	0	0	0	0	1	0	99	99	99	99	99	99	99	99
449	SP_AC_449	23	2	5	18	2	4	5	5	1	99	99	1	0	0	1	1	0	1	0	0	0	1	0	99	99	99	99	99	99	99	99
450	SP_AC_450	23	2	5	24	2	5	7	5	1	99	99	1	0	1	1	1	1	1	1	0	0	0	1	5	5	5	5	5	5	5	99
451	SP_AC_451	23	2	5	17	2	3	4	5	1	99	99	0	1	0	0	0	1	1	0	0	0	1	1	99	99	99	99	99	99	99	99
452	SP_AC_452	23	2	5	17	2	4	4	5	1	99	99	0	1	0	0	0	1	1	0	0	0	1	1	99	99	99	99	99	99	99	99
453	SP_AC_453	23	2	5	18	2	3	4	2	2	99	99	0	1	0	0	0	99	1	0	99	0	1	1	99	99	99	99	99	99	99	99
454	SP_AC_454	23	2	5	18	1	5	7	5	1	99	99	0	0	0	1	0	0	1	1	1	0	1	0	4	4	3	4	2	3	2	2
455	SP_AC_455	23	2	5	18	2	3	7	4	1	99	99	1	0	0	0	1	0	1	1	0	0	1	1	99	99	99	99	99	99	99	99
456	SP_AC_456	23	2	5	18	2	5	7	5	1	99	99	0	0	0	0	1	0	1	1	0	0	1	1	99	99	99	99	99	99	99	99
457	SP_AC_457	23	2	5	18	2	5	5	5	1	99	99	1	0	1	0	1	0	1	0	0	1	0	0	99	99	99	99	99	99	99	99
458	SP_AC_458	23	2	5	19	2	5	99	5	1	99	99	1	0	1	0	1	1	1	1	0	0	1	0	99	99	99	99	99	99	99	99
459	SP_AC_459	23	2	5	17	2	5	4	4	1	99	99	0	0	1	0	1	1	1	1	0	0	1	0	5	4	5	5	3	3	3	3
460	SP_AC_460	23	2	5	18	1	4	6	5	1	99	99	1	0	1	0	1	0	1	0	1	0	1	1	5	4	5	5	5	4	5	3
461	SP_AC_461	23	2	5	22	2	5	6	5	1	99	99	0	0	0	0	0	0	1	1	0	0	0	0	5	5	5	3	5	3	3	3
462	SP_AC_462	23	2	5	19	2	4	3	5	1	99	99	0	0	0	1	0	0	0	0	0	0	0	0	5	5	3	3	4	3	3	3
463	SP_AC_463	23	2	5	19	1	3	3	5	1	99	99	1	1	1	0	1	1	1	1	0	1	1	1	5	5	5	5	5	5	5	5
464	SP_AC_464	23	2	5	18	2	3	5	5	1	99	99	1	0	1	0	1	0	0	0	1	0	0	0	5	4	4	4	5	4	4	4
465	SP_AC_465	23	2	5	17	2	3	4	4	1	99	99	1	0	1	0	1	1	1	0	0	0	1	0	99	99	99	99	99	99	99	99
466	SP_AC_466	23	2	5	18	2	3	5	4	1	99	99	1	0	1	0	1	1	1	0	0	0	0	0	99	99	99	99	99	99	99	99
467	SP_AC_467	23	2	5	18	2	5	7	5	1	99	99	1	0	0	0	1	0	1	99	99	99	0	0	99	99	99	99	99	99	99	99
468	SP_AC_468	23	2	5	19	1	4	4	4	1	99	99	1	0	1	0	0	0	1	1	0	0	0	1	5	3	5	5	5	3	5	3
470	SP_AC_470	23	2	5	17	2	5	5	5	1	99	99	0	0	0	0	0	0	1	0	0	0	1	0	99	99	99	99	99	99	99	99
471	SP_AC_471	23	2	5	17	2	4	5	5	1	99	99	1	0	1	0	1	1	1	0	0	0	1	1	5	4	5	1	5	4	5	2
472	SP_AC_472	23	2	5	18	2	3	5	3	1	99	99	0	0	0	0	0	0	0	0	0	0	0	0	5	5	5	2	5	4	5	5
473	SP_AC_473	23	2	5	99	2	4	6	5	1	99	99	1	0	1	0	0	1	0	0	0	1	0	0	5	5	5	5	5	1	5	5
474	SP_AC_474	23	2	5	18	2	3	1	3	2	99	99	1	0	1	1	1	0	1	0	1	0	1	1	5	3	3	3	5	3	5	5
475	SP_AC_475	23	2	5	17	2	5	6	5	1	99	99	1	0	1	0	1	1	1	0	0	0	0	0	5	2	4	5	5	4	5	5
476	SP_AC_476	23	2	5	18	2	4	7	5	1	99	99	0	0	0	0	0	0	1	1	1	0	1	0	5	5	5	4	1	4	5	2
477	SP_AC_477	23	2	5	18	2	4	4	3	1	99	99	0	0	0	0	0	0	0	0	0	0	0	0	5	5	3	5	5	3	3	3
478	SP_AC_478	23	2	5	18	2	4	4	5	1	99	99	1	0	1	0	1	1	0	0	0	0	1	0	5	5	4	4	4	4	2	3
479	SP_AC_479	23	2	5	17	1	3	1	5	1	99	99	99	0	99	99	99	99	99	99	0	0	0	0	5	4	5	5	5	5	5	3
480	SP_AC_480	23	2	5	17	1	5	6	5	1	99	99	1	0	1	0	1	1	1	0	0	0	1	0	5	5	4	5	5	4	5	3
481	SP_AC_481	23	2	5	20	2	3	4	3	1	99	99	0	0	0	1	0	0	0	0	1	0	0	0	5	4	4	4	5	3	5	3
482	SP_AC_482	23	2	5	21	1	3	7	5	1	99	99	0	1	1	0	0	1	1	1	0	0	1	0	5	5	5	3	5	99	5	1
483	SP_AC_483	23	2	5	19	1	3	4	5	1	99	99	0	0	1	0	0	0	1	0	0	0	1	1	5	5	5	1	5	3	5	4
484	SP_AC_484	23	2	5	19	2	3	1	4	1	99	99	1	0	0	0	0	1	1	0	0	0	1	1	4	2	4	5	5	3	5	5
485	SP_AC_485	23	2	5	18	1	3	2	3	1	99	99	1	1	1	0	1	0	1	1	0	0	1	1	5	5	5	5	5	5	5	5
486	SP_AC_486	23	2	5	20	1	2	7	3	1	99	99	1	1	1	1	1	0	0	0	0	0	1	1	5	4	5	5	5	2	5	5
487	SP_AC_487	23	2	5	17	2	4	4	4	1	99	99	1	0	1	0	1	0	1	0	0	0	1	0	3	4	5	5	5	2	5	3
488	SP_AC_488	23	2	5	19	2	4	4	5	1	99	99	1	1	1	1	1	1	1	1	0	1	1	0	5	5	4	5	5	4	5	5
489	SP_AC_489	23	2	5	17	2	4	5	3	1	99	99	0	0	1	0	1	1	1	0	0	0	0	1	4	3	4	2	5	5	5	3
490	SP_AC_490	23	2	5	17	2	3	3	3	1	99	99	1	0	0	0	0	0	0	0	0	0	99	1	5	4	1	2	5	4	5	5
491	SP_AC_491	23	2	5	21	2	3	4	4	1	99	99	0	1	0	0	0	0	0	0	0	0	1	1	5	3	4	4	5	3	5	3
494	SP_AC_494	23	2	5	21	1	3	1	3	3	99	99	0	0	1	0	1	1	1	1	0	0	0	1	5	3	5	5	5	1	5	4
495	SP_AC_495	23	2	5	18	2	4	99	3	1	99	99	1	0	0	1	1	1	1	0	0	0	1	0	5	5	5	3	5	5	5	5
496	SP_AC_496	23	2	6	18	2	3	5	5	1	99	99	1	1	0	0	1	1	0	0	0	0	0	99	99	99	99	99	99	99	99	99
497	SP_AC_497	23	2	6	19	2	3	4	4	1	99	99	1	0	1	0	1	1	0	0	0	0	99	1	99	99	99	99	99	99	99	99
498	SP_AC_498	23	2	6	18	2	5	5	5	1	99	99	1	1	1	0	1	1	1	0	0	0	1	0	5	3	5	5	5	4	5	5
500	SP_AC_500	23	2	6	20	2	3	99	5	1	99	99	1	0	1	0	1	0	1	1	0	1	0	1	5	5	3	4	5	5	5	4
501	SP_AC_501	23	2	6	18	2	5	6	5	1	99	99	1	0	1	0	0	0	1	1	0	0	0	0	99	99	99	99	99	99	99	99
502	SP_AC_502	23	2	6	18	2	3	99	5	1	99	99	0	0	0	0	0	0	1	1	0	0	1	99	99	99	99	99	99	99	99	99
503	SP_AC_503	23	2	6	17	2	4	99	5	1	99	99	0	0	0	0	0	0	1	1	0	0	1	99	99	99	99	99	99	99	99	99
504	SP_AC_504	23	2	6	18	2	3	99	5	1	99	99	0	0	0	0	0	0	1	1	0	0	1	99	99	99	99	99	99	99	99	99
505	SP_AC_505	23	2	6	22	2	3	2	3	1	99	99	0	0	1	0	0	0	1	1	0	0	0	0	4	5	4	4	4	4	3	5
506	SP_AC_506	23	2	6	99	2	4	4	3	1	99	99	1	0	0	0	0	0	0	0	0	0	1	0	5	3	4	3	5	5	5	3
508	SP_AC_508	23	2	6	18	2	3	99	3	1	99	99	0	1	0	1	0	0	1	1	0	0	1	99	99	99	99	99	99	99	99	99
509	SP_AC_509	23	2	6	23	2	5	5	5	1	99	99	0	0	0	1	0	0	1	0	0	0	1	0	99	99	99	99	99	99	99	99
510	SP_AC_510	23	2	6	20	2	4	4	5	1	99	99	1	0	0	0	0	0	1	0	0	0	1	0	99	99	99	99	99	99	99	99
511	SP_AC_511	23	2	6	17	2	3	5	3	1	99	99	1	0	0	0	0	0	1	1	0	99	99	99	99	99	99	99	99	99	99	99
512	SP_AC_512	23	2	6	17	2	2	2	3	1	99	99	1	1	0	0	1	1	1	1	0	0	1	0	99	99	99	99	99	99	99	99
513	SP_AC_513	23	2	6	22	1	3	5	5	1	99	99	1	0	1	1	1	1	1	0	1	0	1	0	5	5	5	5	5	3	5	5
515	SP_AC_515	23	2	6	20	2	5	99	4	1	99	99	0	0	1	0	1	1	0	0	0	0	1	1	5	5	2	3	3	2	4	4
516	SP_AC_516	23	2	6	19	1	3	99	5	1	99	99	0	0	0	0	0	0	0	1	0	0	1	1	5	3	5	5	5	4	3	4
517	SP_AC_517	23	2	6	18	2	3	3	5	1	99	99	1	0	99	0	1	1	0	0	0	99	1	1	5	5	2	4	5	4	4	5
518	SP_AC_518	23	2	6	24	2	3	5	99	1	99	99	0	0	0	0	0	0	0	0	0	0	99	0	5	5	5	5	5	4	99	3
519	SP_AC_519	23	2	6	19	2	3	2	4	1	99	99	0	0	1	1	0	0	1	99	0	0	0	0	5	3	3	3	5	3	4	3
520	SP_AC_520	23	2	6	21	2	3	4	4	1	99	99	0	0	1	0	0	1	1	1	0	0	1	0	5	3	4	4	4	4	4	3
521	SP_AC_521	23	2	6	18	2	3	1	3	1	99	99	1	0	0	0	1	1	1	0	0	0	0	1	5	5	5	5	5	1	5	3
522	SP_AC_522	23	2	6	21	2	99	5	5	1	99	99	0	0	0	0	0	0	0	0	0	0	0	1	5	4	5	5	5	5	5	5
523	SP_AC_523	23	2	6	19	2	3	99	5	1	99	99	0	0	1	0	1	1	1	1	1	0	0	0	5	3	5	3	5	3	5	5
524	SP_AC_524	23	2	6	22	2	4	4	3	1	99	99	0	0	1	0	0	0	0	0	0	0	0	0	4	3	4	2	4	3	4	3
525	SP_AC_525	23	2	6	20	2	4	4	4	1	99	99	0	0	0	0	1	1	0	0	0	0	1	99	4	3	4	3	2	3	2	3
526	SP_AC_526	23	2	6	22	2	4	4	5	1	99	99	1	0	0	0	0	0	1	0	0	0	0	0	4	4	4	2	4	3	3	4
528	SP_AC_528	23	2	6	21	2	3	5	5	1	99	99	0	0	0	0	0	0	1	1	0	0	1	0	5	3	4	5	4	3	4	5
529	SP_AC_529	23	2	6	18	2	3	1	5	1	99	99	0	0	0	1	1	0	0	0	0	1	0	0	5	5	4	3	5	3	5	3
530	SP_AC_530	23	2	6	17	2	3	4	3	1	99	99	0	0	1	0	1	0	1	1	0	0	1	0	5	3	4	3	99	3	2	2
531	SP_AC_531	23	2	6	17	2	3	4	3	1	99	99	0	0	0	0	0	0	0	0	0	0	0	1	5	5	4	2	5	2	5	2
533	SP_AC_533	23	2	6	23	2	4	5	3	3	99	99	0	0	0	1	0	0	1	1	0	0	0	1	5	5	5	1	5	4	5	5
534	SP_AC_534	23	2	6	18	2	5	5	5	1	99	99	0	0	1	0	0	0	1	1	0	0	1	1	4	3	4	4	4	4	2	3
535	SP_AC_535	23	2	6	18	2	3	2	5	1	99	99	1	0	0	0	1	0	1	0	0	0	0	0	5	5	3	3	5	4	5	1
536	SP_AC_536	23	2	6	23	2	5	5	5	1	99	99	0	1	0	0	1	0	0	0	0	0	1	1	5	4	4	3	5	3	5	3
537	SP_AC_537	23	2	6	22	2	2	3	4	2	99	99	0	0	0	0	0	0	0	0	0	0	0	0	5	3	4	3	4	5	4	4
538	SP_AC_538	23	2	6	17	2	99	4	4	1	99	99	0	0	1	0	1	1	1	0	0	0	0	0	5	3	5	5	5	3	5	3
539	SP_AC_539	23	2	6	24	2	4	4	3	1	99	99	0	1	0	0	0	0	1	0	0	0	0	0	5	4	4	3	5	4	5	4
540	SP_AC_540	23	2	6	21	2	4	3	99	1	99	99	0	0	0	0	0	0	0	0	0	0	99	0	5	5	5	2	5	4	4	2
543	SP_AC_543	23	2	6	18	2	3	1	3	1	99	99	0	0	0	0	1	0	0	0	0	0	0	1	5	5	5	5	5	1	5	5
544	SP_AC_544	23	2	6	19	2	4	4	3	1	99	99	0	0	0	0	0	0	0	0	0	0	1	0	5	3	3	3	4	5	5	3
545	SP_AC_545	23	2	6	18	2	3	5	3	1	99	99	0	0	0	0	99	0	0	0	0	0	0	0	5	4	5	3	5	3	5	3
546	SP_AC_546	23	2	6	19	2	3	4	5	1	99	99	0	0	0	0	0	0	1	1	0	0	99	1	5	5	2	4	2	4	5	3
547	SP_AC_547	23	2	6	20	2	4	2	3	1	99	99	0	1	0	0	0	0	0	0	0	0	0	0	5	4	3	2	5	5	4	5
548	SP_AC_548	23	2	6	20	2	2	3	5	1	99	99	0	0	0	0	0	0	1	99	1	0	0	0	4	5	2	1	5	5	2	1
549	SP_AC_549	23	2	6	17	2	3	3	4	1	99	99	0	1	1	0	0	0	1	1	0	0	0	0	5	5	5	3	5	5	5	4
550	SP_AC_550	23	2	6	18	2	5	4	5	1	99	99	0	0	1	99	1	1	0	1	99	99	0	0	5	4	5	5	99	99	99	99
551	SP_AC_551	23	2	6	18	2	4	4	5	1	99	99	0	1	1	0	0	1	1	1	0	0	0	0	5	5	4	2	5	5	4	2
553	SLV_TN_553	21	1	7	19	2	5	6	5	1	99	99	1	0	0	0	0	0	1	1	0	0	1	1	4	5	2	5	4	4	5	1	5	5	4	5	4	3	3	2	4	1
554	SLV_TN_554	21	1	7	19	2	1	3	3	1	11	11	0	0	0	0	1	0	1	1	0	0	1	0	5	5	4	3	3	5	5	1	1	1	1	1	1	4	1	1	1	1
555	SLV_TN_555	21	1	7	19	2	5	4	5	1	3	3	0	0	0	0	0	0	1	1	0	0	1	0	4	5	4	3	2	1	2	3	3	1	3	3	1	4	5	1	1	1
556	SLV_TN_556	21	1	7	19	2	3	4	4	2	3	3	0	0	1	0	0	0	0	0	0	0	0	0	4	4	5	4	4	3	2	4	99	99	99	99	99	99	99	99	99	99
557	SLV_TN_557	21	1	7	20	2	1	4	3	2	3	3	0	1	0	0	0	0	1	1	0	0	1	0	5	5	3	3	5	5	5	3	5	5	5	5	4	5	5	5	4	3
558	SLV_TN_558	21	1	7	19	2	4	4	3	1	3	3	0	0	0	0	1	0	1	1	0	0	1	0	4	5	5	5	5	4	5	5	5	5	4	5	1	3	4	4	1	5
559	SLV_TN_559	21	1	7	20	2	4	4	5	3	11	11	0	0	0	0	0	0	1	0	0	1	1	0	4	5	5	3	4	4	5	3	3	3	2	2	2	3	1	1	2	1
561	SLV_TN_561	21	1	7	19	2	5	4	5	1	3	3	0	1	0	0	1	1	1	0	0	0	1	0	5	5	5	3	5	5	3	4	5	5	5	5	2	3	5	3	3	3
562	SLV_TN_562	21	1	7	19	2	5	4	3	1	3	3	0	0	0	0	0	0	0	0	0	0	0	0	5	4	4	5	5	4	5	4	4	3	2	5	1	5	4	3	2	1
563	SLV_TN_563	21	1	7	20	2	1	4	3	1	3	3	1	0	1	0	1	1	1	1	0	0	0	1	5	5	3	3	4	4	2	3	5	3	4	4	3	4	4	3	3	3
564	SLV_TN_564	21	1	7	19	2	3	4	5	1	3	3	0	0	0	0	0	0	1	0	0	0	1	1	4	1	5	2	4	5	4	1	5	4	3	4	3	4	3	3	4	4
565	SLV_TN_565	21	1	7	19	2	5	5	5	1	3	3	0	0	0	0	1	1	1	0	0	0	1	0	5	4	3	3	4	4	4	2	5	5	5	5	5	5	5	5	5	5
566	SLV_TN_566	21	1	7	19	2	4	3	4	2	3	3	0	0	0	0	0	0	1	0	0	0	1	1	5	5	4	4	4	4	4	4	5	3	5	5	3	5	5	4	3	4
567	SLV_TN_567	21	1	7	20	2	4	4	5	1	3	3	0	0	0	0	0	0	1	0	0	0	0	1	5	4	3	2	4	4	5	3	5	4	3	5	3	5	3	4	4	3
568	SLV_TN_568	21	1	7	19	2	4	3	3	2	3	3	0	0	0	0	0	0	0	0	0	0	0	0	5	5	3	3	4	4	2	4	5	5	5	5	5	5	5	5	5	5
569	SLV_TN_569	21	1	7	20	2	4	1	4	1	11	11	0	0	0	0	0	0	0	0	0	0	0	1	5	5	5	5	5	5	5	5	1	1	1	5	5	5	2	1	5	1
570	SLV_TN_570	21	1	7	19	2	3	3	3	2	11	11	0	0	1	0	0	0	1	1	0	0	0	0	4	5	5	3	5	5	5	3	1	2	1	1	1	1	1	1	1	1
571	SLV_TN_571	21	1	7	20	1	3	2	4	1	2	2	0	0	0	0	0	0	1	1	0	0	0	1	5	4	4	99	5	4	5	5	3	2	4	2	1	3	1	1	1	1
572	SLV_TN_572	21	1	7	21	2	3	5	4	1	3	3	0	0	0	0	0	0	1	1	0	0	0	1	5	5	5	4	5	5	5	4	3	3	4	4	3	4	2	3	4	3
574	SLV_TN_574	21	1	7	19	2	4	3	5	1	3	3	0	0	0	0	0	0	1	0	0	0	0	1	5	3	5	5	5	1	5	1	5	5	3	4	4	5	5	5	5	3
575	SLV_TN_575	21	1	7	20	1	1	5	5	2	11	11	0	0	1	0	0	0	1	1	0	1	0	0	5	5	5	4	5	5	5	1	1	1	4	1	1	1	1	1	3	2
577	SLV_TN_577	21	1	7	19	2	5	4	2	1	3	3	0	0	0	0	0	0	1	1	0	0	0	0	5	3	3	4	3	4	4	2	5	5	5	5	5	5	5	5	5	5
578	SLV_TN_578	21	1	7	19	2	5	1	2	3	3	3	0	0	0	0	1	0	1	1	0	0	0	0	5	3	3	4	5	3	4	2	5	5	1	5	5	5	5	3	5	5
579	SLV_TN_579	21	1	7	20	2	3	4	2	2	3	3	0	0	0	0	0	0	1	0	0	0	0	0	5	4	3	3	4	4	3	3	3	3	3	4	2	3	4	3	4	2
580	SLV_TN_580	21	1	7	19	2	3	4	5	2	3	3	1	0	0	0	0	0	1	1	0	0	0	1	5	4	3	3	4	4	3	3	5	5	1	5	1	1	3	5	1	3
582	SLV_TN_582	21	1	7	19	2	3	5	5	1	3	3	0	0	0	0	0	1	0	0	0	0	0	0	5	5	5	4	4	5	5	1	99	99	99	99	99	99	99	99	99	99
583	SLV_TN_583	21	1	7	19	2	3	1	3	1	3	3	0	0	0	1	0	0	0	0	0	0	0	0	4	4	3	2	2	4	3	4	5	5	3	4	2	5	3	3	4	3
584	SLV_TN_584	21	1	7	19	2	4	1	3	1	3	3	0	0	0	1	0	0	1	0	0	0	0	1	4	3	3	4	5	3	2	3	4	4	2	1	1	3	4	1	1	1
585	SLV_TN_585	21	1	7	19	2	5	4	4	2	11	11	0	0	0	0	0	0	0	0	0	0	1	0	2	2	3	3	3	4	4	1	5	5	4	3	5	5	5	4	5	3
586	SLV_TN_586	21	1	7	19	2	5	4	5	1	3	3	0	0	1	0	0	0	0	0	99	0	1	0	4	3	1	3	4	2	1	1	3	3	2	3	2	2	2	1	3	3
587	SLV_TN_587	21	1	7	20	2	5	6	5	1	3	3	0	0	1	0	0	0	1	1	0	0	1	0	5	1	4	1	5	1	4	1	5	5	5	5	5	5	5	5	5	5
589	SLV_TN_589	21	1	7	20	2	4	4	5	1	3	3	0	0	0	0	1	0	1	1	0	0	99	0	4	3	4	4	4	5	3	4	4	4	3	4	4	3	3	3	3	3
590	SLV_TN_590	21	1	7	19	2	1	2	5	2	3	3	0	0	0	0	1	1	1	0	99	1	0	0	5	3	4	4	4	2	1	2	5	4	5	5	1	2	5	3	4	3
591	SLV_TN_591	21	1	7	19	2	5	4	5	1	3	3	0	0	1	0	0	0	1	0	0	0	0	0	5	4	3	3	5	4	4	2	99	99	99	99	99	99	99	99	99	99
592	SLV_TN_592	21	1	7	19	2	3	3	4	3	3	3	0	0	0	0	1	0	1	1	0	0	1	0	5	5	4	1	5	5	5	1	3	3	4	4	4	4	4	4	5	4
593	SLV_TN_593	21	1	7	20	2	4	4	3	2	11	11	1	0	0	0	0	0	1	0	0	0	1	0	4	4	4	2	3	2	4	4	4	4	3	2	3	2	4	4	2	2
594	SLV_TN_594	21	1	7	19	2	99	4	4	1	3	3	0	0	0	0	0	0	1	1	0	0	1	0	5	4	5	4	5	5	5	5	1	1	1	1	1	1	1	1	1	1
595	SLV_TN_595	21	1	7	20	1	3	4	3	1	11	11	0	0	1	0	1	0	0	0	1	0	0	0	4	3	4	1	4	3	2	4	5	5	5	5	5	4	3	5	4	2
596	SLV_TN_596	21	1	7	19	2	5	4	4	3	3	3	0	0	0	0	0	0	1	0	1	1	0	1	5	4	5	3	4	3	5	2	5	5	5	5	5	5	5	5	5	5
597	SLV_TN_597	21	1	7	19	2	4	5	3	3	3	3	0	0	0	0	0	0	1	1	0	0	0	0	2	3	2	3	2	4	3	3	2	3	3	2	3	2	4	3	2	2
598	SLV_TN_598	21	1	7	19	2	4	4	5	1	3	3	1	0	0	0	0	0	1	1	0	1	1	0	5	4	3	3	5	5	5	1	3	3	3	3	3	5	5	5	5	3
599	SLV_TN_599	21	1	7	20	2	4	3	3	3	3	3	0	0	0	1	1	0	1	0	0	0	1	0	1	5	3	99	4	2	4	1	5	3	4	2	4	5	3	4	2	1
600	SLV_TN_600	21	1	7	20	2	4	2	3	3	11	11	0	0	1	1	0	0	0	0	0	0	0	0	5	5	1	2	3	4	2	5	99	99	99	99	99	99	99	99	99	99
601	SLV_TN_601	21	1	7	20	1	5	4	5	3	11	11	0	0	0	1	0	0	1	1	0	0	1	0	4	2	4	2	4	2	4	2	1	1	1	1	1	1	1	1	1	1
602	SLV_TN_602	21	1	7	19	2	3	1	3	3	3	3	0	0	0	0	0	0	1	1	0	0	1	1	5	2	1	4	3	4	3	4	99	99	99	99	99	99	99	99	99	99
603	SLV_TN_603	21	1	7	21	2	3	3	3	2	11	11	0	0	1	0	0	0	0	0	0	0	1	0	3	3	3	3	3	3	3	3	3	3	3	3	3	3	3	3	3	3
604	SLV_TN_604	21	1	7	20	2	4	3	5	1	11	11	0	0	0	0	0	0	0	0	0	0	0	1	4	4	3	3	4	4	2	3	3	3	2	4	2	5	2	2	3	1
605	SLV_TN_605	21	1	7	20	2	3	4	5	1	3	3	0	0	0	0	0	0	1	1	0	0	0	0	5	5	5	1	5	99	99	1	5	5	5	5	5	5	5	5	5	5
606	SLV_TN_606	21	1	7	21	1	1	4	3	1	3	3	0	0	0	1	0	0	1	0	0	0	1	1	5	3	4	4	5	4	5	3	5	5	4	5	1	1	2	4	2	1
608	SLV_TN_608	21	1	7	20	2	1	3	3	2	3	3	0	0	0	1	0	0	1	1	0	0	0	0	3	4	3	3	5	5	5	4	4	4	4	3	1	4	1	1	3	1
609	SLV_TN_609	21	1	7	20	1	1	1	5	2	11	11	1	0	0	1	0	0	1	0	0	0	1	0	2	4	5	3	4	4	3	5	3	3	1	1	1	3	3	1	1	1
610	SLV_TN_610	21	1	7	19	2	1	4	4	2	11	11	0	0	0	0	0	0	1	1	0	0	1	0	3	4	3	1	5	4	5	4	1	1	3	1	1	3	1	1	2	1
611	SLV_TN_611	21	1	7	19	2	4	2	5	1	3	3	0	0	1	0	0	0	0	0	0	0	1	0	3	4	2	3	4	4	4	2	5	5	5	5	5	5	5	5	5	5
612	SLV_TN_612	21	1	7	19	2	3	3	4	1	3	3	0	0	0	0	0	0	1	1	0	99	0	0	3	4	4	2	5	5	5	4	5	5	5	5	4	5	5	4	5	4
614	SLV_TN_614	21	1	7	20	1	4	1	3	3	3	3	0	0	0	0	0	0	1	1	0	0	0	0	4	4	5	3	4	3	5	4	1	1	2	1	1	1	1	1	1	1
615	SLV_TN_615	21	1	7	19	2	5	5	5	1	3	3	0	0	0	0	0	0	1	1	0	0	0	0	5	5	4	1	5	5	5	1	5	5	5	5	2	4	4	3	5	3
616	SLV_TN_616	21	1	7	19	2	3	4	3	3	3	3	1	0	1	0	1	0	1	1	0	0	0	1	5	3	4	4	5	4	5	5	4	4	4	4	3	4	3	3	4	3
617	SLV_TN_617	21	1	7	19	2	5	1	5	1	3	3	0	0	0	0	0	0	1	1	0	0	0	0	5	5	4	3	5	5	4	5	5	5	5	4	2	5	5	4	5	5
618	SLV_TN_618	21	1	7	19	2	1	1	3	3	3	3	0	0	0	0	0	0	0	0	0	0	0	0	3	1	1	1	5	1	1	3	5	5	5	5	5	5	5	5	5	5
619	SLV_TN_619	21	1	7	20	2	2	4	3	3	3	3	0	0	0	0	0	1	0	0	1	0	0	0	4	1	1	2	2	1	2	3	5	5	5	5	5	5	5	5	5	5
620	SLV_TN_620	21	1	7	19	2	5	4	5	1	3	3	0	1	0	0	0	0	1	1	0	0	1	0	5	4	2	4	3	5	1	1	5	5	4	5	3	4	4	4	3	4
621	SLV_TN_621	21	1	7	19	2	2	6	4	2	11	11	0	0	0	1	0	0	1	1	0	0	1	0	5	3	3	3	5	4	3	1	3	5	2	3	3	4	4	4	3	2
622	SLV_TN_622	21	1	7	20	2	4	3	5	1	3	3	0	0	1	0	0	0	1	1	0	0	1	0	5	1	5	1	5	5	5	3	5	5	5	5	5	5	5	5	5	5
623	SLV_TN_623	21	1	7	19	1	4	2	5	1	12	12	0	1	0	0	0	0	1	0	0	1	0	1	5	3	5	2	5	5	3	5	1	1	1	1	1	1	1	1	1	1
624	SLV_TN_624	21	1	7	21	2	3	3	5	1	3	3	0	0	0	0	0	0	0	0	0	0	1	1	4	2	5	3	4	4	2	5	5	5	5	5	5	5	5	5	5	5
625	SLV_TN_625	21	1	7	21	2	5	5	4	1	3	3	0	0	0	0	0	0	1	1	0	0	0	0	5	5	3	2	5	5	5	5	5	5	5	5	5	5	5	5	5	5
626	SLV_TN_626	21	1	7	21	1	3	2	3	3	11	11	1	0	0	0	0	0	1	1	0	0	0	1	5	4	5	2	4	5	3	2	3	4	3	4	1	5	3	1	3	1
627	SLV_TN_627	21	1	7	20	1	5	5	5	1	11	11	0	0	0	0	0	1	1	1	0	0	1	0	3	3	4	3	2	4	2	2	4	2	4	2	3	2	4	2	4	2
628	SLV_TN_628	21	1	7	22	2	5	4	5	1	3	3	0	1	1	0	1	1	1	1	0	0	1	0	4	2	5	3	5	4	4	1	5	5	5	5	5	5	5	5	5	5
629	SLV_TN_629	21	1	7	21	2	5	4	3	1	3	3	0	0	0	0	0	0	1	1	0	0	0	0	5	4	4	3	5	5	3	2	5	5	4	4	3	5	2	2	5	2
631	SLV_TN_631	21	1	7	21	2	4	1	4	1	3	3	0	0	0	0	0	0	1	1	0	0	1	0	5	5	2	3	5	4	5	1	5	5	5	5	5	5	5	5	5	5
632	SLV_TN_632	21	1	7	23	1	3	3	5	1	3	3	0	0	0	0	0	0	1	0	0	0	1	0	5	5	5	4	4	4	4	5	1	1	2	1	1	2	1	1	2	1
633	SLV_TN_633	21	1	7	22	2	5	7	5	2	3	3	0	0	0	0	0	0	1	1	0	0	0	0	5	4	2	2	5	5	5	3	5	1	3	3	1	5	1	1	1	1
634	SLV_TN_634	21	1	7	21	2	4	2	5	2	2	2	0	1	0	0	0	0	1	0	0	0	0	0	5	4	5	4	5	5	5	3	5	3	3	5	2	2	3	3	1	3
635	SLV_TN_635	21	1	7	19	2	5	6	5	1	3	3	0	0	0	1	0	0	1	0	0	0	0	0	5	3	4	3	4	4	4	3	5	5	5	5	4	5	5	4	5	4
636	SLV_TN_636	21	1	7	19	1	5	6	5	1	3	3	0	0	1	0	0	0	1	0	0	0	1	0	5	4	4	5	5	5	5	3	5	5	5	5	5	5	5	5	5	5
637	SLV_TN_637	21	1	7	20	2	5	6	5	1	3	3	0	0	0	0	0	0	1	0	0	0	1	1	3	4	4	3	4	4	4	2	5	5	5	5	5	5	5	5	5	5
638	SLV_TN_638	21	1	7	20	2	5	6	5	1	3	3	0	0	0	0	0	0	1	0	0	0	1	0	4	4	4	3	5	5	5	5	5	5	5	5	4	5	5	5	5	5
640	SLV_TN_640	21	1	7	19	2	5	6	5	3	3	3	0	0	1	1	1	0	1	1	0	1	1	0	5	4	3	3	5	4	5	3	5	5	5	5	5	5	5	4	5	4
641	SLV_TN_641	21	1	7	19	2	4	6	3	2	3	3	0	0	1	0	0	0	1	0	0	0	1	0	5	3	5	1	4	4	5	3	5	4	3	5	1	5	1	1	3	1
642	SLV_TN_642	21	1	7	19	2	5	5	4	1	3	3	0	0	0	0	0	0	0	0	0	0	1	0	5	4	4	2	5	5	5	3	5	5	5	5	5	5	4	5	5	5
643	SLV_TN_643	21	1	7	19	2	5	5	4	1	12	12	0	0	0	0	0	0	0	0	0	0	1	0	5	5	5	3	5	5	5	4	5	5	5	5	5	5	5	5	5	5
645	SLV_TN_645	21	1	7	19	2	4	99	5	3	2	2	0	0	0	1	0	0	1	1	0	0	1	1	4	4	4	2	5	3	4	3	4	4	3	4	1	3	3	2	2	1
646	SLV_TN_646	21	1	7	19	2	5	5	5	1	3	3	0	1	0	0	0	0	0	0	0	0	1	0	5	5	5	5	5	4	5	5	3	3	4	3	3	4	3	3	4	3
647	SLV_TN_647	21	1	7	19	2	5	6	5	1	3	3	0	0	0	1	0	0	1	1	0	0	0	0	4	5	5	5	4	5	5	5	4	5	1	4	3	3	4	3	2	3
648	SLV_TN_648	21	1	7	19	2	3	5	3	2	3	3	0	0	0	0	0	0	1	1	0	0	0	0	4	1	3	4	4	2	4	3	5	5	5	5	5	5	5	5	5	5
649	SLV_TN_649	21	1	7	20	2	4	7	5	1	3	3	0	0	0	0	0	0	1	1	0	0	1	0	5	3	5	1	5	99	4	3	3	3	4	5	5	3	5	2	3	2
650	SLV_TN_650	21	1	7	20	1	3	6	5	1	3	3	0	0	0	0	0	0	0	0	0	0	1	1	4	5	4	3	5	4	2	5	5	5	5	5	5	5	5	5	5	5
651	SLV_TN_651	21	1	7	19	2	5	5	5	1	3	3	0	0	0	0	0	0	0	1	0	1	0	0	5	4	4	5	1	2	3	2	5	5	5	5	5	5	5	5	5	5
652	SLV_TN_652	21	1	7	19	2	5	5	5	1	3	3	0	0	0	0	0	0	0	0	1	0	0	1	5	4	4	3	5	2	3	2	5	5	5	5	5	5	5	5	5	5
653	SLV_TN_653	21	1	7	20	2	4	5	5	1	3	3	0	1	0	0	0	0	1	1	0	0	0	0	5	4	4	3	5	4	4	1	4	4	3	4	1	4	5	3	4	3
654	SLV_TN_654	21	1	7	19	2	3	2	3	3	3	3	0	0	0	0	0	0	1	1	0	0	1	0	5	3	3	3	4	4	4	3	5	5	5	5	5	5	5	5	5	5
656	SLV_TN_656	21	1	7	20	1	1	4	5	1	11	11	1	0	1	1	1	1	1	0	0	0	1	0	5	5	5	5	5	5	5	5	1	1	1	1	1	1	1	1	1	1
657	SLV_TN_657	21	1	7	20	2	4	5	5	1	3	3	0	0	1	0	0	0	1	0	0	0	1	0	5	1	4	1	5	4	2	1	5	5	5	5	5	5	5	4	5	5
658	SLV_TN_658	21	1	7	19	2	5	4	5	1	3	3	1	0	1	0	0	0	1	1	0	0	1	0	4	5	4	4	4	4	4	4	5	5	5	5	4	5	4	4	5	4
659	SLV_TN_659	21	1	7	19	1	5	3	5	1	3	3	0	0	0	0	0	0	1	0	1	0	0	0	5	1	5	4	5	4	1	1	5	5	5	5	5	5	5	5	5	5
660	SLV_TN_660	21	1	7	19	2	4	4	5	1	3	3	0	0	0	0	0	0	1	0	0	0	0	1	5	2	5	4	5	4	5	1	3	3	2	4	1	4	1	1	4	1
661	SLV_TN_661	21	1	7	19	2	4	5	4	1	3	3	0	0	0	0	0	0	1	1	0	0	1	1	5	4	4	3	4	3	4	3	5	5	4	5	4	4	5	4	4	4
662	SLV_TN_662	21	1	7	19	2	5	4	5	1	3	3	1	0	0	0	0	0	0	0	0	0	0	0	5	5	3	1	5	4	5	1	5	5	5	5	4	4	4	4	5	4
663	SLV_TN_663	21	1	7	19	2	4	4	5	1	3	3	0	0	0	0	0	0	1	0	0	0	0	0	5	3	5	3	5	4	5	3	5	5	5	5	5	5	4	5	5	5
664	SLV_TN_664	21	1	7	19	2	4	3	3	1	3	3	0	0	0	1	0	0	0	0	0	0	0	0	5	5	5	5	4	5	5	5	5	5	4	5	4	5	4	3	4	4
665	SLV_TN_665	21	1	7	19	2	5	4	3	1	3	3	0	0	0	0	0	0	0	0	0	0	0	0	5	4	3	3	4	4	4	2	5	5	5	5	5	5	5	5	5	5
666	SLV_TN_666	21	1	7	20	1	5	4	4	1	3	3	0	0	1	1	0	0	1	0	0	0	0	0	5	4	4	4	5	4	5	4	2	1	3	2	1	1	1	1	1	1
667	SLV_TN_667	21	1	7	19	1	1	3	5	3	3	3	0	1	1	0	0	0	1	1	0	0	1	0	5	3	4	3	5	4	4	4	4	4	3	4	3	3	3	4	3	3
668	SLV_TN_668	21	1	7	19	2	5	6	5	1	3	3	0	0	1	0	1	0	1	0	0	0	1	0	4	4	5	5	5	5	5	5	5	5	3	5	1	3	5	5	3	5
669	SLV_TN_669	21	1	7	22	2	1	4	4	1	3	3	0	1	0	0	0	0	1	1	0	1	1	0	5	4	4	3	4	4	1	5	5	5	3	5	3	3	3	4	5	3
671	SLV_TN_671	21	1	7	19	2	5	7	5	1	11	11	0	0	0	0	0	0	1	1	0	0	1	0	5	4	4	2	5	4	5	3	1	1	1	1	1	1	1	1	1	1
672	SLV_TN_672	21	1	7	20	2	1	3	5	1	11	11	0	0	0	0	0	0	1	1	0	0	0	0	5	5	5	3	5	5	5	3	1	1	1	1	1	1	1	1	1	1
673	SLV_TN_673	21	1	7	19	2	5	4	3	2	3	3	0	0	0	0	1	0	1	1	0	0	0	0	5	4	5	1	5	5	5	3	3	1	1	3	1	1	1	1	1	1
674	SLV_TN_674	21	1	7	20	2	5	4	4	1	3	3	1	0	0	0	0	0	1	1	0	0	1	1	3	2	5	3	3	2	2	1	5	4	1	4	4	4	4	4	5	3
675	SLV_TN_675	21	1	7	19	2	4	4	3	1	3	3	0	0	1	0	1	0	1	1	0	0	0	0	4	3	4	3	5	3	5	3	4	4	3	3	3	4	3	3	3	3
676	SLV_TN_676	21	1	7	19	2	3	2	5	1	3	3	0	0	0	0	1	0	1	0	0	0	1	0	5	5	5	1	5	99	5	5	2	2	2	1	1	2	1	1	5	1
677	SLV_TN_677	21	1	7	21	2	5	4	5	3	3	3	0	1	0	0	1	0	0	0	0	1	1	0	4	3	3	2	3	4	4	3	5	4	4	4	2	4	2	2	1	1
678	SLV_TN_678	21	1	7	20	1	4	1	3	2	11	11	0	0	0	0	0	0	0	0	0	0	1	1	5	5	3	3	5	4	5	5	1	1	2	1	1	1	1	1	1	1
679	SLV_TN_679	21	1	7	19	1	3	3	3	1	3	3	1	0	1	0	0	0	0	1	0	0	0	0	5	5	5	1	5	3	5	5	3	3	3	3	1	2	3	3	3	3
680	SLV_TN_680	21	1	7	21	2	4	7	5	1	3	3	1	1	0	0	0	0	1	1	0	0	1	1	5	5	4	5	5	4	5	5	5	4	3	4	1	5	1	3	4	5
681	SLV_TN_681	21	1	7	21	2	1	4	4	3	3	3	1	0	1	0	1	0	0	0	0	0	0	0	5	4	4	3	5	3	4	5	3	3	4	4	1	3	2	2	2	2
682	SLV_TN_682	21	1	7	20	2	1	2	4	3	3	3	0	0	1	0	0	0	0	0	0	0	0	0	4	3	3	5	5	4	3	4	3	3	2	1	1	3	1	1	2	1
683	SLV_TN_683	21	1	7	20	2	4	6	5	1	11	11	1	0	0	0	0	0	1	1	0	1	1	1	3	4	2	2	4	4	4	4	1	1	1	1	1	1	1	1	1	1
684	SLV_TN_684	21	1	7	20	2	4	3	5	1	2	2	0	0	0	1	0	0	0	1	0	0	1	1	5	5	4	2	4	2	3	5	1	1	2	1	4	4	1	1	1	1
685	SLV_TN_685	21	1	7	19	2	1	2	4	2	9	12	0	0	1	0	0	0	1	1	0	0	1	0	5	3	4	5	5	5	5	2	5	4	3	4	3	5	3	3	5	3
686	SLV_TN_686	21	1	7	21	1	1	2	3	3	3	3	0	0	0	0	1	0	0	0	99	99	99	0	4	4	5	3	4	3	4	99	99	99	99	99	99	99	99	99	99	99
687	SLV_TN_687	21	1	7	20	1	3	5	5	1	11	11	0	0	1	0	1	0	1	1	0	0	0	0	5	5	4	4	5	4	4	2	1	1	1	2	5	1	1	1	1	1
689	SLV_TN_689	21	1	7	20	1	4	1	5	1	3	3	0	1	0	0	1	0	1	1	0	0	1	0	5	5	1	1	4	5	1	5	4	1	4	3	1	1	1	1	1	1
690	SLV_TN_690	21	1	7	20	2	4	3	3	1	11	11	1	0	0	0	0	0	1	1	0	0	0	0	4	2	4	3	5	3	4	4	99	99	99	99	99	99	99	99	99	99
691	SLV_TN_691	21	1	7	21	2	4	3	3	3	3	3	0	0	0	0	0	0	1	0	0	0	0	0	5	4	3	4	4	4	3	3	5	3	4	3	1	2	2	2	1	2
692	SLV_TN_692	21	1	7	19	2	1	3	3	3	11	11	0	0	0	0	0	0	1	1	0	0	1	0	5	3	5	1	5	5	5	3	1	1	5	1	1	1	1	1	1	1
693	SLV_TN_693	21	1	7	19	2	1	3	4	1	11	11	0	1	0	0	0	0	1	1	0	0	0	0	5	5	5	4	5	4	5	2	1	1	2	1	1	2	1	1	2	1
694	SLV_TN_694	21	1	7	19	2	1	3	2	3	3	3	1	0	0	0	0	0	1	1	0	0	1	0	3	4	3	4	5	5	4	3	5	4	4	5	4	3	1	1	5	3
695	SLV_TN_695	21	1	7	20	2	1	2	3	2	9	12	0	0	0	0	0	0	0	0	0	0	1	99	4	4	3	3	5	4	3	3	4	4	3	3	1	3	3	3	4	3
696	SLV_TN_696	21	1	7	19	2	1	2	4	1	3	3	1	0	0	0	0	0	1	0	0	0	1	0	5	4	5	4	5	4	5	4	5	5	4	5	4	4	4	5	5	4
697	SLV_TN_697	21	1	7	20	2	1	4	3	3	3	3	0	0	0	0	0	0	1	1	0	0	1	1	5	5	3	4	5	5	5	3	4	4	5	3	1	5	1	3	2	1
698	SLV_TN_698	21	1	7	19	2	1	4	5	1	11	11	0	1	0	0	0	0	1	0	0	0	1	0	5	5	5	3	5	4	5	4	3	1	1	1	1	2	1	1	1	1
699	SLV_TN_699	21	1	7	21	2	1	1	5	1	2	2	0	0	1	0	0	0	1	0	0	0	0	0	5	4	5	1	4	1	5	5	99	99	99	99	99	99	99	99	99	99
700	SLV_TN_700	21	1	7	19	2	2	3	3	3	11	11	0	0	0	0	0	0	1	0	0	0	0	0	5	5	5	5	5	3	4	4	1	1	1	1	1	1	1	1	1	1
701	SLV_TN_701	21	1	7	20	2	4	1	3	3	3	3	0	0	0	0	0	0	1	1	0	0	1	0	5	1	3	2	5	5	5	1	5	5	5	5	4	5	5	5	5	5
702	SLV_TN_702	21	1	7	20	1	1	4	5	1	3	3	0	0	1	0	0	0	1	0	0	0	0	0	5	5	5	1	5	5	5	1	3	3	3	5	5	3	3	3	5	3
704	SLV_TN_704	21	1	7	19	2	4	1	5	1	11	11	0	0	0	0	1	0	1	1	0	0	1	1	5	4	4	3	5	3	5	4	2	1	1	1	1	2	1	1	2	1
705	SLV_TN_705	21	1	7	21	2	4	4	5	1	3	3	0	1	1	1	1	0	1	1	0	0	1	0	5	2	5	2	5	2	5	1	5	5	5	4	5	5	4	4	5	5
706	SLV_TN_706	21	1	7	19	2	1	3	3	2	2	2	0	0	1	0	0	0	0	0	0	0	0	0	5	4	3	3	5	5	5	3	3	4	3	5	4	4	3	2	4	1
707	SLV_TN_707	21	1	7	19	2	5	2	3	3	3	3	0	0	0	1	0	0	0	0	1	0	0	0	2	5	3	4	5	5	4	5	5	4	3	5	2	3	3	3	3	3
708	SLV_TN_708	21	1	7	19	2	3	6	3	1	3	3	1	0	0	0	0	1	1	1	0	0	0	1	5	3	5	3	4	4	5	3	5	5	5	5	4	5	4	5	4	4
709	SLV_TN_709	21	1	7	19	2	5	6	5	1	3	3	0	0	1	1	0	0	1	0	0	0	0	0	4	2	4	5	5	4	4	3	5	4	4	5	4	5	5	4	3	4
710	SLV_TN_710	21	1	7	19	2	4	2	4	3	3	3	0	1	0	0	0	0	1	0	0	0	0	0	5	4	4	2	5	1	5	3	4	2	1	3	1	2	1	1	1	1
711	SLV_TN_711	21	1	7	19	2	3	6	5	1	3	3	0	0	0	0	0	0	1	1	0	0	1	0	5	5	4	5	5	1	5	4	5	5	3	5	4	4	4	4	5	4
712	SLV_TN_712	21	1	7	19	2	5	5	5	2	11	11	0	0	0	1	1	0	1	1	0	0	0	0	5	5	3	3	5	5	5	5	2	3	3	1	1	4	3	1	1	1
713	SLV_TN_713	21	1	7	19	2	5	6	3	2	3	3	0	0	0	0	0	0	1	1	0	0	0	0	5	5	5	4	2	4	4	4	5	5	5	5	5	5	5	5	5	5
714	SLV_TN_714	21	1	7	20	2	5	3	4	1	2	2	0	0	0	1	0	0	1	1	0	0	1	0	5	3	3	5	5	4	4	5	4	4	2	2	1	3	1	2	4	1
715	SLV_TN_715	21	1	7	20	2	5	3	5	1	3	3	0	0	0	0	0	0	1	1	0	0	1	0	5	4	4	3	5	3	5	5	99	99	99	99	99	99	99	99	99	99
716	SLV_TN_716	21	1	7	19	2	3	5	4	2	11	11	0	0	0	0	0	0	1	0	0	0	1	0	5	5	3	3	3	3	5	3	1	1	1	1	1	1	1	1	1	1
717	SLV_TN_717	21	1	7	19	2	5	4	5	1	3	3	1	0	1	0	0	0	1	1	0	0	1	0	5	5	4	5	5	3	5	5	3	3	4	3	2	3	1	2	2	2
718	SLV_TN_718	21	1	7	19	2	1	3	3	3	3	3	0	1	0	0	0	0	1	1	0	0	1	0	4	5	4	4	5	3	4	4	3	2	2	3	4	2	1	1	2	1
719	SLV_TN_719	21	1	7	19	2	5	4	3	1	3	3	0	1	0	0	1	0	1	0	0	0	1	0	4	4	3	2	3	3	3	2	5	3	3	4	3	4	5	4	5	4
720	SLV_TN_720	21	1	7	20	2	5	2	5	2	3	3	0	0	0	0	0	0	1	1	0	0	1	1	5	5	3	3	5	5	5	5	5	1	1	5	1	5	1	1	5	1
721	SLV_TN_721	21	1	7	19	1	5	4	3	1	11	11	0	0	1	0	0	0	1	0	0	0	1	0	5	5	5	2	5	3	5	3	1	1	1	1	1	2	1	1	1	1
722	SLV_TN_722	21	1	7	19	2	5	2	5	1	3	3	0	0	0	0	0	0	1	0	0	0	1	0	5	5	5	5	5	5	5	5	5	5	5	4	5	5	4	3	5	3
723	SLV_TN_723	21	1	7	20	2	4	4	4	2	3	3	0	0	0	0	1	0	0	1	0	0	0	0	3	5	5	3	5	5	3	1	5	5	4	5	2	5	5	5	5	5
724	SLV_TN_724	21	1	7	19	2	5	4	3	2	3	3	0	0	0	0	0	1	1	1	0	0	0	0	4	5	3	2	5	5	3	1	5	5	5	5	5	5	3	3	5	3
726	SLV_TN_726	21	1	7	19	2	5	3	2	2	12	12	0	0	0	0	0	0	1	0	0	0	1	0	3	3	3	3	3	3	3	3	1	1	1	1	5	5	3	1	1	1
728	SLV_TN_728	21	1	7	19	2	4	5	3	2	3	3	0	0	0	0	0	0	1	1	0	0	0	0	5	3	3	3	3	4	2	3	5	3	3	2	5	3	5	5	5	5
729	SLV_TN_729	21	1	7	20	2	5	5	4	3	2	2	0	0	0	0	0	0	1	1	0	0	0	0	5	3	4	3	5	5	4	3	4	4	3	3	2	4	2	3	4	3
730	SLV_TN_730	21	1	7	19	2	5	3	3	2	3	3	1	0	0	0	1	0	1	1	0	0	1	1	5	3	5	3	5	5	4	3	5	5	4	3	3	4	5	4	3	2
731	SLV_TN_731	21	1	7	19	2	4	4	5	1	3	3	0	0	0	0	0	0	1	1	0	0	0	1	1	1	4	3	5	2	4	2	5	5	5	5	5	5	4	4	5	4
732	SLV_TN_732	21	1	7	19	2	5	4	3	2	3	3	0	0	0	0	0	1	1	0	0	0	1	0	5	5	5	2	5	5	4	5	5	5	4	5	4	4	4	4	4	3
733	SLV_TN_733	21	1	7	19	2	4	3	5	1	11	11	1	0	1	0	0	0	1	1	0	0	1	0	4	4	3	1	5	4	4	3	4	4	4	4	2	4	2	2	4	2
734	SLV_TN_734	21	1	7	20	2	4	3	4	1	3	3	0	0	0	0	0	0	1	0	0	0	1	0	2	4	3	4	4	3	3	4	5	4	4	5	5	5	5	3	4	3
735	SLV_TN_735	21	1	7	19	2	5	4	4	2	3	3	0	0	0	1	1	0	0	0	0	0	1	1	5	4	3	3	5	2	5	4	5	4	4	5	3	5	4	3	2	2
736	SLV_TN_736	21	1	7	19	2	3	4	2	2	3	3	0	0	0	1	0	0	1	1	0	0	0	0	2	5	5	3	1	1	2	5	5	5	5	5	5	5	5	5	5	5
737	SLV_TN_737	21	1	7	20	2	4	4	5	3	3	3	0	0	0	0	0	0	1	0	0	0	0	0	3	4	3	4	3	4	2	3	5	5	5	5	2	5	5	4	5	3
738	SLV_TN_738	21	1	7	19	2	4	4	3	2	3	3	0	0	1	0	1	0	1	0	0	0	1	0	5	3	4	2	5	5	4	5	5	5	5	5	5	5	5	5	5	5
739	SLV_TN_739	21	1	7	19	2	5	5	3	1	3	3	1	0	1	0	0	1	1	1	0	0	1	0	5	3	3	4	3	2	3	4	5	5	5	5	5	5	5	5	5	5
740	SLV_TN_740	21	1	7	19	2	4	4	3	3	3	3	1	0	1	0	0	0	1	0	0	0	1	0	3	3	1	3	3	3	3	3	5	5	5	5	5	5	5	5	5	5
741	SLV_TN_741	21	1	7	22	2	3	6	5	1	2	2	0	0	0	0	0	0	1	1	0	0	0	0	3	2	2	3	4	4	4	1	5	5	5	5	4	5	5	5	5	5
742	SLV_TN_742	21	1	7	20	2	3	4	5	1	3	3	0	0	1	1	1	0	1	1	0	0	1	0	5	5	4	5	5	5	5	5	99	99	99	99	99	99	99	99	99	99
743	SLV_TN_743	21	1	7	19	2	3	3	3	2	3	3	0	0	0	0	0	0	1	1	0	0	0	1	5	3	5	3	4	5	5	5	99	99	99	99	99	99	99	99	99	99
744	SLV_TN_744	21	1	7	19	2	4	5	4	3	3	3	0	0	0	0	0	0	1	0	0	0	1	0	4	4	3	3	4	4	3	2	99	99	99	99	99	99	99	99	99	99
745	SLV_TN_745	21	1	7	19	2	4	5	5	1	3	3	0	0	0	0	0	0	1	1	0	0	1	1	4	4	4	2	5	4	5	3	5	5	3	5	3	5	4	4	5	4
746	SLV_TN_746	21	1	7	19	2	3	5	5	1	2	2	0	0	0	0	0	0	1	1	99	0	1	0	5	5	5	1	5	4	5	5	5	5	5	5	4	5	5	5	5	5
747	SLV_TN_747	21	1	7	19	2	5	4	5	1	3	3	0	0	0	0	1	0	1	1	0	1	0	0	5	4	5	2	5	2	5	3	5	5	5	5	5	4	3	3	3	5
748	SLV_TN_748	21	1	7	19	2	5	5	5	1	3	3	0	0	0	0	0	0	0	0	0	0	0	0	5	4	4	2	5	4	5	5	5	5	5	4	5	5	5	5	5	5
749	SLV_TN_749	21	1	7	21	2	5	2	3	2	3	3	0	0	0	0	1	0	0	0	0	0	0	0	5	5	4	2	5	5	3	3	5	4	3	3	3	2	4	3	3	3
750	SLV_TN_750	21	1	7	19	2	3	5	3	1	3	3	0	0	0	0	0	0	0	0	0	0	0	0	4	3	3	4	4	4	4	4	5	4	5	4	2	4	2	2	3	3
751	SLV_TN_751	21	1	7	19	2	5	5	4	1	3	3	0	0	0	0	0	0	0	0	0	0	1	0	5	5	5	2	5	3	5	5	5	5	5	5	1	4	4	4	5	5
752	CR_OS_752	5	2	8	19	2	5	4	5	1	3	3	1	0	1	0	1	1	1	1	0	0	0	0	4	3	3	2	4	4	4	1	5	5	5	5	3	4	2	2	5	4
753	CR_OS_753	5	2	8	18	2	5	3	5	1	3	3	0	0	0	0	0	0	1	1	0	0	0	1	5	2	4	5	4	4	4	1	1	1	1	1	1	1	1	1	1	1
754	CR_OS_754	5	2	8	18	1	5	3	5	1	3	3	1	0	1	0	1	1	1	1	99	1	0	1	4	4	4	5	5	5	4	5	2	2	2	2	2	1	1	2	1	1
756	CR_OS_756	5	2	8	19	2	4	6	4	1	3	3	0	1	0	0	0	0	1	1	1	0	1	0	4	2	2	4	4	2	4	1	5	5	5	5	4	5	4	4	4	5
757	CR_OS_757	5	2	8	20	2	5	4	4	1	3	3	0	1	0	0	1	0	1	1	0	0	0	0	5	4	4	3	5	5	5	3	5	5	4	4	4	5	4	4	5	4
758	CR_OS_758	5	2	8	18	2	5	4	5	1	3	3	0	1	0	0	0	0	0	0	0	0	0	0	5	5	5	5	5	4	5	4	99	99	99	99	99	99	99	99	99	99
759	CR_OS_759	5	2	8	18	2	2	7	4	1	3	3	0	0	1	0	1	0	1	1	0	0	0	0	5	3	5	5	5	3	5	4	3	2	1	2	1	2	2	1	2	1
760	CR_OS_760	5	2	8	18	2	5	2	5	1	3	3	0	0	0	0	0	0	1	1	0	0	0	0	3	2	99	4	5	1	5	5	5	5	4	5	5	5	5	5	5	5
761	CR_OS_761	5	2	8	19	2	4	4	5	1	11	11	1	0	1	0	1	0	1	1	0	0	1	0	5	2	5	4	5	1	5	2	1	1	1	1	1	1	1	1	2	1
762	CR_OS_762	5	2	8	20	2	5	1	3	3	3	3	0	0	0	0	1	0	1	1	0	0	0	0	3	1	3	3	4	2	3	2	5	5	5	5	5	5	4	4	5	5
763	CR_OS_763	5	2	8	20	2	2	4	4	1	3	3	0	0	0	0	0	0	1	1	0	0	0	0	5	4	4	3	5	4	4	4	5	4	4	5	4	2	5	3	2	4
764	CR_OS_764	5	2	8	18	2	3	4	4	2	3	3	0	0	1	0	0	0	1	0	0	0	0	0	5	4	4	3	4	3	4	3	5	5	5	5	5	5	5	5	4	5
765	CR_OS_765	5	2	8	19	1	2	7	5	1	3	3	0	0	0	0	0	1	1	1	0	0	0	0	5	5	5	5	5	5	5	5	1	1	1	1	1	1	1	1	1	1
766	CR_OS_766	5	2	8	19	1	2	3	4	1	3	3	1	0	0	0	0	1	1	0	1	0	0	0	4	4	5	4	5	4	5	4	3	3	4	2	2	3	3	2	4	2
767	CR_OS_767	5	2	8	20	2	3	4	4	1	3	3	0	0	0	0	1	0	1	1	0	0	0	0	5	3	4	5	5	5	5	3	5	5	4	5	3	5	4	4	5	5
769	CR_OS_769	5	2	8	19	2	5	5	4	1	3	3	1	0	0	1	0	0	1	0	0	0	0	0	4	3	2	4	4	4	4	4	5	5	4	4	3	4	1	3	1	3
770	CR_OS_770	5	2	8	18	2	5	1	4	1	3	3	0	0	0	0	1	1	1	0	0	0	1	0	5	5	4	4	5	4	5	4	99	99	99	99	99	99	99	99	99	99
771	CR_OS_771	5	2	8	18	2	5	4	4	1	3	3	1	0	0	0	1	1	1	1	0	0	1	0	4	2	4	4	4	3	4	3	5	5	4	5	4	4	4	4	3	4
772	CR_OS_772	5	2	8	19	2	5	3	4	1	4	4	1	0	1	0	1	1	1	1	0	0	1	1	3	5	5	4	5	4	5	3	1	1	1	1	1	1	1	1	1	1
773	CR_OS_773	5	2	8	19	1	5	7	5	1	11	11	1	1	1	1	1	0	1	0	0	0	1	1	5	5	5	5	5	3	5	5	1	1	1	1	1	1	1	1	1	1
774	CR_OS_774	5	2	8	19	2	2	4	4	1	3	3	0	0	1	0	1	1	1	1	0	0	1	0	5	5	5	5	5	3	4	5	5	5	3	4	2	3	3	3	3	3
775	CR_OS_775	5	2	8	18	2	5	3	5	1	3	3	0	0	0	0	0	0	1	0	0	0	0	1	3	2	4	4	4	2	4	4	5	5	2	4	1	4	2	3	5	2
776	CR_OS_776	5	2	8	19	2	4	4	4	1	2	2	0	1	0	0	0	0	0	1	0	0	1	1	3	2	4	4	4	3	4	3	3	3	4	3	3	3	2	2	3	3
777	CR_OS_777	5	2	8	18	2	5	4	4	1	3	3	0	0	0	1	0	0	1	0	0	0	1	1	5	5	3	3	5	4	5	3	3	3	2	2	1	3	1	1	1	2
779	CR_OS_779	5	2	8	19	1	3	3	5	1	99	99	1	0	0	0	0	0	0	0	0	0	1	0	5	2	4	3	5	3	4	2	5	5	4	5	2	5	3	4	5	5
780	CR_OS_780	5	2	8	19	2	5	1	5	1	3	3	0	0	0	0	0	0	1	0	0	0	1	0	5	3	3	3	5	4	3	3	5	5	4	4	5	4	4	5	3	4
782	CR_OS_782	5	2	8	20	2	3	4	5	1	3	3	0	0	1	0	0	0	1	1	1	0	1	0	5	3	5	5	5	5	5	5	1	1	1	1	1	1	1	1	1	1
783	CR_OS_783	5	2	8	21	2	2	5	5	1	11	11	0	1	0	0	0	0	0	0	1	1	0	0	5	4	4	4	4	4	5	4	2	3	1	2	1	2	2	1	1	1
784	CR_OS_784	5	2	8	18	2	5	3	4	1	3	3	1	0	1	0	1	0	1	1	1	0	0	1	4	4	5	3	5	3	3	4	99	99	99	99	99	99	99	99	99	99
785	CR_OS_785	5	2	8	18	1	3	2	5	1	3	3	0	1	0	0	1	0	1	1	0	0	1	0	1	4	4	2	5	2	1	1	5	5	4	4	2	4	2	2	2	2
787	CR_OS_787	5	2	8	19	2	5	4	4	1	3	3	0	0	1	1	1	1	1	1	0	0	0	0	5	4	4	5	4	4	5	3	1	1	5	1	1	1	1	1	1	1
789	CR_OS_789	5	2	8	19	2	3	5	5	1	11	11	0	0	0	0	0	0	0	0	0	0	1	0	5	3	1	1	3	2	3	1	1	1	1	1	1	1	1	1	1	1
790	CR_OS_790	5	2	8	19	2	5	6	5	1	3	3	0	0	1	0	1	1	1	1	0	0	1	1	5	2	4	5	5	4	5	5	5	5	5	5	5	5	4	5	5	5
791	CR_OS_791	5	2	8	19	1	5	4	5	1	3	3	0	1	0	1	0	0	1	1	0	0	99	1	5	3	4	5	4	3	5	5	1	3	4	1	1	1	1	1	1	1
792	CR_OS_792	5	2	8	19	1	3	6	5	1	2	2	0	0	1	0	0	0	1	0	0	0	1	0	5	5	5	5	5	5	5	5	2	2	2	1	1	2	1	1	1	1
793	CR_OS_793	5	2	8	18	2	5	4	5	1	3	3	0	1	1	0	0	0	1	0	0	0	1	1	5	5	5	5	5	5	5	4	5	5	2	5	1	2	4	2	5	2
794	CR_OS_794	5	2	8	19	2	5	6	5	1	3	3	1	0	1	0	1	1	0	0	0	0	1	0	3	3	4	4	4	3	4	2	3	2	4	2	1	1	2	1	2	2
795	CR_OS_795	5	2	8	19	2	5	2	4	1	3	3	0	0	1	0	0	0	1	0	0	0	1	0	5	4	4	4	4	3	4	2	4	4	4	4	3	4	4	3	4	3
796	CR_OS_796	5	2	8	19	2	5	5	5	1	3	3	0	0	1	0	1	1	1	1	0	0	0	1	4	3	5	5	4	2	5	2	3	3	2	2	2	3	2	3	4	3
797	CR_OS_797	5	2	8	18	2	5	4	5	1	3	3	0	1	1	0	1	0	0	0	0	0	1	1	4	4	3	4	4	2	5	2	4	5	3	4	3	4	4	3	3	3
798	CR_OS_798	5	2	8	18	2	5	3	5	1	3	3	0	1	1	0	1	1	0	0	0	0	1	1	5	5	5	5	5	4	5	5	4	4	2	3	2	4	4	1	5	1
799	CR_OS_799	5	2	8	20	2	5	6	4	1	3	3	1	1	1	0	1	0	1	1	0	0	0	1	5	4	4	4	5	3	4	3	5	5	4	4	2	4	2	3	4	2
800	CR_OS_800	5	2	8	19	2	5	4	5	1	3	3	0	0	0	0	0	0	1	0	0	0	1	0	4	3	4	5	4	3	5	4	5	5	5	5	5	5	5	5	5	5
801	CR_OS_801	5	2	8	18	2	5	4	5	1	3	3	0	1	0	0	0	0	1	1	0	0	0	0	4	3	4	4	4	3	4	3	5	5	4	4	3	4	4	3	3	4
802	CR_OS_802	5	2	8	19	2	5	3	5	1	3	3	1	0	0	0	1	1	1	0	0	0	1	0	4	3	4	4	5	3	4	3	5	5	4	5	4	4	4	3	4	4
803	CR_OS_803	5	2	8	18	2	5	4	4	1	3	3	0	1	1	0	1	1	1	1	0	0	1	1	4	4	5	5	5	4	5	4	4	4	3	4	2	3	4	3	2	1
804	CR_OS_804	5	2	8	18	2	5	3	5	1	3	3	0	1	1	0	0	0	1	1	0	0	1	0	5	4	4	4	5	3	5	3	5	5	4	4	3	5	4	3	5	3
805	CR_OS_805	5	2	8	19	2	5	4	5	1	3	3	0	0	0	0	0	0	1	1	0	0	0	0	5	5	5	5	5	5	5	4	2	2	1	1	1	1	1	1	1	1
806	CR_OS_806	5	2	8	18	2	5	5	5	1	3	3	0	1	0	0	0	0	1	0	1	0	1	0	5	3	5	5	5	4	5	5	5	5	3	5	3	4	4	5	5	3
807	CR_OS_807	5	2	8	19	2	5	5	5	1	3	3	1	1	1	0	1	1	1	0	0	0	1	0	4	3	4	4	5	3	5	3	3	3	3	3	3	2	2	2	2	2
808	CR_OS_808	5	2	8	18	2	5	5	5	1	3	3	1	0	1	0	1	0	0	0	0	0	0	1	5	2	4	4	5	3	5	2	4	4	4	4	4	5	5	5	5	4
809	CR_OS_809	5	1	9	19	2	4	6	5	1	3	3	0	0	0	0	0	0	1	1	0	0	0	0	4	4	4	3	4	3	4	2	5	5	5	5	4	5	5	4	5	4
810	CR_OS_810	5	1	9	18	2	5	7	5	1	11	11	0	0	0	0	0	1	1	0	0	0	0	1	5	4	5	3	5	4	5	5	1	1	1	1	1	1	99	99	99	99
811	CR_OS_811	5	1	9	20	2	5	7	5	1	3	3	1	0	0	0	1	0	1	0	0	0	0	0	5	5	5	1	5	4	5	1	5	5	5	5	4	5	3	5	5	3
812	CR_OS_812	5	1	9	20	2	5	7	4	1	11	11	1	0	1	0	1	1	1	0	0	0	0	1	5	5	5	5	5	4	5	4	1	1	1	1	1	1	1	1	1	1
813	CR_OS_813	5	1	9	18	2	5	6	4	1	3	3	1	0	0	0	1	0	1	1	0	0	0	1	5	4	3	3	4	2	4	1	5	5	5	5	5	5	5	5	3	5
814	CR_OS_814	5	1	9	19	1	5	7	4	1	3	3	1	0	0	0	1	1	1	1	0	0	0	0	5	5	5	4	4	5	5	5	2	2	1	1	1	1	1	1	1	1
815	CR_OS_815	5	1	9	19	2	5	7	4	1	2	2	1	1	1	0	1	1	1	0	0	0	0	0	5	4	4	5	5	4	5	5	5	4	2	4	3	5	5	4	5	5
816	CR_OS_816	5	1	9	18	2	5	7	4	1	3	3	1	1	1	0	0	0	1	1	0	0	0	0	5	5	5	4	5	3	5	1	3	4	2	3	1	3	1	2	3	3
817	CR_OS_817	5	1	9	19	1	5	7	4	1	2	2	1	1	1	0	1	0	1	1	0	0	1	0	5	4	5	5	5	5	5	4	5	5	5	4	5	4	4	4	5	3
818	CR_OS_818	5	1	9	18	2	5	7	5	1	11	11	1	1	1	0	1	1	1	1	0	0	1	0	4	3	4	2	4	4	5	2	2	1	1	1	1	1	1	1	1	1
820	CR_OS_820	5	1	9	19	2	4	6	4	1	3	3	0	1	1	0	0	0	1	1	0	0	1	0	4	4	2	2	4	3	3	4	2	2	2	1	1	4	2	1	2	1
821	CR_OS_821	5	1	9	20	2	5	5	5	1	12	12	0	0	0	0	0	0	1	1	0	0	0	0	5	1	4	1	4	3	5	2	1	1	1	1	1	1	1	1	1	1
822	CR_OS_822	5	1	9	19	2	4	6	5	1	3	3	0	0	0	0	0	0	1	1	0	0	1	0	4	3	4	4	5	5	4	5	4	4	4	4	2	4	4	2	1	4
823	CR_OS_823	5	1	9	20	2	5	4	5	1	99	99	1	0	1	99	1	1	1	0	0	0	0	0	5	5	4	4	5	3	5	4	5	5	5	4	5	4	5	5	3	4
824	CR_OS_824	5	1	9	18	2	5	6	5	1	3	3	0	1	0	0	1	0	1	0	0	0	1	99	4	2	4	4	4	3	4	2	2	3	4	2	1	2	2	1	2	1
825	CR_OS_825	5	1	9	19	1	5	4	5	1	12	12	0	0	0	0	0	0	1	1	0	0	0	0	4	1	5	4	5	3	5	2	3	4	3	2	1	3	2	2	4	1
826	CR_OS_826	5	1	9	19	2	5	6	5	1	3	3	99	0	99	0	99	99	1	1	0	0	0	0	5	4	4	4	4	3	5	4	5	5	5	5	4	5	5	5	5	5
827	CR_OS_827	5	1	9	19	2	5	7	5	1	3	3	0	0	1	0	1	0	1	1	0	0	0	1	5	5	5	3	5	3	5	3	4	4	4	4	3	4	1	2	3	2
828	CR_OS_828	5	1	9	19	2	5	6	5	1	13	12	1	0	1	0	1	1	1	0	0	0	1	1	5	5	4	5	4	5	4	5	1	1	1	1	1	1	1	1	1	1
830	CR_OS_830	5	1	9	19	2	5	7	5	1	3	3	0	0	0	0	1	0	0	0	0	0	0	1	4	4	3	4	5	4	5	3	4	5	4	4	3	4	4	4	3	3
832	CR_OS_832	5	1	9	18	2	5	7	5	1	3	3	1	1	1	0	1	1	1	1	0	0	1	1	5	2	4	4	4	3	5	3	5	5	5	5	5	3	2	3	5	3
833	CR_OS_833	5	1	9	19	2	5	7	5	1	3	3	0	1	0	0	0	0	0	0	0	0	0	1	5	5	5	1	5	5	5	1	5	5	5	5	5	5	5	5	5	5
834	CR_OS_834	5	1	9	19	2	5	5	4	1	3	3	0	0	0	0	0	0	1	1	0	0	1	0	4	2	4	2	4	3	4	1	5	5	5	5	5	5	5	5	5	5
835	CR_OS_835	5	1	9	19	2	5	5	5	1	3	3	0	0	0	0	0	0	1	1	0	0	1	0	5	4	4	4	5	3	4	4	5	5	5	4	4	5	5	4	5	4
838	CR_OS_838	5	1	9	19	1	5	7	5	1	10	12	1	0	1	1	1	1	1	1	0	0	0	1	5	3	4	2	5	5	5	2	99	99	99	99	99	99	99	99	99	99
839	CR_OS_839	5	1	9	18	2	5	6	5	1	3	3	0	0	0	0	1	1	1	0	0	0	1	0	2	5	5	5	5	4	5	5	4	4	4	3	1	2	1	1	4	1
840	CR_OS_840	5	1	9	18	2	5	6	5	1	3	3	1	0	0	0	0	0	1	0	0	0	0	0	5	2	4	5	4	4	5	3	4	3	4	3	2	3	3	2	3	2
841	CR_OS_841	5	1	9	19	1	5	6	4	1	3	3	1	1	0	0	1	1	1	0	0	0	1	0	5	3	4	4	5	5	5	3	5	4	5	5	4	5	4	4	5	5
843	CR_OS_843	5	1	9	19	1	5	7	4	1	13	12	0	0	1	0	1	0	1	1	0	0	0	0	5	5	5	5	5	5	5	5	1	1	1	1	1	1	1	1	1	1
844	CR_OS_844	5	1	9	20	2	5	6	5	1	13	12	1	0	1	1	1	1	1	1	0	0	0	0	5	3	5	5	5	3	5	3	99	99	99	99	99	99	99	99	99	99
845	CR_OS_845	5	1	9	19	2	5	6	5	1	3	3	0	0	0	0	1	1	0	0	0	0	1	0	5	5	4	5	5	3	5	4	5	5	4	5	4	4	4	5	3	4
846	CR_OS_846	5	1	9	19	2	5	7	5	1	3	3	0	0	0	0	0	0	1	1	0	0	0	0	5	5	5	1	5	3	5	3	3	3	4	3	3	4	4	3	4	3
847	CR_OS_847	5	1	9	19	2	5	6	5	1	3	3	1	1	1	0	1	1	1	1	0	0	0	0	4	5	3	4	5	2	5	4	2	2	2	2	1	4	1	1	1	1
848	CR_OS_848	5	1	9	19	1	5	6	5	1	13	12	1	0	1	0	1	1	1	1	0	0	1	1	5	4	4	3	5	2	4	3	99	99	99	99	99	99	99	99	99	99
849	CR_OS_849	5	1	9	19	2	5	7	5	1	3	3	0	1	1	0	1	1	1	1	0	0	1	1	1	4	4	5	4	2	5	5	5	5	4	2	3	2	1	4	1	1
850	CR_OS_850	5	1	9	19	1	5	6	5	1	3	3	1	0	1	0	1	1	1	1	0	0	0	1	5	4	4	3	5	5	5	4	99	99	99	99	99	99	99	99	99	99
851	CR_OS_851	5	1	9	18	2	5	7	5	1	13	12	1	0	0	0	1	1	1	1	0	0	1	0	5	5	5	3	5	4	5	4	3	3	2	2	2	3	3	2	1	2
852	CR_OS_852	5	1	9	19	2	5	5	5	1	3	3	0	0	1	0	1	0	1	0	0	0	0	0	5	3	5	4	5	3	5	3	4	3	3	3	2	3	2	2	1	1
853	CR_OS_853	5	1	9	19	1	5	5	4	1	3	3	1	0	1	0	1	1	1	1	0	0	0	0	4	5	5	4	5	3	5	4	4	4	3	3	3	3	1	3	3	3
854	CR_OS_854	5	1	9	19	1	5	6	5	1	11	11	1	0	1	0	1	1	1	0	0	0	1	1	5	5	4	5	4	5	4	5	1	1	1	1	1	1	1	1	1	1
855	CR_OS_855	5	1	9	18	2	5	6	5	1	3	3	0	0	1	0	1	0	1	0	0	0	1	1	5	4	3	4	5	3	4	4	2	1	1	1	2	1	2	1	1	1
856	CR_OS_856	5	1	9	18	2	5	7	5	1	3	3	1	0	0	1	1	1	1	0	0	0	1	0	5	5	5	5	5	5	5	5	5	5	5	5	4	5	4	4	1	4
857	CR_OS_857	5	1	9	18	2	5	7	5	1	13	12	0	1	0	0	0	0	1	1	0	0	0	0	5	5	5	3	5	3	5	5	3	3	3	3	3	3	3	3	3	3
859	CR_OS_859	5	1	9	19	1	5	5	5	1	11	11	1	0	1	1	1	1	1	1	0	0	1	0	5	5	5	5	5	4	5	5	1	1	1	1	1	1	1	1	1	1
860	CR_OS_860	5	1	9	19	2	5	6	4	1	3	3	0	1	0	0	0	1	1	1	1	0	1	1	3	2	4	4	5	3	5	3	3	2	4	2	1	2	2	3	3	3
861	CR_OS_861	5	1	9	20	2	4	7	5	1	3	3	1	0	0	0	0	0	0	0	0	0	1	0	4	2	4	5	5	2	5	1	5	5	5	5	5	5	5	5	5	5
862	CR_OS_862	5	1	9	19	1	5	6	5	1	3	3	1	0	0	0	0	0	1	1	0	0	0	0	5	4	5	5	5	5	5	4	5	5	5	3	3	1	3	4	1	4
863	CR_OS_863	5	1	9	19	2	5	4	5	1	3	3	0	1	0	0	0	0	1	1	0	0	0	1	5	3	4	4	4	2	4	3	4	4	3	3	3	4	3	2	3	3
864	CR_OS_864	5	1	9	19	2	5	7	5	1	3	3	0	1	0	0	1	1	1	1	0	1	0	0	4	3	3	4	4	3	2	3	4	4	3	4	4	4	5	4	4	4
865	CR_OS_865	5	1	9	19	2	4	6	5	1	4	4	1	0	0	0	0	0	1	1	0	0	0	0	5	4	5	5	4	5	5	5	4	2	2	3	2	3	1	2	3	3
866	CR_OS_866	5	1	9	18	2	5	6	4	1	2	2	1	0	0	0	0	1	1	1	0	0	1	1	5	5	4	5	5	4	5	4	4	4	3	2	3	3	2	4	4	3
867	CR_OS_867	5	1	9	20	2	4	6	4	1	3	3	0	1	0	0	1	0	1	1	0	0	1	0	5	4	4	3	5	3	4	5	5	5	5	5	5	5	4	5	5	5
869	CR_OS_869	5	1	9	18	2	5	7	5	1	3	3	0	0	1	0	1	0	1	0	0	0	1	0	5	5	5	5	5	5	5	5	4	1	3	4	1	5	3	2	4	1
870	CR_OS_870	5	1	9	19	2	5	6	4	1	3	3	0	1	1	0	0	1	1	1	0	0	0	0	5	5	5	4	4	4	5	5	4	4	3	3	2	3	4	2	2	2
871	CR_OS_871	5	1	9	18	1	5	6	5	1	12	12	0	0	1	0	1	0	1	1	0	0	0	1	5	5	5	5	5	5	5	5	3	1	1	1	1	1	1	1	1	1
873	IT_VE_873	13	1	10	19	1	5	7	5	1	3	3	1	0	1	0	1	1	1	1	0	0	1	1	5	4	5	4	5	4	4	4	3	3	3	2	1	1	1	1	1	1
874	IT_VE_874	13	1	10	19	2	4	6	4	1	3	3	1	0	1	0	1	1	1	1	0	0	1	0	5	4	5	4	5	4	5	4	5	3	3	4	2	3	2	2	3	2
875	IT_VE_875	13	1	10	19	2	5	7	4	1	6	5	1	1	0	0	1	0	99	0	0	0	1	1	4	3	5	4	4	2	4	4	5	5	5	5	5	5	3	4	5	3
876	IT_VE_876	13	1	10	19	2	5	6	5	1	6	5	1	1	1	0	1	1	1	0	0	0	1	0	3	3	2	3	4	1	3	3	5	5	5	5	4	5	5	5	5	1
877	IT_VE_877	13	1	10	19	2	5	7	5	1	3	3	1	0	0	1	1	1	1	1	1	1	1	0	4	3	5	3	5	4	5	3	5	5	3	5	4	3	2	4	3	3
878	IT_VE_878	13	1	10	18	1	5	6	5	1	3	3	1	0	1	0	1	1	0	0	0	0	1	0	5	4	5	5	5	4	5	5	1	1	1	1	1	1	1	1	1	1
879	IT_VE_879	13	1	10	19	1	5	7	5	1	13	12	1	0	1	1	1	1	1	1	0	0	0	0	4	4	3	3	3	3	3	3	3	3	3	3	3	3	4	2	3	4
880	IT_VE_880	13	1	10	19	1	5	4	2	2	3	3	1	0	1	0	1	0	0	0	0	0	1	0	1	1	5	5	5	1	4	1	2	3	4	3	2	3	3	4	3	1
881	IT_VE_881	13	1	10	18	2	5	6	4	1	3	3	99	0	0	0	0	0	1	1	0	0	0	1	4	5	4	3	4	4	4	4	5	4	4	5	3	5	5	4	5	4
882	IT_VE_882	13	1	10	19	2	3	6	4	1	3	3	0	0	0	0	0	1	0	0	0	0	0	0	4	4	5	5	5	4	5	4	5	5	4	5	4	5	5	5	4	5
883	IT_VE_883	13	1	10	19	1	5	6	4	1	11	11	0	0	1	1	1	1	1	0	1	0	1	0	4	4	4	4	4	3	4	3	99	99	3	1	1	99	99	1	1	1
884	IT_VE_884	13	1	10	19	1	5	5	5	1	11	11	1	0	1	0	1	1	1	1	1	0	1	0	1	3	5	4	5	4	5	3	1	1	1	1	1	1	1	1	1	1
885	IT_VE_885	13	1	10	18	1	5	6	5	1	3	3	1	0	0	0	0	1	0	1	0	0	1	0	4	3	4	4	3	4	3	4	2	1	1	2	2	2	2	2	2	2
886	IT_VE_886	13	1	10	19	1	5	6	5	1	13	12	1	0	1	1	1	1	1	1	1	0	1	0	5	3	4	4	4	2	5	4	1	1	1	1	1	1	1	1	1	1
887	IT_VE_887	13	1	10	20	1	5	7	5	1	3	3	1	0	1	1	1	1	1	1	0	0	1	1	5	4	4	3	5	3	5	3	2	2	3	3	1	2	1	1	2	1
888	IT_VE_888	13	1	10	19	2	5	6	5	1	3	3	0	0	0	0	0	0	1	0	0	0	1	0	4	3	5	4	4	3	5	2	5	4	4	5	2	4	3	3	4	2
889	IT_VE_889	13	1	10	18	2	5	5	4	1	3	3	1	0	1	1	1	1	1	0	1	0	1	0	4	4	5	4	5	4	4	4	3	3	3	3	2	3	2	2	3	2
890	IT_VE_890	13	1	10	19	2	5	5	4	1	3	3	0	0	0	1	1	1	1	0	1	0	1	0	4	4	4	5	4	5	5	5	5	4	3	4	3	4	3	2	3	2
891	IT_VE_891	13	1	10	20	1	5	6	5	1	3	3	1	1	1	0	1	1	1	1	0	0	1	0	5	4	4	4	5	3	5	4	3	2	2	3	3	2	2	2	2	2
892	IT_VE_892	13	1	10	19	1	4	6	5	1	11	11	1	0	1	0	1	1	1	1	0	0	1	0	4	4	5	4	5	2	3	4	1	1	1	1	1	1	1	1	1	1
893	IT_VE_893	13	1	10	19	1	5	6	5	1	3	3	0	0	0	0	0	0	1	1	0	0	1	1	5	5	4	1	5	5	5	1	2	3	3	2	1	3	1	2	5	1
894	IT_VE_894	13	1	10	19	2	5	7	4	1	3	3	1	0	1	1	1	1	1	1	0	0	1	0	5	5	5	3	4	2	5	2	2	2	4	3	3	4	2	2	2	2
895	IT_VE_895	13	1	10	19	2	5	99	5	1	3	3	1	0	1	0	1	0	1	1	0	0	0	0	4	2	4	4	4	2	2	4	4	4	4	4	2	4	4	4	4	2
896	IT_VE_896	13	1	10	19	2	5	6	4	1	3	3	1	0	0	0	0	0	1	0	0	0	1	0	3	4	4	4	4	4	4	5	4	3	4	4	5	3	3	5	4	2
897	IT_VE_897	13	1	10	18	2	5	6	4	1	3	3	1	0	1	0	1	1	1	1	0	0	1	0	5	5	5	4	5	2	5	4	2	2	2	2	1	2	2	1	1	1
898	IT_VE_898	13	1	10	19	2	5	7	4	1	4	4	1	1	1	1	1	1	1	1	0	0	1	0	5	4	4	5	5	4	5	4	1	1	1	1	1	1	1	1	1	1
899	IT_VE_899	13	1	10	19	2	5	6	5	1	3	3	1	0	0	0	1	0	1	1	1	0	0	0	5	5	5	5	4	4	5	5	4	3	3	4	3	2	2	4	2	1
900	IT_VE_900	13	1	10	19	2	4	7	4	1	11	11	1	0	1	0	1	1	1	1	1	0	1	0	4	2	4	4	5	1	5	3	2	2	1	1	1	1	1	1	1	1
901	IT_VE_901	13	1	10	20	1	2	6	4	1	11	11	1	0	1	0	1	0	0	0	0	0	0	0	2	2	4	4	4	4	4	4	1	2	2	2	1	2	1	4	2	1
902	IT_VE_902	13	1	10	19	1	5	6	4	1	3	3	1	0	1	0	1	1	1	0	0	0	0	0	4	4	4	4	4	4	4	3	3	3	4	3	3	3	2	3	3	2
904	IT_VE_904	13	1	10	19	2	3	6	4	1	3	3	1	0	1	0	1	1	1	1	1	0	0	1	4	4	4	4	4	3	4	3	4	3	3	4	3	2	4	3	4	2
905	IT_VE_905	13	1	10	19	2	3	6	4	1	11	11	1	0	1	0	1	1	1	0	0	0	0	0	4	3	5	5	5	4	5	4	1	1	1	1	1	1	1	1	1	1
907	IT_VE_907	13	1	10	18	2	5	7	4	1	3	3	1	1	1	0	1	1	1	0	0	0	1	0	5	2	5	4	5	2	5	2	3	3	3	2	2	3	3	2	3	2
908	IT_VE_908	13	1	10	19	1	3	6	4	1	13	12	1	0	0	0	0	0	0	0	0	0	1	0	5	5	5	4	5	4	5	3	2	2	2	2	1	2	2	2	2	2
909	IT_VE_909	13	1	10	19	2	3	6	4	1	3	3	0	0	1	0	1	0	1	1	0	0	1	0	5	1	5	4	5	4	5	4	2	2	1	1	1	1	1	1	1	1
910	IT_VE_910	13	1	10	19	1	5	7	5	1	6	5	1	0	1	0	1	1	1	0	0	0	1	0	4	5	99	5	5	5	5	5	5	3	2	4	2	3	99	5	2	1
911	IT_VE_911	13	1	10	20	2	5	6	5	2	3	3	1	0	1	0	0	1	1	1	1	0	0	0	3	4	5	4	5	3	5	4	5	5	5	5	5	5	5	5	5	5
912	IT_VE_912	13	1	10	19	2	5	6	4	1	3	3	1	0	1	0	1	1	1	1	0	0	0	1	5	4	5	5	5	4	5	4	4	4	4	4	1	3	1	2	4	1
913	IT_VE_913	13	1	10	19	1	5	7	5	1	3	3	1	0	1	0	1	1	1	1	0	0	0	1	5	3	5	4	4	5	5	3	4	4	2	4	1	2	1	3	4	1
914	IT_VE_914	13	1	10	19	2	5	5	4	1	3	3	1	0	1	1	1	1	1	1	0	0	1	0	5	4	4	3	5	4	5	5	1	1	1	1	1	1	1	1	1	1
915	IT_VE_915	13	1	10	19	2	5	6	4	1	3	3	1	0	0	0	1	1	1	1	0	0	0	1	4	4	4	4	4	4	5	5	5	5	4	5	4	5	5	4	5	4
916	IT_VE_916	13	1	10	19	1	5	6	4	1	3	3	1	0	1	1	1	1	1	1	1	0	0	0	5	5	5	5	5	5	5	5	1	1	1	1	1	1	1	1	1	1
917	IT_VE_917	13	1	10	19	2	4	5	4	1	3	3	0	0	1	1	0	0	1	1	1	0	1	1	4	3	4	2	5	2	4	4	3	3	3	3	2	2	3	2	2	2
918	IT_VE_918	13	1	10	19	2	4	6	5	1	3	3	0	0	0	0	1	0	0	0	0	0	1	0	5	4	5	3	5	4	5	3	4	4	4	4	3	4	4	99	4	99
919	IT_VE_919	13	1	10	19	1	5	7	5	1	3	3	0	0	1	0	1	1	1	0	1	0	0	0	5	4	4	3	4	3	5	4	99	99	99	99	99	99	99	99	99	99
920	IT_VE_920	13	1	10	18	2	3	7	4	2	13	12	0	0	0	0	1	1	1	0	0	0	0	0	5	4	5	5	5	4	4	4	1	1	1	1	1	1	1	1	1	1
921	IT_VE_921	13	1	10	18	2	4	7	5	1	13	12	1	1	1	1	1	1	1	1	0	0	1	1	5	4	5	5	5	5	5	4	5	99	99	99	99	1	1	5	1	5
922	IT_VE_922	13	1	10	19	2	5	6	5	3	3	3	1	0	1	1	1	1	1	1	1	0	1	0	5	3	5	5	4	2	5	4	3	2	2	3	1	2	2	3	2	1
923	IT_VE_923	13	1	10	19	3	4	6	3	2	11	11	1	0	1	0	1	0	0	0	0	0	0	1	4	1	4	2	5	1	4	2	1	1	2	1	1	1	1	1	1	1
924	IT_VE_924	13	1	10	19	2	2	6	5	1	3	3	1	0	1	0	1	0	1	1	0	0	0	0	5	1	4	5	5	3	5	2	5	4	3	4	99	3	3	4	5	3
925	IT_VE_925	13	1	10	19	2	3	7	5	2	3	3	0	0	1	1	1	0	0	1	0	0	0	0	4	3	4	4	5	2	4	4	1	1	1	1	1	1	1	1	3	1
926	IT_VE_926	13	1	10	19	2	4	6	5	1	3	3	1	0	1	0	1	1	1	1	0	0	1	1	1	4	5	5	5	4	3	5	1	1	1	1	1	1	1	1	1	1
927	IT_VE_927	13	1	10	18	2	4	7	5	1	3	3	0	0	0	0	0	0	1	0	0	0	0	0	4	4	5	4	5	5	4	5	1	1	2	1	1	1	1	1	1	1
928	IT_VE_928	13	1	10	19	2	5	6	5	1	3	3	1	1	1	1	0	0	1	0	0	0	1	1	4	2	4	3	4	2	4	3	4	4	4	3	2	4	2	3	4	2
929	IT_VE_929	13	1	10	19	1	3	6	4	2	2	2	0	0	0	0	0	0	1	1	1	0	1	0	4	4	4	4	3	4	4	4	4	3	4	3	1	3	3	3	3	2
930	IT_VE_930	13	1	10	20	1	5	6	4	1	3	3	1	1	1	1	1	1	1	1	0	1	1	0	4	4	4	4	4	4	4	4	3	3	3	3	3	3	3	3	3	3
931	IT_VE_931	13	1	10	19	1	5	7	5	1	3	3	1	1	1	1	1	1	1	1	0	0	99	99	5	5	5	3	5	2	5	5	4	3	2	4	2	1	1	2	1	2
932	IT_VE_932	13	1	10	19	1	5	5	4	1	3	3	1	0	1	0	1	1	1	1	0	0	99	0	4	5	5	4	4	5	4	5	1	1	1	1	1	1	1	1	1	1
933	IT_VE_933	13	1	10	20	1	5	99	5	1	4	4	0	0	1	0	0	0	1	0	0	0	99	1	4	4	4	4	4	4	4	5	2	2	2	2	2	2	1	1	2	2
934	IT_VE_934	13	1	10	19	1	3	6	5	1	12	12	0	0	1	0	1	1	1	1	99	99	1	0	5	5	5	5	5	5	5	5	2	1	3	1	1	2	1	1	2	1
935	IT_VE_935	13	1	10	19	1	5	6	4	1	13	12	1	1	1	0	1	1	1	1	0	0	1	0	5	5	4	4	5	5	5	5	2	2	1	1	1	1	1	1	1	1
936	IT_VE_936	13	1	10	19	2	5	6	4	1	3	3	1	0	1	0	1	1	1	1	1	0	1	99	2	4	4	5	5	4	5	5	2	2	3	1	1	1	1	1	1	1
937	IT_VE_937	13	1	10	19	2	4	6	5	1	3	3	1	0	1	0	1	1	1	1	0	0	1	0	5	4	4	4	5	4	4	4	99	99	99	99	99	99	99	99	99	99
938	IT_VE_938	13	1	10	19	2	5	6	4	1	3	3	1	0	1	0	1	1	1	0	0	0	1	0	5	4	5	5	5	4	5	5	2	1	1	2	1	2	1	1	1	1
939	IT_VE_939	13	1	10	19	1	5	6	5	1	6	5	0	0	1	0	1	1	1	0	0	0	1	0	5	5	5	4	5	4	5	4	1	2	1	1	2	1	1	1	1	1
940	IT_VE_940	13	1	10	19	1	5	7	3	1	3	3	1	0	1	1	1	1	1	1	1	1	1	0	4	1	5	3	5	2	5	2	4	4	5	99	4	99	4	99	99	5
941	IT_VE_941	13	1	10	19	2	5	6	4	1	3	3	0	0	0	0	1	0	1	0	0	0	1	1	5	4	4	3	4	3	5	3	5	4	4	4	4	5	3	3	5	4
942	IT_VE_942	13	1	10	19	2	4	6	4	1	13	12	0	0	0	1	0	0	1	0	0	0	0	1	4	3	4	4	4	3	4	4	1	1	1	1	1	1	1	1	1	1
943	IT_VE_943	13	1	10	19	2	4	6	4	1	13	12	0	0	1	0	1	1	0	1	0	0	0	0	2	2	4	3	4	4	3	2	3	3	3	3	3	3	3	3	3	3
944	IT_VE_944	13	1	10	19	2	5	6	4	1	13	12	1	0	1	0	1	1	1	0	1	0	1	1	4	4	5	4	5	4	5	4	99	99	99	99	99	99	99	99	99	99
945	IT_VE_945	13	1	10	19	1	4	6	4	1	3	3	0	0	1	0	1	1	1	1	0	0	0	0	2	2	5	2	4	3	2	4	2	4	2	2	1	1	1	2	1	1
946	IT_VE_946	13	1	10	20	1	5	7	4	1	3	3	1	1	1	0	1	1	1	1	0	0	1	0	5	3	4	4	5	1	5	4	1	1	1	1	1	1	1	1	1	1
947	IT_VE_947	13	1	10	19	1	5	5	4	1	13	12	0	0	0	1	1	0	1	1	0	0	1	0	4	4	4	5	4	3	4	4	3	2	2	2	2	4	2	2	4	2
948	IT_VE_948	13	1	10	19	1	5	5	4	1	3	3	1	1	1	0	1	1	1	1	0	0	1	0	4	5	4	4	5	3	5	3	99	99	99	99	99	99	99	99	99	99
949	IT_VE_949	13	1	10	19	2	5	6	4	1	3	3	0	0	1	0	0	0	1	0	0	0	1	1	5	3	4	4	5	4	5	4	5	3	4	5	3	4	4	3	5	3
950	IT_VE_950	13	1	10	19	2	99	99	99	1	3	3	1	0	1	0	0	1	1	1	0	0	0	0	4	5	5	3	4	3	5	5	5	5	5	5	5	4	4	5	4	2
951	IT_VE_951	13	1	10	21	1	2	5	5	3	11	11	1	0	1	1	1	1	1	1	0	0	1	0	4	4	4	5	5	4	5	5	1	1	1	1	1	1	1	1	1	1
952	IT_VE_952	13	1	10	19	2	5	7	4	1	3	3	0	0	0	0	0	0	1	0	0	0	0	0	4	5	5	5	5	4	4	3	4	3	3	5	4	4	4	4	5	4
953	IT_VE_953	13	1	10	19	2	5	6	4	1	3	3	1	0	1	0	1	0	1	1	99	0	0	0	4	1	4	4	4	1	4	4	3	4	3	3	3	2	2	4	2	2
954	IT_VE_954	13	1	10	20	2	5	6	4	1	3	3	1	1	1	0	1	0	0	0	0	1	0	1	2	4	4	3	4	4	4	5	2	2	2	2	2	2	2	2	2	2
955	IT_VE_955	13	1	10	19	1	5	6	5	1	3	3	1	0	1	1	1	1	1	1	0	0	0	1	5	5	5	5	5	5	5	5	4	4	4	3	2	3	1	1	1	2
956	IT_VE_956	13	1	10	20	2	5	6	5	1	3	3	1	0	1	1	1	1	1	0	1	1	1	0	5	3	5	5	5	5	5	4	5	5	5	5	5	4	4	4	4	2
957	IT_VE_957	13	1	10	19	2	5	6	5	2	11	11	1	0	0	0	1	1	1	0	0	0	1	0	5	5	5	5	5	3	5	3	2	2	1	1	1	1	1	1	1	1
958	IT_VE_958	13	1	10	19	1	5	5	4	1	3	3	0	0	1	0	1	0	1	1	0	0	0	0	4	5	5	5	5	5	4	4	5	5	5	5	4	4	4	4	5	3
959	IT_VE_959	13	1	10	20	1	1	7	5	1	3	3	1	0	1	0	1	1	1	1	0	0	0	1	5	5	5	5	5	5	5	5	3	3	3	3	1	2	1	1	5	1
960	IT_VE_960	13	1	10	18	2	5	6	4	1	3	3	1	0	1	0	1	1	1	0	0	0	1	0	5	2	5	4	5	4	5	4	4	4	3	4	3	3	3	3	4	2
961	IT_VE_961	13	1	10	20	2	3	6	4	3	3	3	1	0	0	0	1	1	0	0	0	0	1	0	4	2	4	2	3	2	4	4	2	2	2	2	1	4	3	1	2	2
962	IT_VE_962	13	1	10	18	2	2	7	4	1	3	3	1	0	1	0	1	1	1	1	0	0	0	1	4	4	5	1	5	5	5	4	4	3	4	4	2	3	3	2	3	3
963	IT_VE_963	13	1	10	18	1	5	7	5	1	11	11	1	0	1	0	1	1	1	1	1	0	0	0	5	5	5	4	5	5	5	5	1	1	1	1	1	1	1	1	1	1
964	IT_VE_964	13	1	10	19	1	5	7	5	1	3	3	1	0	1	0	1	1	1	1	0	0	0	0	4	5	5	5	5	5	5	5	3	3	3	3	3	3	3	3	3	3
965	IT_VE_965	13	1	10	20	2	4	7	3	1	11	11	0	0	0	0	0	0	1	1	0	0	1	0	3	4	5	5	5	2	3	4	1	1	1	1	1	1	1	1	1	1
966	IT_TR_966	13	2	11	19	2	3	4	5	1	3	3	0	0	1	1	1	1	1	1	0	0	1	1	5	5	4	4	4	3	5	4	4	4	3	4	3	4	4	4	4	3
967	IT_TR_967	13	2	11	19	2	4	3	5	1	3	3	0	0	1	0	1	1	1	1	0	0	1	0	4	3	5	1	5	2	4	1	1	1	2	1	1	1	1	1	1	1
968	IT_TR_968	13	2	11	18	2	4	4	5	1	3	3	0	0	0	0	1	1	1	1	0	0	1	1	5	5	5	5	5	4	5	3	1	1	2	1	1	1	1	1	1	1
969	IT_TR_969	13	2	11	19	1	4	1	5	1	3	3	1	0	1	0	1	1	1	1	0	0	1	0	5	5	5	5	5	5	5	5	3	5	3	4	5	1	1	5	4	2
970	IT_TR_970	13	2	11	21	1	4	4	5	1	11	11	0	0	1	0	1	1	1	1	0	0	0	0	5	5	5	5	5	5	5	5	1	1	1	1	1	1	1	1	1	1
971	IT_TR_971	13	2	11	20	2	5	5	5	2	11	11	0	0	1	0	0	0	0	0	0	0	1	1	5	5	5	5	5	3	5	4	4	4	3	4	4	3	4	3	4	3
972	IT_TR_972	13	2	11	18	2	5	3	5	1	11	11	1	1	0	0	1	1	1	1	1	0	1	0	5	4	5	5	5	1	5	2	1	1	1	1	1	1	1	1	1	1
973	IT_TR_973	13	2	11	18	2	5	3	5	1	3	3	0	0	1	0	1	1	1	0	0	0	1	0	5	3	5	2	4	3	5	2	3	3	4	5	4	5	2	3	3	1
974	IT_TR_974	13	2	11	19	2	5	3	3	1	3	3	0	0	0	0	1	0	1	0	0	0	1	1	5	4	5	4	5	4	5	3	1	1	1	1	1	1	1	1	1	1
975	IT_TR_975	13	2	11	19	2	5	4	5	1	3	3	1	0	1	0	1	1	1	1	0	0	1	1	5	2	5	3	5	2	5	2	3	1	1	2	1	1	1	1	1	1
976	IT_TR_976	13	2	11	19	1	5	4	5	1	12	12	0	0	1	0	1	1	1	1	0	0	1	1	5	1	5	5	5	4	1	5	1	1	5	1	1	1	1	1	1	1
977	IT_TR_977	13	2	11	19	2	5	99	4	1	3	3	0	0	0	0	0	0	0	0	0	0	0	0	5	1	4	5	5	1	4	1	3	1	1	1	1	2	1	1	1	1
978	IT_TR_978	13	2	11	20	2	4	3	5	1	2	2	0	0	1	0	1	1	1	0	0	0	0	0	5	3	4	4	5	3	5	4	4	4	4	2	1	4	3	2	2	1
979	IT_TR_979	13	2	11	18	2	2	4	4	1	11	11	0	1	0	1	0	0	0	0	0	0	1	0	5	4	5	5	5	5	5	5	1	4	2	1	1	1	1	1	1	1
981	IT_TR_981	13	2	11	19	2	99	5	4	3	3	3	0	0	1	0	1	0	1	1	0	0	1	1	4	4	5	5	5	3	5	3	3	3	1	1	1	1	1	1	1	1
983	IT_TR_983	13	2	11	19	1	5	3	5	1	3	3	0	1	1	0	1	0	1	1	0	0	1	1	5	2	5	4	5	2	4	2	5	5	5	5	1	4	4	5	5	3
984	IT_TR_984	13	2	11	19	2	5	3	5	1	3	3	0	0	1	0	0	0	0	1	0	0	1	0	2	2	5	4	5	4	5	4	5	5	5	5	4	5	5	4	5	4
985	IT_TR_985	13	2	11	19	2	4	5	4	1	4	4	0	0	1	0	1	0	1	1	1	0	0	1	5	4	4	5	4	4	4	3	3	4	3	4	3	4	2	2	3	1
986	IT_TR_986	13	2	11	19	2	1	1	5	1	3	3	0	1	1	0	1	1	0	0	0	0	0	0	4	3	5	4	3	1	5	3	5	5	1	5	1	5	1	5	1	1
987	IT_TR_987	13	2	11	18	1	5	4	5	1	11	11	1	0	1	0	1	0	1	1	0	0	1	1	4	5	5	5	5	3	5	5	2	2	1	4	2	2	1	1	2	2
988	IT_UI_988	13	1	12	19	1	5	6	5	1	3	3	1	0	1	0	1	1	0	0	0	0	1	1	5	3	5	3	5	3	5	3	5	5	3	5	5	5	4	5	5	5
989	IT_UI_989	13	1	12	18	1	5	6	5	99	3	3	99	0	1	0	99	1	0	0	0	0	1	99	3	4	5	2	5	3	3	3	99	99	99	3	3	3	3	99	3	3
990	IT_UI_990	13	1	12	19	1	4	5	4	3	3	3	1	99	1	0	1	1	1	1	0	0	0	1	4	3	4	3	3	3	3	3	99	99	99	99	99	99	99	99	99	99
991	IT_UI_991	13	1	12	19	1	1	6	4	2	3	3	1	1	1	0	1	1	1	0	0	1	0	1	5	4	4	4	4	4	5	3	4	4	4	4	1	1	2	4	4	2
992	IT_UI_992	13	1	12	18	1	3	99	5	1	3	3	0	0	0	0	0	0	1	1	0	0	1	0	5	5	5	5	4	5	5	2	3	3	3	3	5	3	3	3	3	3
993	IT_UI_993	13	1	12	19	2	4	6	3	2	3	3	1	0	0	1	0	0	1	1	0	0	1	1	2	4	4	3	4	3	3	3	4	4	4	4	3	3	2	3	3	2
994	IT_UI_994	13	1	12	19	2	3	6	3	1	3	3	1	0	1	0	1	1	1	1	0	0	0	0	5	2	5	4	5	3	5	3	99	4	99	99	99	3	99	99	99	99
995	IT_UI_995	13	1	12	20	2	1	5	4	3	3	3	0	0	1	0	1	1	1	0	0	0	1	1	5	4	5	3	5	4	5	1	5	5	5	5	5	5	4	5	5	5
996	IT_UI_996	13	1	12	19	1	4	6	4	1	3	3	1	0	1	0	0	1	0	0	0	0	0	1	4	4	3	3	4	3	4	3	5	5	5	5	5	5	5	5	5	5
997	IT_UI_997	13	1	12	19	1	5	6	3	3	11	11	1	0	1	0	1	1	1	1	0	0	99	1	5	3	5	5	5	3	5	3	1	1	1	1	1	3	1	1	3	1
999	IT_UI_999	13	1	12	19	2	3	5	4	1	3	3	0	0	0	0	0	0	1	1	0	0	1	0	5	4	5	4	5	4	5	3	3	3	4	3	2	4	2	2	3	2
1000	IT_UI_1000	13	1	12	20	1	5	99	5	1	3	3	0	0	0	0	0	0	1	0	0	0	1	0	4	4	3	2	5	4	3	2	4	4	4	4	2	3	4	3	3	4
1001	IT_UI_1001	13	1	12	19	1	5	7	3	1	3	3	0	1	0	1	1	99	1	1	0	0	1	1	4	3	4	4	4	4	4	4	3	3	3	3	3	3	3	3	3	3
1002	IT_UI_1002	13	1	12	19	2	3	5	5	1	3	3	0	0	1	0	1	0	1	1	0	0	1	1	3	4	5	2	4	4	4	4	4	4	4	4	2	3	1	3	1	1
1003	IT_UI_1003	13	1	12	19	1	3	6	4	1	3	3	1	0	1	0	1	0	1	1	0	0	0	0	5	4	3	4	5	3	5	4	4	3	3	5	3	4	3	3	3	3
1004	IT_UI_1004	13	1	12	20	1	3	6	3	1	3	3	0	0	1	0	1	1	1	1	0	0	0	1	5	5	5	5	5	4	5	5	3	3	2	2	1	1	2	3	3	1
1006	IT_UI_1006	13	1	12	20	2	2	99	3	2	3	3	1	0	1	0	1	1	1	1	0	0	1	0	5	5	4	4	5	2	5	3	5	4	4	3	3	1	2	2	2	2
1007	IT_UI_1007	13	1	12	19	1	4	6	4	1	3	3	1	0	1	0	1	1	1	1	0	0	1	0	2	4	5	4	4	4	3	4	4	3	3	2	3	2	2	2	3	2
1008	IT_UI_1008	13	1	12	18	1	2	5	5	1	3	3	0	0	0	0	0	0	1	1	0	0	1	1	5	1	4	5	5	1	5	5	1	2	1	1	1	2	4	3	3	1
1009	IT_UI_1009	13	1	12	19	1	5	6	5	2	3	3	1	0	1	0	1	1	0	0	1	0	1	1	5	2	5	3	5	4	5	2	5	4	4	3	1	2	5	4	4	4
1011	IT_UI_1011	13	1	12	20	2	5	7	4	1	2	2	1	0	0	0	1	1	1	1	0	0	1	0	3	4	4	2	4	3	4	3	5	5	5	4	3	5	4	3	4	5
1012	IT_UI_1012	13	1	12	19	2	5	99	4	1	3	3	0	1	1	0	1	0	0	0	0	0	1	0	4	3	5	4	5	2	5	3	4	4	4	4	3	4	3	3	3	2
1013	IT_UI_1013	13	1	12	19	1	5	7	5	1	3	3	1	1	1	1	1	1	1	1	0	0	1	1	5	5	5	5	5	2	5	1	1	1	1	1	1	1	1	1	1	1
1014	IT_UI_1014	13	1	12	19	2	5	99	4	1	3	3	0	0	0	0	0	0	1	0	0	0	1	0	99	4	5	3	5	3	5	4	3	3	2	2	1	4	2	3	2	2
1015	IT_UI_1015	13	1	12	19	1	3	99	4	1	3	3	1	0	1	0	1	1	1	1	0	0	0	0	4	4	5	4	5	4	5	4	3	2	2	2	1	3	2	3	3	2
1016	IT_UI_1016	13	1	12	19	1	5	7	4	1	3	3	0	0	1	0	1	1	1	1	0	0	1	1	99	99	99	99	99	99	99	99	99	99	99	99	99	99	99	99	99	99
1017	IT_UI_1017	13	1	12	20	2	5	6	4	1	13	12	1	0	0	0	0	0	0	0	0	0	1	0	4	3	4	4	5	3	5	3	3	4	4	3	3	3	3	3	3	3
1019	IT_UI_1019	13	1	12	19	1	5	6	3	1	13	12	0	0	1	0	1	1	1	1	0	0	1	0	2	4	5	1	5	2	4	2	1	1	1	1	1	1	1	1	1	1
1020	IT_UI_1020	13	1	12	19	1	4	6	3	1	3	3	1	0	0	0	1	1	1	1	0	0	0	0	4	3	4	4	3	3	4	3	99	99	99	99	99	99	99	99	99	99
1021	IT_UI_1021	13	1	12	19	1	5	6	4	1	3	3	1	0	1	1	1	0	1	1	0	0	0	0	4	4	4	4	4	3	4	3	4	3	99	99	99	99	99	99	99	99
1022	IT_UI_1022	13	1	12	19	1	4	99	5	1	12	12	1	0	1	0	1	1	1	1	0	0	1	1	5	4	5	2	99	3	4	1	5	4	3	2	1	2	3	4	5	4
1023	IT_UI_1023	13	1	12	18	1	4	99	4	1	3	3	1	0	1	1	1	0	1	0	0	0	1	1	4	4	5	3	5	3	5	3	5	3	5	5	4	5	5	4	5	4
1024	IT_UI_1024	13	1	12	19	1	4	5	4	3	3	3	1	0	1	0	1	1	1	1	1	0	1	0	5	4	5	5	4	4	3	3	3	3	3	3	2	3	3	3	3	3
1025	IT_UI_1025	13	1	12	20	1	4	5	3	1	3	3	0	0	0	1	0	99	0	0	0	1	99	1	4	4	4	4	5	4	5	4	4	4	4	3	3	2	3	3	3	4
1026	IT_UI_1026	13	1	12	19	1	3	6	5	1	3	3	1	0	1	0	1	1	1	1	0	0	1	0	4	4	4	4	5	4	4	4	2	2	2	1	1	1	1	1	1	1
1027	IT_UI_1027	13	1	12	19	1	3	5	3	3	3	3	1	0	1	0	1	0	1	1	0	0	1	0	1	3	4	4	5	4	4	5	99	99	99	99	99	99	99	99	99	99
1028	IT_UI_1028	13	1	12	18	1	5	99	4	1	3	3	1	0	1	0	1	1	1	1	0	0	1	0	5	3	4	3	5	4	4	3	99	99	99	99	99	99	99	99	99	99
1029	IT_UI_1029	13	1	12	19	1	5	99	5	1	3	3	1	0	1	0	1	0	1	1	0	0	1	1	5	5	5	5	5	3	5	4	1	1	1	1	1	1	1	1	1	1
1030	IT_UI_1030	13	1	12	19	1	3	6	5	1	3	3	1	0	1	0	1	1	1	1	0	0	1	0	5	1	4	5	4	4	4	1	5	5	5	4	2	5	3	5	5	5
1031	IT_UI_1031	13	1	12	19	1	5	6	5	1	3	3	1	0	1	1	1	1	1	0	1	0	1	1	5	5	5	5	5	5	5	5	1	1	1	1	1	1	1	1	1	1
1032	IT_UI_1032	13	1	12	18	2	5	5	3	1	3	3	1	0	0	0	0	0	1	0	0	0	1	0	4	3	5	3	4	4	4	3	4	4	4	4	4	4	4	4	4	4
1033	IT_UI_1033	13	1	12	20	1	5	99	5	1	3	3	1	0	1	0	1	1	1	1	0	0	0	1	2	4	5	4	3	3	5	3	4	3	4	3	2	4	3	3	3	2
1034	IT_UI_1034	13	1	12	19	1	1	99	4	2	3	3	1	0	0	0	99	0	0	0	0	0	1	0	99	99	99	99	99	99	99	99	99	99	99	99	99	99	99	99	99	99
1035	IT_UI_1035	13	1	12	19	2	5	99	5	1	3	3	1	0	1	1	1	1	0	0	0	0	0	1	3	4	4	4	5	4	5	2	4	4	99	99	99	99	99	99	99	99
1036	IT_UI_1036	13	1	12	18	1	4	6	4	1	13	12	0	0	0	0	0	0	1	0	0	0	1	0	5	5	4	5	5	2	5	5	99	99	99	99	99	99	99	99	99	99
1037	IT_UI_1037	13	1	12	22	1	3	6	4	2	11	11	1	0	1	1	1	1	1	0	1	0	0	0	2	2	2	3	5	1	2	3	99	99	99	99	99	99	99	99	99	99
1038	IT_UI_1038	13	1	12	19	1	3	4	4	1	3	3	1	0	0	0	0	1	1	0	0	0	0	0	4	4	4	4	4	4	4	4	4	4	4	4	2	4	3	2	4	2
1040	IT_UI_1040	13	1	12	19	2	5	6	4	1	11	11	1	0	1	0	1	1	1	1	1	0	0	1	4	4	5	4	5	4	4	5	1	1	1	1	1	2	1	1	1	1
1041	IT_UI_1041	13	1	12	20	1	5	6	5	1	3	3	1	0	1	0	1	1	1	1	0	0	1	0	5	4	5	4	5	2	5	2	5	5	5	4	1	5	2	4	5	3
1042	IT_UI_1042	13	1	12	20	1	5	5	3	1	3	3	1	0	0	0	0	1	1	1	0	0	0	1	4	5	4	5	5	3	5	5	2	2	2	2	2	2	2	2	3	3
1043	IT_UI_1043	13	1	12	18	1	1	5	3	2	3	3	0	0	0	0	0	0	1	99	0	0	0	1	5	4	4	4	4	4	5	3	4	4	3	4	4	4	3	4	3	4
1045	IT_UI_1045	13	1	13	19	2	5	99	5	1	3	3	1	0	1	1	1	1	1	1	0	0	1	0	4	4	4	4	5	3	5	3	3	3	3	3	3	3	3	3	3	3
1046	IT_UI_1046	13	1	13	18	2	5	6	4	1	3	3	0	0	1	0	0	0	1	0	0	0	1	1	5	4	5	4	5	4	5	4	5	4	3	5	4	3	2	4	3	3
1047	IT_UI_1047	13	1	13	19	1	5	99	5	1	3	3	0	0	0	1	0	0	1	1	0	0	1	0	5	4	5	1	4	3	4	2	4	4	4	4	1	3	2	3	4	3
1048	IT_UI_1048	13	1	13	18	1	5	99	4	1	3	3	1	1	1	0	1	1	1	1	1	1	1	0	5	5	5	4	5	4	5	4	4	5	5	4	1	4	4	3	1	1
1049	IT_UI_1049	13	1	13	21	2	5	5	5	1	2	2	0	0	0	0	0	0	1	0	0	0	1	0	5	4	5	4	5	3	5	4	3	3	2	2	1	2	1	2	2	2
1050	IT_UI_1050	13	1	13	19	1	4	5	4	2	11	11	0	0	1	0	1	99	99	99	99	99	99	99	99	99	99	99	99	99	99	99	99	99	99	99	99	99	99	99	99	99
1051	IT_UI_1051	13	1	13	19	2	3	6	5	1	11	11	1	0	1	0	0	0	1	1	0	0	1	1	5	1	5	3	5	2	5	1	1	1	1	1	1	1	1	1	1	1
1052	IT_UI_1052	13	1	13	21	1	5	6	4	1	3	3	1	0	1	0	1	1	1	1	0	0	1	0	4	4	4	4	4	4	4	2	99	99	99	99	99	99	99	99	99	99
1053	IT_UI_1053	13	1	13	20	2	5	6	3	1	3	3	1	0	1	1	1	1	1	0	0	0	1	0	5	4	5	4	5	4	5	4	1	1	1	1	1	1	1	1	1	1
1054	IT_UI_1054	13	1	13	19	2	3	99	3	1	3	3	1	0	1	0	1	1	1	1	0	0	1	0	5	3	5	5	5	3	5	3	4	3	4	4	2	4	2	3	5	1
1055	IT_UI_1055	13	1	13	19	1	4	99	3	1	3	3	1	0	1	1	1	1	0	0	0	0	1	1	4	99	4	4	4	99	99	99	99	99	99	99	99	99	99	99	99	99
1057	IT_UI_1057	13	1	13	19	2	2	6	4	1	11	11	0	0	0	0	0	0	1	0	0	0	1	1	5	3	5	5	5	4	5	3	2	2	2	2	1	2	1	1	3	1
1058	IT_UI_1058	13	1	13	20	2	1	99	3	3	3	3	1	0	1	1	1	1	1	1	1	0	1	0	4	1	4	3	5	3	3	2	99	99	99	99	99	99	99	99	99	99
1059	IT_UI_1059	13	1	13	20	1	4	6	5	1	3	3	1	1	1	0	0	0	1	0	0	1	0	1	5	3	3	5	5	4	4	1	3	3	3	3	1	3	2	2	5	1
1060	IT_UI_1060	13	1	13	19	1	4	6	4	1	3	3	1	0	1	0	1	1	1	1	1	0	0	0	5	3	5	3	5	3	5	3	99	99	99	99	99	99	99	99	99	99
1061	IT_UI_1061	13	1	13	23	1	4	7	4	1	3	3	0	0	1	0	1	1	1	1	0	0	1	1	4	4	5	5	5	4	5	5	4	4	4	4	3	3	2	3	4	2
1062	IT_UI_1062	13	1	13	19	2	5	6	5	1	3	3	0	0	0	0	1	0	1	1	0	0	1	1	99	4	5	4	4	5	4	5	1	1	1	1	1	1	1	1	4	1
1063	IT_UI_1063	13	1	13	19	2	5	6	4	1	3	3	1	0	1	0	1	1	1	1	0	0	1	0	5	1	5	5	5	3	5	5	1	1	1	1	1	1	1	1	1	1
1064	IT_UI_1064	13	1	13	19	1	5	6	5	1	3	3	1	0	0	0	1	0	1	1	0	1	1	0	5	5	5	5	5	5	5	2	5	4	4	5	4	4	4	4	3	5
1065	IT_UI_1065	13	1	13	19	2	2	7	5	1	3	3	1	0	1	0	1	1	1	1	0	0	1	1	3	4	4	5	5	5	1	3	4	4	3	4	5	3	5	5	5	4
1066	IT_UI_1066	13	1	13	19	1	5	5	5	1	3	3	0	1	1	0	1	1	1	0	0	0	1	0	5	4	4	4	5	3	5	5	4	4	4	2	1	3	1	2	2	1
1068	IT_UI_1068	13	1	13	18	2	5	99	4	1	3	3	0	0	1	0	1	1	1	0	0	0	0	0	4	3	4	4	4	3	4	3	5	4	5	4	3	4	1	3	1	3
1069	IT_UI_1069	13	1	13	19	1	3	99	4	1	3	3	0	0	0	0	0	0	1	1	0	0	0	0	5	4	5	4	5	2	5	5	4	3	3	4	3	3	3	3	4	3
1070	IT_UI_1070	13	1	13	19	1	4	6	5	1	3	3	1	0	1	1	1	1	1	1	0	0	0	1	5	3	4	4	4	4	3	3	2	2	2	1	1	2	2	2	2	2
1071	IT_UI_1071	13	1	13	20	1	4	6	4	1	3	3	0	99	99	0	1	1	0	0	0	0	0	0	4	4	3	2	5	2	4	3	4	4	4	4	2	4	3	3	4	2
1072	IT_UI_1072	13	1	13	20	1	1	6	3	1	3	3	0	0	0	0	0	0	1	1	0	0	0	0	5	5	5	4	5	4	5	5	2	3	3	1	1	1	2	1	1	1
1073	IT_UI_1073	13	1	13	20	2	3	6	4	2	3	3	1	0	0	0	1	1	1	0	0	0	1	1	5	3	5	5	5	2	5	5	1	1	1	1	1	1	1	1	1	1
1074	IT_UI_1074	13	1	13	19	1	5	99	5	1	3	3	1	0	1	0	1	1	1	0	0	0	1	1	5	4	5	4	4	3	5	4	3	3	3	2	1	2	1	1	1	1
1075	IT_UI_1075	13	1	13	19	2	5	6	4	1	3	3	1	0	1	0	1	0	1	1	0	0	0	0	5	2	5	4	5	2	5	2	2	3	2	3	1	3	2	1	3	1
1076	IT_UI_1076	13	1	13	19	99	5	4	3	3	3	3	1	0	1	0	1	1	1	1	1	0	1	0	5	3	4	4	5	3	5	4	5	5	5	5	4	5	3	3	5	5
1079	IT_UI_1079	13	1	13	19	1	5	6	4	1	3	3	1	1	1	0	1	1	1	1	0	0	1	0	99	99	99	99	99	99	99	99	5	5	5	5	4	5	4	5	5	4
1080	IT_UI_1080	13	1	13	25	2	5	6	4	1	11	11	1	0	1	0	1	1	1	1	0	0	1	0	5	3	5	4	5	3	5	3	1	2	1	1	1	3	1	1	3	1
1081	IT_UI_1081	13	1	13	18	2	4	6	4	1	3	3	99	0	0	1	1	1	1	1	0	0	0	1	5	4	5	3	4	4	3	1	3	4	5	3	4	5	4	3	4	5
1082	IT_UI_1082	13	1	13	20	1	5	6	5	1	3	3	1	0	1	0	1	1	1	1	0	0	1	1	5	4	4	4	4	1	4	3	5	3	5	4	1	4	2	2	5	1
1083	IT_UI_1083	13	1	13	19	99	4	5	4	1	11	11	0	0	1	0	1	1	1	0	0	0	1	0	2	3	5	4	5	1	4	3	2	1	1	1	1	1	1	1	1	1
1084	IT_UI_1084	13	1	13	19	2	5	6	4	1	3	3	0	0	0	0	0	0	1	0	0	0	0	0	5	3	4	4	5	4	5	4	2	1	1	2	1	2	1	1	1	1
1085	IT_UI_1085	13	1	13	21	2	5	6	4	1	11	11	0	0	0	0	0	0	1	1	0	0	0	0	4	5	4	2	4	5	5	1	1	1	2	1	1	3	1	1	1	1
1086	IT_UI_1086	13	1	13	19	1	5	7	5	1	3	3	1	0	1	0	1	1	1	1	0	0	1	0	99	5	5	4	5	4	5	4	1	1	3	1	1	1	1	1	1	1
1087	IT_UI_1087	13	1	13	19	2	5	5	5	1	11	11	1	0	1	0	1	1	1	1	0	0	1	0	5	1	5	5	5	5	5	1	3	3	3	1	1	3	2	2	2	1
1088	IT_UI_1088	13	1	13	19	1	5	99	5	1	3	3	1	0	1	0	1	1	1	1	0	0	1	1	5	3	5	4	4	4	5	4	1	1	1	1	1	1	1	1	1	1
1089	IT_UI_1089	13	1	13	19	1	3	6	5	1	3	3	1	0	1	1	1	1	1	1	99	99	1	1	5	5	5	4	5	5	5	4	3	3	3	2	2	3	3	2	3	2
1090	IT_UI_1090	13	1	13	18	1	5	6	4	1	3	3	1	0	1	0	1	1	1	1	0	0	1	0	5	1	5	5	5	2	5	1	2	2	1	1	1	2	1	1	2	1
1091	IT_UI_1091	13	1	13	19	2	2	99	2	3	3	3	1	0	0	0	1	1	1	1	0	0	0	1	4	2	4	3	4	3	4	4	99	99	99	99	99	99	99	99	99	99
1092	IT_UI_1092	13	1	13	18	1	3	99	5	2	11	11	1	0	1	0	1	1	1	1	0	0	1	0	5	5	4	5	4	1	5	2	3	3	4	2	2	2	4	2	2	2
1093	IT_UI_1093	13	1	13	20	1	5	6	4	1	2	2	0	0	1	0	1	1	1	0	0	0	1	0	5	5	5	5	5	4	5	4	3	4	3	3	1	3	2	2	4	3
1094	IT_UI_1094	13	1	13	19	1	4	6	4	3	11	11	0	0	0	0	0	0	0	0	0	0	0	1	1	5	4	4	5	3	4	3	1	1	1	1	1	1	1	1	1	1
1095	IT_UI_1095	13	1	13	19	1	3	6	5	1	3	3	1	0	1	0	99	1	0	0	0	0	99	0	5	4	5	5	5	4	5	5	1	1	1	1	1	1	1	1	1	1
1096	CZ_PR_1096	7	1	14	22	1	5	7	3	2	11	11	0	0	0	0	1	0	1	0	99	99	99	0	99	99	99	99	99	99	99	99	99	99	99	99	99	99	99	99	99	99
1097	CZ_PR_1097	7	1	14	19	2	5	7	5	1	11	11	1	0	1	1	1	0	1	1	0	0	0	1	4	4	4	4	4	4	4	4	2	1	1	2	1	1	1	1	1	1
1098	CZ_PR_1098	7	1	14	19	2	4	6	5	1	11	11	0	1	1	0	1	1	1	0	0	0	1	1	2	3	99	99	99	99	99	99	1	1	1	1	1	1	1	1	1	1
1099	CZ_PR_1099	7	1	14	20	1	5	6	5	1	11	11	1	1	1	0	1	1	1	1	1	1	0	1	5	5	5	4	5	5	5	4	3	3	3	3	2	3	2	3	3	3
1101	CZ_PR_1101	7	1	14	19	2	4	6	4	1	3	3	0	0	1	0	1	1	1	0	0	0	0	0	2	4	5	3	4	4	4	3	5	4	2	5	2	4	2	4	2	4
1102	CZ_PR_1102	7	1	14	19	2	5	6	5	1	11	11	0	0	0	1	99	0	0	0	0	0	1	1	5	5	5	5	4	3	5	5	1	1	1	1	1	1	1	1	1	1
1103	CZ_PR_1103	7	1	14	19	1	4	6	5	1	11	11	1	0	0	0	1	0	1	1	0	0	0	1	5	4	5	3	5	4	5	4	2	2	1	1	1	1	1	1	1	1
1104	CZ_PR_1104	7	1	14	19	1	4	4	5	1	11	11	1	0	0	0	1	0	1	1	0	0	1	1	5	5	5	5	5	5	5	5	2	1	1	1	1	2	2	1	2	1
1105	CZ_PR_1105	7	1	14	19	1	5	6	5	1	11	11	1	0	1	1	1	1	0	0	0	0	0	1	4	3	5	4	3	2	4	4	1	1	1	1	1	1	1	1	1	1
1108	CZ_PR_1108	7	1	14	19	2	5	7	4	1	11	11	1	0	1	0	1	1	1	1	0	0	0	1	4	4	5	5	5	5	4	4	2	2	2	4	4	2	2	1	1	1
1109	CZ_PR_1109	7	1	14	19	2	5	7	5	1	11	11	0	0	0	0	0	0	1	0	0	0	0	1	2	1	4	4	5	4	5	2	1	1	2	1	1	5	2	1	1	1
1111	CZ_PR_1111	7	1	14	19	2	5	7	5	1	11	11	1	1	1	0	1	1	1	1	0	1	99	1	4	5	4	5	4	5	5	5	1	1	1	1	5	1	1	1	1	1
1112	CZ_PR_1112	7	1	14	19	2	5	6	5	1	11	11	0	1	1	0	1	0	1	0	0	1	1	1	5	5	5	5	5	4	5	5	1	1	2	1	1	1	1	1	1	1
1113	CZ_PR_1113	7	1	14	19	2	4	6	4	2	3	3	1	0	1	0	0	0	1	1	0	0	1	1	5	4	4	3	5	4	4	2	2	2	4	5	5	2	4	3	2	4
1114	CZ_PR_1114	7	1	14	20	2	5	7	4	1	11	11	0	0	99	0	99	0	1	1	0	0	1	0	5	5	4	4	5	5	5	3	3	2	2	2	2	2	1	2	1	1
1115	CZ_PR_1115	7	1	14	19	2	4	6	4	1	11	11	1	1	0	0	1	0	1	1	0	0	1	1	4	3	5	3	2	2	4	3	4	4	4	2	1	1	1	1	1	2
1116	CZ_PR_1116	7	1	14	20	1	5	6	4	1	11	11	0	0	0	0	0	0	1	0	0	0	1	0	4	3	4	3	5	3	4	3	1	3	2	1	1	2	3	2	1	1
1118	CZ_PR_1118	7	1	14	19	1	5	6	4	1	11	11	0	1	0	0	1	0	1	0	0	0	0	1	5	4	4	2	5	4	4	4	1	1	1	1	1	5	1	1	1	1
1119	CZ_PR_1119	7	1	14	20	2	4	6	5	1	11	11	0	0	1	0	1	0	0	0	0	0	1	1	5	2	3	2	5	4	5	5	3	4	1	2	1	4	5	2	1	1
1120	CZ_PR_1120	7	1	14	19	2	5	7	5	1	11	11	0	1	1	0	0	0	1	1	0	0	1	1	5	4	4	4	4	4	4	2	1	1	1	1	1	1	1	1	1	1
1121	CZ_PR_1121	7	1	14	19	2	5	6	5	1	3	3	1	0	1	0	1	1	1	1	0	0	0	1	5	4	5	2	4	4	5	1	2	2	2	2	1	1	1	1	1	1
1122	CZ_PR_1122	7	1	14	19	2	5	7	5	2	11	11	0	0	0	0	1	0	0	0	0	0	1	0	4	4	5	4	4	3	5	3	3	3	3	3	4	3	3	3	4	3
1123	CZ_PR_1123	7	1	14	19	2	5	5	4	1	11	11	0	1	0	0	0	0	1	0	1	0	1	1	3	5	4	4	4	2	4	4	2	1	1	2	1	1	1	1	1	1
1124	CZ_PR_1124	7	1	14	21	2	5	4	5	1	11	11	0	0	1	0	1	1	1	0	99	0	0	1	5	1	5	1	5	3	5	1	1	1	1	1	1	1	1	1	1	1
1125	CZ_PR_1125	7	1	14	20	2	5	7	5	1	3	3	0	0	1	0	1	1	1	1	0	0	1	99	4	5	5	5	5	3	5	3	5	4	3	4	4	4	2	3	4	5
1126	CZ_PR_1126	7	1	14	20	2	5	6	5	1	11	11	1	0	1	0	1	1	1	1	0	0	1	0	5	2	5	1	4	3	5	1	4	4	1	3	1	1	1	1	4	1
1127	CZ_PR_1127	7	1	14	19	2	99	99	99	1	10	12	0	0	0	0	99	0	1	1	0	0	1	0	4	5	4	4	5	2	5	5	1	1	1	1	1	1	1	1	1	1
1128	CZ_PR_1128	7	1	14	19	1	5	7	5	1	11	11	99	99	99	99	99	99	99	99	99	99	99	99	99	99	99	99	99	99	99	99	99	99	99	99	99	99	99	99	99	99
1129	CZ_PR_1129	7	1	14	20	2	5	7	5	1	11	11	1	0	1	0	1	1	1	1	0	0	1	99	99	99	99	99	99	99	99	99	99	99	99	99	99	99	99	99	99	99
1130	CZ_PR_1130	7	1	14	19	2	5	7	4	1	3	3	0	0	0	0	1	1	1	0	0	0	0	1	5	4	5	4	4	3	5	4	4	2	2	4	2	1	1	1	1	2
1131	CZ_PR_1131	7	1	14	19	2	5	6	5	2	11	11	1	1	1	1	1	1	1	1	0	0	1	1	5	3	5	3	5	4	5	3	4	3	3	4	3	3	3	3	3	3
1132	CZ_PR_1132	7	1	14	19	2	5	6	5	2	3	3	0	0	99	0	0	0	1	0	0	0	1	0	5	4	5	4	4	2	5	5	4	3	3	2	1	2	2	1	1	2
1133	CZ_PR_1133	7	1	14	19	2	5	5	5	1	11	11	0	0	0	0	1	0	1	1	0	0	1	1	4	3	4	3	4	3	4	3	1	1	1	1	1	1	1	1	1	1
1134	CZ_PR_1134	7	1	14	19	2	5	6	5	1	11	11	1	0	1	0	1	1	1	0	0	0	0	1	5	3	4	4	4	4	5	4	1	2	2	2	2	2	3	2	1	1
1135	CZ_PR_1135	7	1	14	19	2	5	7	5	1	11	11	1	1	1	1	1	1	1	0	0	0	1	1	5	5	4	4	5	5	5	5	1	1	3	1	1	1	1	1	1	1
1136	CZ_PR_1136	7	1	14	19	1	4	6	5	2	11	11	0	0	0	0	0	0	1	1	0	0	0	0	2	3	4	2	5	4	4	3	1	1	4	1	1	1	1	1	1	1
1137	CZ_PR_1137	7	1	15	20	2	5	6	5	1	11	11	1	0	1	0	1	1	1	0	0	0	1	1	5	4	5	4	5	5	5	4	4	4	1	3	1	5	1	1	1	1
1138	CZ_PR_1138	7	1	15	19	2	5	7	5	1	3	3	1	0	1	0	1	1	1	1	0	1	0	1	5	2	5	2	5	4	5	1	5	5	5	5	5	5	5	5	5	5
1139	CZ_PR_1139	7	1	15	21	2	5	7	4	1	11	11	1	0	1	0	1	1	1	1	0	0	1	1	5	4	4	3	4	3	5	3	4	2	3	3	2	3	4	2	2	1
1140	CZ_PR_1140	7	1	15	19	2	5	6	5	1	11	11	1	0	1	0	1	1	1	1	0	0	1	1	5	3	4	3	5	4	3	3	1	1	1	1	1	1	1	1	1	1
1141	CZ_PR_1141	7	1	15	19	2	5	6	1	1	4	4	0	0	0	0	0	0	1	1	0	0	1	0	4	3	4	3	4	5	5	2	4	3	2	3	1	3	2	3	1	1
1142	CZ_PR_1142	7	1	15	19	1	5	6	4	1	11	11	0	0	0	0	99	0	1	1	0	0	1	0	4	4	4	4	4	2	4	3	2	2	1	1	3	4	2	1	2	1
1143	CZ_PR_1143	7	1	15	19	1	5	7	5	1	11	11	0	0	1	0	1	1	1	1	0	0	1	1	5	5	5	4	5	1	5	5	1	1	1	4	2	5	1	1	1	1
1144	CZ_PR_1144	7	1	15	19	2	5	6	5	1	11	11	0	0	1	0	0	1	1	1	0	0	1	1	4	5	5	4	5	99	5	5	1	1	1	1	1	1	1	1	1	1
1145	CZ_PR_1145	7	1	15	19	2	5	6	5	1	10	12	0	0	0	0	1	0	1	0	0	0	1	0	5	5	5	3	5	5	4	3	3	3	2	5	4	3	5	4	3	4
1147	CZ_PR_1147	7	1	15	19	1	5	7	5	1	11	11	0	0	1	0	1	1	1	1	1	0	1	0	5	4	5	4	5	4	5	4	3	2	1	4	2	3	1	1	1	1
1148	CZ_PR_1148	7	1	15	19	2	4	7	5	1	3	3	0	0	0	0	1	0	1	0	0	0	1	0	5	1	4	1	5	5	5	1	5	5	2	5	4	4	5	5	5	5
1149	CZ_PR_1149	7	1	15	19	2	4	5	4	1	11	11	1	0	1	1	1	1	1	1	0	0	0	1	4	2	4	2	4	4	5	4	1	1	2	1	1	1	1	1	1	1
1151	CZ_PR_1151	7	1	15	19	2	5	7	5	1	11	11	0	0	1	1	1	1	1	1	0	0	1	1	4	5	4	5	5	5	5	5	1	1	1	1	1	1	1	1	1	1
1152	CZ_PR_1152	7	1	15	20	2	5	5	5	1	3	3	1	0	1	0	1	1	1	1	0	1	1	1	99	99	99	99	99	99	99	99	5	4	5	5	5	5	3	4	5	4
1153	CZ_PR_1153	7	1	15	19	1	5	6	5	1	11	11	0	0	1	0	0	0	1	0	0	0	0	1	5	5	4	4	5	4	5	4	1	1	1	1	1	1	1	1	1	1
1154	CZ_PR_1154	7	1	15	20	2	5	6	5	1	11	11	0	0	0	0	1	1	1	1	0	0	0	1	2	4	5	2	3	3	3	4	1	1	1	2	1	4	2	1	1	1
1155	CZ_PR_1155	7	1	15	18	1	5	5	5	1	12	12	1	0	1	0	1	1	1	0	0	0	0	1	4	4	5	5	4	4	5	5	2	1	1	1	1	1	1	1	1	1
1157	CZ_PR_1157	7	1	15	19	1	5	6	5	1	9	12	0	0	1	0	1	1	1	0	1	0	1	1	5	5	5	4	5	5	5	4	5	5	3	4	2	1	3	5	1	4
1158	CZ_PR_1158	7	1	15	19	2	4	4	4	1	11	11	0	1	1	0	1	1	1	0	0	0	0	1	2	3	4	3	5	3	5	3	2	2	2	3	3	2	2	1	1	1
1159	CZ_PR_1159	7	1	15	19	2	4	6	5	1	11	11	0	0	1	1	0	0	1	0	0	1	1	1	5	4	4	4	4	3	5	4	1	1	1	1	1	1	1	1	1	1
1160	CZ_PR_1160	7	1	15	19	2	5	6	5	1	11	11	0	0	0	0	1	0	99	99	99	0	1	0	5	4	5	4	5	3	5	2	1	1	1	1	1	1	1	1	1	1
1163	CZ_PR_1163	7	1	15	19	2	5	7	4	1	11	11	0	1	1	0	1	1	1	0	0	0	1	0	4	4	4	4	4	1	4	3	2	1	2	2	1	1	1	2	1	1
1164	CZ_PR_1164	7	1	15	19	2	4	6	4	1	11	11	0	0	1	0	0	0	1	0	0	0	0	0	2	2	4	2	4	4	4	4	1	1	1	1	1	1	1	1	1	1
1165	CZ_PR_1165	7	1	15	19	2	5	7	4	1	12	12	1	1	1	0	1	1	1	1	0	0	1	1	3	1	5	2	3	3	5	2	3	3	3	3	3	3	3	3	3	3
1166	CZ_PR_1166	7	1	15	19	2	5	7	5	1	1	1	0	1	1	0	0	0	1	1	0	0	1	1	3	4	4	4	4	5	5	3	5	5	5	5	5	5	5	5	5	5
1167	CZ_PR_1167	7	1	15	19	2	5	5	4	1	1	1	1	1	0	0	1	0	1	0	0	0	1	1	5	3	4	3	5	3	5	3	2	4	3	2	5	3	4	2	1	2
1168	CZ_PR_1168	7	1	15	19	2	5	6	5	1	11	11	0	0	1	0	1	0	1	0	0	0	1	0	5	2	5	3	5	2	5	2	2	1	1	1	1	2	1	1	1	1
1169	CZ_PR_1169	7	1	15	21	2	5	7	5	1	11	11	0	0	1	1	1	1	1	1	0	0	1	0	99	5	4	4	5	3	5	3	1	1	1	1	1	1	1	1	1	1
1170	CZ_PR_1170	7	1	15	19	2	5	6	5	1	11	11	0	0	1	1	1	1	1	1	0	0	1	0	1	5	4	5	5	3	5	5	4	3	4	2	1	2	4	3	4	1
1171	CZ_PR_1171	7	1	15	19	1	4	5	5	1	11	11	1	0	1	0	1	0	1	0	0	0	1	1	5	5	5	5	5	4	5	5	1	1	1	1	1	1	1	1	1	1
1172	CZ_PR_1172	7	1	15	19	2	5	6	5	1	11	11	1	1	1	1	1	1	1	0	0	0	1	1	5	4	5	4	5	4	5	4	2	2	1	1	1	1	1	1	1	1
1173	CZ_PR_1173	7	1	15	20	2	5	7	5	1	1	1	0	0	0	0	0	0	1	0	0	0	1	1	5	4	5	4	5	4	5	3	5	5	4	5	5	3	4	4	5	5
1174	CZ_PR_1174	7	1	15	20	2	5	6	4	2	11	11	0	0	0	0	1	0	1	1	0	0	0	1	4	4	4	2	4	2	4	4	1	1	1	1	1	1	1	1	1	1
1175	CZ_PR_1175	7	1	15	20	1	5	6	5	1	11	11	0	0	1	0	1	1	1	1	99	0	1	1	5	5	5	99	3	4	5	4	2	2	2	2	1	1	1	2	2	1
1177	CZ_PR_1177	7	1	15	22	2	5	7	5	1	11	11	1	1	1	0	1	1	1	0	0	0	1	1	5	4	4	4	5	4	5	3	4	4	3	4	4	3	4	4	3	3
1178	CZ_PR_1178	7	1	15	19	2	5	6	5	1	11	11	0	0	1	99	1	1	1	1	0	0	1	1	4	4	4	4	4	3	4	3	2	1	3	4	1	2	1	1	1	1
1179	CZ_PR_1179	7	1	15	19	2	5	6	4	1	11	11	0	0	1	0	1	0	1	1	0	0	0	1	5	4	4	3	5	4	4	4	1	1	1	1	1	1	1	1	1	1
1180	CZ_PR_1180	7	1	15	19	2	4	6	4	1	11	11	0	0	1	0	1	1	1	0	0	0	0	0	5	4	4	5	5	5	5	4	1	1	2	2	2	1	1	1	1	1
1181	CZ_PR_1181	7	1	15	19	2	5	6	5	1	11	11	0	0	1	0	1	0	1	1	0	1	99	99	5	5	5	4	5	5	5	4	1	1	1	1	1	1	1	1	1	1
1182	CZ_PR_1182	7	1	15	19	2	5	6	5	1	11	11	0	0	1	1	1	0	1	1	1	0	0	1	5	3	4	2	5	4	5	3	2	2	1	2	2	2	2	1	1	1
1183	CZ_PR_1183	7	1	15	19	2	5	6	5	1	11	11	0	99	99	99	99	99	99	99	99	99	99	99	99	99	99	99	99	99	99	99	99	99	99	99	99	99	99	99	99	99
1185	CZ_PR_1185	7	1	15	21	2	5	6	5	1	11	11	0	0	1	0	1	0	1	0	0	0	1	1	4	3	4	3	4	4	4	3	2	2	1	1	3	1	1	3	1	1
1186	CZ_PR_1186	7	1	15	18	2	5	6	5	1	1	1	1	1	1	1	1	1	1	1	0	0	0	0	3	1	2	1	4	2	2	1	5	5	5	5	5	5	5	5	5	5
1187	CZ_PR_1187	7	1	16	19	1	5	6	5	1	11	11	0	0	1	0	1	0	1	1	0	0	1	1	5	4	5	4	5	4	5	4	1	1	1	1	1	1	1	1	1	1
1189	CZ_PR_1189	7	1	16	19	2	5	6	5	1	11	11	0	0	0	0	0	0	1	1	0	0	0	1	99	99	99	99	99	99	99	99	99	99	99	99	99	99	99	99	99	99
1190	CZ_PR_1190	7	1	16	22	2	5	7	5	1	11	11	1	0	1	0	1	1	1	1	0	0	1	1	3	2	5	3	4	4	5	2	5	5	2	4	2	2	5	5	4	1
1191	CZ_PR_1191	7	1	16	19	1	5	6	4	2	11	11	1	0	1	0	1	1	0	0	0	0	0	1	4	4	4	3	5	4	5	4	1	1	1	1	1	1	4	1	1	1
1192	CZ_PR_1192	7	1	16	19	2	5	7	5	1	3	3	1	0	1	0	1	1	1	1	0	0	0	1	5	2	5	1	5	4	5	1	4	4	3	4	2	2	4	3	4	4
1193	CZ_PR_1193	7	1	16	21	1	5	6	4	1	11	11	0	0	0	0	1	0	1	0	0	0	0	1	5	3	4	3	4	4	5	3	3	3	3	2	3	2	2	2	3	3
1194	CZ_PR_1194	7	1	16	18	2	5	7	5	2	11	11	1	1	1	0	1	1	1	1	0	0	1	0	5	5	5	4	5	3	4	5	1	1	1	1	1	1	1	1	1	1
1195	CZ_PR_1195	7	1	16	19	2	5	6	4	1	11	11	0	1	1	0	0	1	1	0	0	0	0	0	3	5	4	1	4	4	5	2	1	1	1	1	1	2	1	1	1	1
1196	CZ_PR_1196	7	1	16	19	1	5	5	4	1	11	11	0	0	0	0	1	0	1	0	1	0	1	0	5	5	5	4	5	5	5	4	1	1	1	1	1	2	1	1	1	1
1197	CZ_PR_1197	7	1	16	19	2	5	6	4	1	11	11	0	0	1	0	1	0	1	0	0	0	0	1	4	3	3	4	4	3	4	4	2	3	3	2	1	2	2	1	1	1
1198	CZ_PR_1198	7	1	16	19	2	5	7	5	1	11	11	0	0	0	0	0	0	1	1	0	0	0	1	5	1	5	3	5	4	5	1	5	5	5	5	2	4	2	4	1	1
1199	CZ_PR_1199	7	1	16	20	1	5	5	4	1	1	1	1	0	1	0	1	1	1	1	1	0	1	1	5	5	4	5	5	5	5	5	3	2	1	3	1	2	1	1	1	1
1200	CZ_PR_1200	7	1	16	19	2	5	6	5	1	11	11	0	0	0	0	0	0	0	0	0	0	0	1	4	2	4	2	4	4	5	2	2	2	2	2	1	4	2	1	2	1
1201	CZ_PR_1201	7	1	16	20	2	5	7	5	1	11	11	0	1	1	1	1	1	1	1	0	0	1	1	5	5	4	4	5	4	5	5	4	4	1	4	2	1	4	1	1	1
1202	CZ_PR_1202	7	1	16	19	2	5	6	5	1	11	11	0	1	0	1	0	0	1	0	0	0	0	0	3	3	3	3	3	3	3	3	1	1	1	1	1	1	1	1	1	1
1203	CZ_PR_1203	7	1	16	19	2	5	6	4	2	3	3	0	0	0	0	0	0	0	0	99	0	0	99	99	99	99	99	99	99	99	99	99	99	99	99	99	99	99	99	99	99
1204	CZ_PR_1204	7	1	16	19	2	5	5	5	1	11	11	0	0	1	0	1	0	1	1	0	0	0	1	5	4	4	4	4	3	4	4	1	1	1	1	1	1	1	1	1	1
1205	CZ_PR_1205	7	1	16	20	2	5	6	5	1	11	11	1	0	1	1	1	0	1	0	0	1	1	1	4	5	4	5	4	5	5	5	1	1	1	1	1	1	1	1	1	1
1206	CZ_PR_1206	7	1	16	20	1	4	6	5	1	11	11	0	1	0	0	1	0	1	0	0	0	1	1	4	2	3	2	99	2	4	2	3	4	2	1	5	3	1	1	1	1
1208	CZ_PR_1208	7	1	16	20	1	5	99	5	1	11	11	0	1	1	0	1	1	1	1	1	0	0	1	5	5	5	5	4	5	5	5	1	1	1	1	1	1	1	1	1	1
1211	CZ_PR_1211	7	1	16	19	2	5	4	3	2	11	11	0	0	0	0	1	1	1	1	0	0	1	0	5	5	3	3	4	2	2	2	1	1	2	1	1	1	1	1	1	1
1213	CZ_PR_1213	7	1	16	18	2	5	5	5	1	4	4	0	0	1	0	1	0	0	99	0	0	0	0	2	3	5	3	4	2	5	3	1	2	2	3	2	4	5	4	3	3
1214	CZ_PR_1214	7	1	16	20	2	5	5	5	1	11	11	1	0	0	0	0	0	1	1	0	0	1	1	5	5	5	5	5	3	5	5	1	1	1	1	1	1	1	1	1	1
1215	CZ_PR_1215	7	1	16	19	1	5	7	4	1	11	11	1	0	1	0	1	0	1	0	0	0	1	99	99	99	99	99	99	99	99	99	99	99	99	99	99	99	99	99	99	99
1216	CZ_PR_1216	7	1	16	20	1	5	6	5	1	11	11	1	0	1	0	1	1	1	1	1	0	1	1	5	3	4	3	5	3	5	3	3	3	2	3	1	1	2	2	1	1
1217	CZ_PR_1217	7	1	16	20	2	5	5	5	2	3	3	0	0	1	0	1	0	1	1	0	0	1	0	5	3	4	99	99	99	99	99	99	99	99	99	99	99	99	99	99	99
1218	CZ_PR_1218	7	1	16	19	2	5	7	5	1	11	11	0	0	0	1	0	0	1	0	0	0	1	0	4	2	2	2	5	2	4	3	2	2	2	2	2	2	2	2	2	1
1219	CZ_PR_1219	7	1	16	19	2	5	4	5	1	11	11	0	1	1	1	99	0	1	1	1	0	1	0	5	4	5	3	4	5	5	4	1	1	1	1	1	1	1	1	1	1
1221	CZ_PR_1221	7	1	16	20	2	5	5	4	1	11	11	0	0	1	0	1	0	1	1	0	0	1	1	4	2	4	4	3	4	4	2	1	1	1	1	1	1	1	1	1	1
1222	CZ_PR_1222	7	1	16	19	2	5	6	4	3	11	11	0	1	1	0	1	1	1	1	0	0	0	1	99	99	99	99	99	99	99	99	2	2	2	1	1	1	1	1	1	1
1223	CZ_PR_1223	7	1	16	17	2	5	7	5	2	4	4	1	1	0	0	0	0	1	0	0	0	0	0	1	1	4	1	3	1	3	1	1	1	1	1	1	1	1	1	1	1
1224	CZ_PR_1224	7	1	16	21	2	5	6	5	1	11	11	0	0	1	0	1	1	1	1	0	0	1	0	1	2	5	1	5	5	5	1	5	5	4	5	2	5	2	2	4	2
1225	CZ_PR_1225	7	1	16	19	2	5	5	5	1	11	11	1	0	0	0	1	0	1	1	0	0	1	1	5	2	4	3	4	4	5	3	4	4	3	3	2	4	3	3	2	3
1227	CZ_PR_1227	7	1	16	22	1	5	7	5	1	11	11	1	0	1	1	1	1	1	1	0	0	1	0	4	3	4	3	5	2	4	3	4	3	5	5	1	3	1	3	2	4
1228	CZ_PR_1228	7	1	16	19	1	5	7	5	1	11	11	0	0	1	1	0	0	0	0	0	0	0	1	2	3	4	5	1	3	3	5	1	1	1	1	1	5	1	1	1	1
1229	CZ_PR_1229	7	1	16	19	1	5	6	5	1	11	11	0	0	1	0	1	0	1	1	0	0	1	1	4	5	4	4	4	3	4	4	2	2	2	1	1	1	1	1	1	1
1230	CZ_PR_1230	7	1	16	20	2	5	7	5	1	11	11	0	0	1	0	1	0	0	1	0	0	1	1	4	4	5	1	4	4	5	4	1	1	1	1	1	5	1	1	1	5
1232	CZ_PR_1232	7	1	16	20	2	5	6	4	1	11	11	1	0	0	1	0	1	1	0	0	0	0	1	4	3	5	3	4	3	4	2	1	1	1	1	1	1	1	1	1	1
1233	CZ_PR_1233	7	1	16	18	2	5	7	5	2	11	11	0	1	0	0	0	0	1	0	0	0	99	99	99	99	99	99	99	99	99	99	99	99	99	99	99	99	99	99	99	99
1234	CZ_PR_1234	7	1	16	19	2	5	5	4	3	11	11	0	0	1	0	1	0	1	1	0	0	0	1	3	3	4	4	4	4	3	5	1	1	1	1	1	1	1	1	1	1
1235	CZ_PR_1235	7	1	16	21	2	4	7	5	2	11	11	0	1	0	0	1	1	1	0	0	0	0	1	5	5	5	5	5	4	5	5	1	1	1	1	1	1	1	1	1	1
1236	CZ_PR_1236	7	1	16	20	2	5	5	4	1	11	11	0	0	1	0	1	1	0	0	0	0	1	1	4	4	5	4	5	4	5	4	1	1	1	1	1	1	1	1	1	1
1237	CZ_PR_1237	7	1	17	19	2	5	5	5	1	11	11	0	0	0	0	1	0	1	1	0	0	1	0	4	4	5	5	5	1	2	4	2	2	2	1	1	2	2	1	1	1
1238	CZ_PR_1238	7	1	17	19	2	5	6	5	1	11	11	0	0	1	0	1	0	1	0	1	99	99	99	99	99	99	99	99	99	99	99	99	99	99	99	99	99	99	99	99	99
1239	CZ_PR_1239	7	1	17	19	2	5	4	4	1	11	11	0	1	1	0	1	1	1	0	0	0	0	0	5	4	5	4	5	4	5	5	1	1	1	1	1	1	1	1	1	1
1240	CZ_PR_1240	7	1	17	19	2	5	6	5	1	11	11	0	0	1	0	1	1	1	1	99	99	99	99	99	99	99	99	99	99	99	99	99	99	99	99	99	99	99	99	99	99
1241	CZ_PR_1241	7	1	17	19	2	5	7	5	1	11	11	0	0	0	1	0	0	1	0	0	1	0	99	99	99	99	99	99	99	99	99	99	99	99	99	99	99	99	99	99	99
1242	CZ_PR_1242	7	1	17	19	2	5	5	4	1	11	11	0	0	0	0	0	0	1	0	0	1	1	1	4	3	4	3	4	3	3	3	1	1	2	1	1	2	1	1	1	1
1243	CZ_PR_1243	7	1	17	19	2	5	6	4	2	11	11	0	0	1	0	1	0	1	0	0	0	0	1	4	3	5	3	5	5	4	2	1	2	2	1	1	3	1	1	1	1
1244	CZ_PR_1244	7	1	17	19	2	5	6	5	1	11	11	1	0	1	0	1	1	1	0	0	0	0	0	5	5	5	5	4	2	5	5	1	1	4	1	1	1	1	1	1	1
1245	CZ_PR_1245	7	1	17	19	2	4	6	5	1	11	11	0	0	0	0	0	0	1	0	0	0	1	1	5	5	5	5	4	4	5	5	2	4	2	1	1	1	4	1	1	1
1246	CZ_PR_1246	7	1	17	19	2	5	7	4	1	11	11	1	0	1	1	1	1	1	1	0	0	1	0	4	3	5	4	5	3	5	4	2	3	2	1	2	3	1	1	1	1
1247	CZ_PR_1247	7	1	17	19	2	4	6	5	2	11	11	0	0	1	0	1	1	1	0	0	0	1	1	5	4	5	4	5	1	5	4	1	1	2	1	1	1	1	1	1	1
1248	CZ_PR_1248	7	1	17	18	1	5	5	4	1	11	11	0	0	1	0	1	1	1	1	99	0	1	0	2	4	4	4	4	4	4	4	3	5	2	3	2	3	2	2	1	1
1251	CZ_PR_1251	7	1	17	20	2	5	6	5	1	11	11	0	0	0	0	0	0	1	1	0	0	0	1	4	4	4	3	4	3	4	3	1	1	1	1	1	1	1	1	1	1
1252	CZ_PR_1252	7	1	17	19	2	5	6	5	1	11	11	0	0	1	0	0	0	0	0	0	0	1	0	5	5	5	4	5	5	5	1	1	1	1	4	2	1	1	1	1	1
1253	CZ_PR_1253	7	1	17	19	2	4	7	5	1	3	3	0	0	1	0	0	0	1	0	0	0	0	0	2	4	4	4	2	4	5	3	3	3	4	3	2	3	2	1	1	1
1254	CZ_PR_1254	7	1	17	20	1	5	5	5	1	3	3	1	0	1	0	1	0	0	0	0	0	0	1	4	2	3	2	3	4	2	1	5	4	4	5	5	5	4	4	4	5
1256	CZ_PR_1256	7	1	17	19	2	5	6	5	1	11	11	0	0	0	0	0	0	1	1	1	0	0	1	5	3	5	4	5	2	5	2	1	1	1	1	1	1	1	1	1	1
1257	CZ_PR_1257	7	1	17	19	1	5	4	4	1	11	11	1	1	1	0	1	1	1	1	0	0	1	0	5	5	5	5	5	2	5	5	2	1	1	1	1	1	1	1	1	1
1259	CZ_PR_1259	7	1	17	19	2	5	6	5	1	3	3	1	1	1	0	1	0	1	1	0	0	0	0	4	3	4	3	2	3	4	3	99	99	99	99	99	99	99	99	99	99
1260	CZ_PR_1260	7	1	17	20	2	5	6	5	1	11	11	0	0	0	0	0	0	1	0	0	0	0	1	5	1	5	4	5	2	5	1	5	5	5	5	5	5	5	5	5	5
1261	CZ_PR_1261	7	1	17	20	2	5	5	5	1	11	11	0	0	0	0	1	0	1	0	1	0	0	0	5	5	4	3	5	3	5	3	3	3	3	3	3	3	3	3	3	3
1263	CZ_PR_1263	7	1	17	20	2	5	6	4	1	12	12	0	0	1	1	1	0	1	0	0	0	1	0	5	2	5	2	5	2	4	2	2	2	5	4	3	3	2	2	5	5
1264	CZ_PR_1264	7	1	17	19	2	5	6	5	1	11	11	99	0	0	0	1	0	1	0	0	0	1	0	3	3	4	3	4	2	4	3	1	1	1	1	1	1	1	1	1	1
1265	CZ_PR_1265	7	1	17	20	1	5	6	5	1	11	11	0	1	1	0	1	1	1	1	0	0	0	0	4	5	4	5	4	3	5	5	1	2	1	1	1	1	1	1	1	1
1266	CZ_PR_1266	7	1	17	19	1	5	7	5	1	11	11	1	0	1	0	1	1	1	1	0	0	1	1	5	4	5	2	4	4	5	2	1	2	2	2	2	3	1	1	4	1
1267	CZ_PR_1267	7	1	17	19	2	5	6	4	1	11	11	0	0	0	0	1	1	1	1	0	0	0	0	5	4	4	1	4	3	4	3	1	1	1	1	1	1	1	1	1	1
1268	CZ_PR_1268	7	1	17	19	2	5	4	4	2	3	3	0	0	1	0	1	1	1	0	0	0	1	99	5	1	4	1	5	3	5	3	5	5	1	2	3	5	4	3	5	3
1270	CZ_PR_1270	7	1	17	19	1	5	7	5	1	11	11	0	0	0	0	0	0	1	1	0	0	1	1	2	4	4	4	5	4	4	4	1	1	2	1	1	1	1	1	1	1
1271	CZ_PR_1271	7	1	17	20	2	5	6	5	1	11	11	0	0	1	0	1	1	1	1	0	0	1	0	4	4	5	4	4	3	5	5	1	1	1	4	1	1	1	1	1	1
1272	CZ_PR_1272	7	1	17	19	2	5	6	5	1	11	11	0	0	0	0	0	0	1	1	0	1	1	0	5	5	5	5	5	5	5	5	1	1	1	1	1	1	1	1	1	1
1273	CZ_PR_1273	7	1	17	19	2	4	5	5	1	11	11	0	0	1	0	1	0	1	0	0	0	0	0	4	3	4	3	3	4	4	3	3	3	2	4	4	2	5	2	2	2
1274	CZ_PR_1274	7	1	17	19	2	5	7	5	1	11	11	0	0	1	0	1	0	1	0	0	0	0	0	2	2	5	1	5	4	4	2	2	1	1	1	1	4	2	1	1	1
1275	CZ_PR_1275	7	1	17	20	2	5	5	5	1	11	11	0	0	0	1	0	0	1	0	0	0	0	1	3	99	99	99	99	99	99	99	1	1	1	1	1	1	1	1	1	1
1277	CZ_PR_1277	7	1	17	20	1	5	7	1	1	11	11	0	1	1	1	1	1	1	1	0	0	0	1	5	2	5	2	4	3	5	1	2	3	2	1	1	1	1	1	1	1
1278	CZ_PR_1278	7	1	17	19	2	4	7	5	1	11	11	1	0	1	0	1	1	1	1	0	0	0	1	5	3	4	3	5	3	5	4	3	3	2	2	2	2	2	2	2	1
1279	CZ_PR_1279	7	1	17	19	1	5	5	5	1	99	99	0	0	0	0	0	0	1	99	0	0	99	99	99	99	99	99	99	99	99	99	99	99	99	99	99	99	99	99	99	99
1280	CZ_PR_1280	7	1	17	20	2	4	6	4	1	11	11	0	0	1	1	1	0	1	1	0	0	1	0	4	3	4	3	5	2	5	3	3	3	4	2	2	3	1	1	1	1
1281	CZ_PR_1281	7	1	17	19	2	5	4	5	1	11	11	0	0	1	0	1	0	1	1	0	0	0	0	3	4	4	4	3	3	4	3	2	3	3	2	2	3	3	2	1	1
1282	CZ_PR_1282	7	1	17	19	2	5	7	5	2	11	11	0	0	1	0	0	0	1	1	0	0	1	1	5	3	5	2	5	4	5	3	2	1	1	1	1	2	1	1	1	1
1283	CZ_PR_1283	7	1	17	19	2	5	4	4	1	11	11	0	0	0	0	0	0	0	0	0	1	1	1	5	4	4	1	4	4	5	4	1	2	1	1	1	2	1	1	1	1
1284	CZ_PR_1284	7	1	17	20	2	5	6	5	1	11	11	0	0	0	0	0	0	1	1	0	0	0	1	5	3	5	4	4	4	5	3	1	1	1	1	1	1	1	1	1	1
1285	CZ_PR_1285	7	1	17	19	2	5	6	5	1	11	11	0	1	1	0	0	1	1	0	0	0	0	0	4	4	5	3	4	3	5	2	2	1	2	2	1	2	1	1	1	1
1286	CZ_PR_1286	7	1	17	19	2	5	7	5	1	11	11	0	0	1	0	1	1	1	1	0	0	1	1	5	5	5	4	5	5	5	5	1	1	1	1	1	1	1	1	1	1
1288	CZ_PR_1288	7	1	18	19	2	5	6	4	1	11	11	0	0	1	0	1	0	1	0	0	0	1	0	4	4	4	2	3	2	5	1	1	1	1	1	1	1	1	1	1	1
1289	CZ_PR_1289	7	1	18	19	2	5	4	4	1	11	11	0	0	0	0	0	1	1	0	0	0	1	0	4	5	3	3	4	4	5	5	1	1	1	1	1	1	1	1	1	1
1290	CZ_PR_1290	7	1	18	21	2	5	4	3	1	11	11	1	0	1	0	0	0	1	1	0	0	1	0	2	1	5	5	5	1	5	1	1	1	1	1	1	1	1	1	1	1
1291	CZ_PR_1291	7	1	18	19	2	5	7	5	1	3	3	0	0	1	0	1	1	1	1	0	0	1	0	5	2	5	3	5	4	5	2	5	5	5	5	5	5	5	5	5	5
1292	CZ_PR_1292	7	1	18	19	1	5	6	5	2	11	11	1	0	1	0	1	1	1	1	0	0	1	1	1	4	5	5	5	5	99	5	1	1	1	1	1	1	1	1	1	1
1293	CZ_PR_1293	7	1	18	21	2	5	4	5	1	11	11	0	0	1	0	1	0	1	0	1	0	1	0	4	3	4	4	3	3	4	3	2	2	2	2	2	2	2	2	2	2
1294	CZ_PR_1294	7	1	18	19	2	5	5	5	1	11	11	0	0	1	1	0	99	99	99	99	99	99	99	99	99	99	99	99	99	99	99	99	99	99	99	99	99	99	99	99	99
1295	CZ_PR_1295	7	1	18	19	2	5	5	5	1	11	11	0	0	1	0	99	0	1	99	99	99	99	99	99	99	99	99	99	99	99	99	99	99	99	99	99	99	99	99	99	99
1296	CZ_PR_1296	7	1	18	20	2	5	4	5	1	11	11	1	0	1	0	1	0	1	0	0	0	0	0	2	4	5	5	5	4	5	5	1	1	1	1	1	1	1	1	1	1
1298	CZ_PR_1298	7	1	18	19	2	5	7	5	1	11	11	1	0	1	0	1	1	1	0	0	0	0	1	5	4	5	4	5	3	5	4	4	4	3	4	3	2	4	2	1	2
1299	CZ_PR_1299	7	1	18	20	2	5	5	4	1	11	11	0	0	1	0	1	0	1	0	0	0	0	1	5	3	4	3	3	3	5	3	2	3	2	2	2	4	1	1	1	1
1300	CZ_PR_1300	7	1	18	19	2	5	5	4	1	11	11	0	0	1	0	0	0	1	1	0	0	0	0	4	4	4	4	4	3	4	3	2	3	1	2	1	1	2	1	1	1
1302	CZ_PR_1302	7	1	18	20	2	5	6	5	1	11	11	0	0	0	0	1	1	1	0	0	0	0	0	5	4	4	4	4	2	4	4	1	1	1	1	1	1	1	1	1	1
1303	CZ_PR_1303	7	1	18	19	2	5	6	5	1	11	11	0	0	1	0	1	1	1	1	1	0	0	1	3	4	5	5	5	5	5	5	1	1	1	1	1	1	2	1	1	1
1304	CZ_PR_1304	7	1	18	19	2	5	7	5	1	11	11	1	0	1	0	1	1	1	1	0	1	0	1	4	4	4	4	4	4	4	4	3	2	2	2	2	3	3	3	2	3
1305	CZ_PR_1305	7	1	18	20	2	5	6	4	1	11	11	0	0	0	0	0	0	1	0	0	0	0	0	5	3	4	4	4	3	4	4	2	2	2	2	2	2	2	2	2	2
1306	CZ_PR_1306	7	1	18	19	2	5	7	5	1	11	11	0	0	1	0	1	1	1	0	0	0	1	1	4	3	5	3	4	3	5	5	1	1	1	1	1	1	1	1	1	1
1307	CZ_PR_1307	7	1	18	20	2	5	6	5	1	3	3	0	1	1	0	0	0	1	0	0	0	1	1	4	5	4	3	4	4	4	3	4	4	3	3	2	4	2	3	3	3
1308	CZ_PR_1308	7	1	18	19	1	5	6	5	1	11	11	0	0	1	0	1	1	1	0	0	0	0	1	4	3	4	3	4	3	4	3	1	2	2	4	4	2	1	1	2	1
1309	CZ_PR_1309	7	1	18	20	2	5	7	5	1	11	11	1	1	1	0	1	0	1	0	0	0	0	1	4	5	5	4	4	5	5	4	99	99	99	99	99	99	99	99	99	99
1310	CZ_PR_1310	7	1	18	19	1	5	6	5	1	1	1	0	1	1	0	1	1	1	1	1	0	1	0	5	4	5	99	5	5	5	3	5	4	4	4	5	5	3	5	5	5
1311	CZ_PR_1311	7	1	18	18	2	4	5	5	2	1	1	1	0	1	0	1	1	1	1	0	1	1	0	1	1	2	1	1	1	1	1	5	5	4	5	5	5	5	5	5	4
1312	CZ_PR_1312	7	1	18	19	2	5	7	5	1	11	11	0	1	1	0	1	1	1	0	1	0	1	1	5	4	5	4	5	5	5	3	1	1	2	3	2	1	1	1	1	1
1313	CZ_PR_1313	7	1	18	19	2	5	5	4	2	12	12	0	1	0	0	1	1	1	0	0	0	0	0	5	5	4	5	5	3	5	5	1	1	1	1	1	1	1	1	1	1
1314	CZ_PR_1314	7	1	18	19	2	5	7	5	1	11	11	0	0	1	0	1	1	1	1	0	0	0	1	3	4	5	4	5	4	5	4	1	1	1	5	2	1	2	1	1	1
1315	CZ_PR_1315	7	1	18	20	2	4	6	4	2	11	11	0	0	0	0	0	0	1	1	0	0	0	1	5	99	5	99	5	99	5	99	1	1	1	5	5	5	1	1	1	1
1316	CZ_PR_1316	7	1	18	19	2	5	6	5	1	11	11	0	1	0	1	1	0	1	0	0	0	0	0	5	4	4	4	5	3	2	4	1	1	1	1	2	2	2	1	1	1
1317	CZ_PR_1317	7	1	18	21	2	5	6	5	1	11	11	0	1	1	1	1	1	1	1	0	0	1	1	1	4	5	4	4	3	4	4	3	2	3	2	2	3	2	3	2	2
1318	CZ_PR_1318	7	1	18	19	2	5	4	4	1	11	11	1	0	1	0	1	1	1	1	0	0	0	1	5	4	4	4	5	4	5	4	2	2	1	2	1	3	3	1	2	1
1319	CZ_PR_1319	7	1	18	19	2	5	6	5	1	11	11	0	0	1	0	1	1	1	1	0	0	1	1	4	2	5	2	2	4	2	1	1	1	1	2	1	4	2	1	2	1
1320	CZ_PR_1320	7	1	18	19	2	5	6	5	1	11	11	0	0	0	0	1	1	1	0	1	0	0	1	2	5	5	4	5	4	4	4	2	2	2	1	3	3	3	3	3	3
1322	CZ_PR_1322	7	1	18	19	2	5	6	4	1	11	11	0	0	0	0	1	0	1	1	0	0	1	1	5	4	5	4	5	4	5	4	1	1	1	1	1	2	1	1	1	1
1323	CZ_PR_1323	7	1	18	19	2	4	6	5	1	11	11	1	0	1	0	1	1	1	1	1	1	1	1	5	3	5	2	2	3	4	4	1	1	1	1	1	1	1	1	1	1
1325	CZ_PR_1325	7	1	18	19	2	5	6	5	1	11	11	0	0	1	0	0	1	1	0	0	0	0	1	2	2	4	4	4	4	4	4	3	3	3	2	2	4	2	3	3	3
1326	CZ_PR_1326	7	1	18	19	2	5	6	4	1	11	11	0	1	1	0	1	1	1	0	0	1	1	1	5	3	4	3	4	3	5	3	2	3	2	2	2	4	2	1	1	1
1327	CZ_PR_1327	7	1	18	20	1	5	6	4	1	11	11	1	0	1	1	1	1	1	1	0	0	1	0	5	5	5	5	5	4	5	5	1	1	1	1	1	1	1	1	1	1
1328	CZ_PR_1328	7	1	18	20	1	4	6	5	1	11	11	0	0	0	0	0	0	1	1	1	0	0	0	4	2	4	2	4	3	5	2	1	1	1	1	1	1	4	1	4	1
1329	CZ_PR_1329	7	1	18	19	2	4	6	5	1	11	11	0	0	1	0	1	0	1	0	0	0	1	1	4	4	4	4	3	4	4	3	1	1	1	1	2	1	2	1	1	1
1330	CZ_PR_1330	7	1	18	19	2	5	6	5	1	11	11	0	0	1	0	1	0	1	1	0	0	0	1	4	5	5	5	5	4	5	5	1	1	1	1	1	1	1	1	1	1
1331	CZ_PR_1331	7	1	18	19	2	5	5	4	1	11	11	0	0	1	0	0	0	1	0	0	0	0	1	4	2	4	2	4	3	4	2	4	4	2	3	2	4	4	3	3	3
1332	CZ_PR_1332	7	1	18	19	2	5	6	5	1	11	11	1	0	1	1	1	1	1	0	0	0	1	1	3	4	5	4	5	5	4	5	1	1	1	1	1	1	1	1	1	1
1333	CZ_PR_1333	7	1	18	19	2	4	6	4	1	11	11	1	0	1	0	1	1	1	1	0	0	1	0	4	4	4	5	4	4	3	4	2	2	2	2	1	3	1	1	1	1
1335	CZ_PR_1335	7	1	18	20	2	5	6	5	1	11	11	0	0	1	0	1	0	1	1	0	0	1	0	2	99	5	2	5	2	2	2	1	1	1	2	1	1	1	1	3	1
1336	CZ_PR_1336	7	1	18	19	2	5	5	4	1	11	11	0	0	0	0	1	0	0	0	0	0	1	1	99	99	99	99	99	99	99	99	5	3	2	4	1	2	5	1	2	3
1338	CZ_PI_1338	7	1	19	20	2	3	1	4	3	11	11	1	0	0	0	0	0	1	0	0	0	0	0	4	2	4	5	5	3	4	3	1	1	1	1	1	2	1	1	1	1
1339	CZ_PI_1339	7	1	19	19	2	5	4	5	1	3	3	0	1	0	1	0	0	1	0	0	0	1	0	4	4	4	4	4	4	4	4	5	5	4	5	3	5	4	3	5	4
1340	CZ_PI_1340	7	1	19	19	2	4	2	5	1	11	11	0	0	0	1	0	0	1	0	0	0	0	1	2	2	4	4	4	3	5	2	1	1	1	1	1	1	1	1	1	1
1341	CZ_PI_1341	7	1	19	19	2	4	4	4	1	11	11	1	0	1	0	0	0	1	0	0	0	1	1	2	3	4	3	4	3	4	2	2	2	2	3	4	3	5	1	1	2
1342	CZ_PI_1342	7	1	19	19	2	5	4	5	1	11	11	1	0	0	0	0	0	1	0	0	0	0	1	4	4	4	3	4	3	3	3	4	5	4	4	3	5	2	3	4	4
1343	CZ_PI_1343	7	1	19	20	2	1	4	2	1	11	11	0	0	0	0	0	0	1	1	0	0	0	0	4	3	3	2	3	4	3	2	3	3	4	4	4	4	5	3	4	3
1344	CZ_PI_1344	7	1	19	22	2	3	4	4	1	11	11	1	0	0	0	0	0	0	0	0	0	1	1	5	4	4	4	5	5	5	4	2	2	2	4	4	4	4	1	3	1
1345	CZ_PI_1345	7	1	19	19	2	2	3	3	1	11	11	0	0	0	0	0	0	1	1	0	0	0	1	5	4	5	4	5	5	5	4	1	2	2	1	1	2	1	1	1	1
1347	CZ_PI_1347	7	1	19	19	2	5	5	5	1	11	11	0	0	0	0	1	1	1	0	0	0	0	1	5	4	5	2	5	2	5	4	1	1	1	1	1	1	1	1	1	1
1348	CZ_PI_1348	7	1	19	19	2	4	4	4	1	11	11	0	0	0	0	1	0	1	1	0	0	0	0	5	4	5	5	4	4	5	3	1	1	1	1	1	1	1	1	1	1
1349	CZ_PI_1349	7	1	19	21	2	5	6	5	1	11	11	0	0	0	0	1	0	0	0	0	0	0	0	4	2	4	2	3	2	4	2	3	3	4	2	4	3	1	3	2	3
1350	CZ_PI_1350	7	1	19	19	2	4	99	5	1	11	11	0	0	0	0	0	0	1	0	0	0	0	1	5	1	5	1	2	4	5	1	1	1	1	1	1	1	1	1	1	1
1351	CZ_PI_1351	7	1	19	19	2	4	3	5	1	11	11	1	0	0	0	0	0	1	0	0	0	1	0	4	4	5	1	5	4	5	1	4	4	3	2	1	3	4	3	1	3
1352	CZ_PI_1352	7	1	19	19	2	4	4	5	1	11	11	0	0	0	1	0	0	1	1	0	0	0	0	4	2	5	2	4	4	3	2	1	1	1	1	1	3	1	1	1	1
1353	CZ_PI_1353	7	1	19	22	2	4	6	5	1	11	11	0	0	0	1	1	0	1	0	0	0	1	0	5	4	5	4	5	4	4	4	1	1	1	1	1	1	1	1	1	1
1354	CZ_PI_1354	7	1	19	19	2	5	3	5	1	11	11	1	0	0	0	1	0	1	0	0	0	1	0	5	4	3	2	4	3	5	2	1	1	2	1	1	5	1	1	2	1
1355	CZ_PI_1355	7	1	19	19	2	4	4	4	3	11	11	0	0	0	0	0	0	1	1	0	0	0	1	4	3	3	2	3	4	3	3	1	1	1	1	1	4	1	1	3	1
1356	CZ_PI_1356	7	1	19	19	1	5	3	4	1	12	12	0	1	1	1	1	0	1	1	0	0	0	1	5	4	4	4	5	4	5	4	4	4	2	4	1	1	1	4	1	1
1357	CZ_PI_1357	7	1	19	19	2	2	4	5	1	3	3	0	1	0	0	0	0	0	0	0	0	0	1	2	3	4	4	3	4	4	4	4	4	4	3	3	5	4	3	3	3
1358	CZ_PI_1358	7	1	19	20	1	5	6	5	1	12	12	0	0	0	0	1	0	1	0	0	0	1	0	4	3	3	2	5	5	5	3	5	5	5	4	3	4	5	4	3	5
1359	CZ_PI_1359	7	1	19	19	2	5	4	4	1	12	12	0	1	0	1	1	0	1	0	0	0	1	0	5	2	4	2	2	4	4	2	4	4	3	4	3	4	2	2	1	4
1360	CZ_PI_1360	7	1	19	20	2	5	4	4	1	11	11	0	0	0	0	1	0	1	1	0	0	0	0	2	4	3	4	4	4	4	4	2	2	1	2	2	3	4	1	1	1
1361	CZ_PI_1361	7	1	19	22	2	5	5	5	1	11	11	0	0	0	1	0	0	1	0	0	0	0	1	5	4	5	4	1	2	5	4	1	1	1	1	1	1	1	1	1	1
1362	CZ_PI_1362	7	1	19	19	2	5	5	5	1	11	11	1	0	0	0	1	1	1	0	0	0	1	1	4	4	4	4	5	4	4	4	1	1	1	1	1	1	1	1	1	1
1363	CZ_PI_1363	7	1	19	19	2	3	3	4	1	11	11	0	0	0	1	0	0	1	0	0	0	1	0	4	3	4	2	4	3	4	3	4	4	3	2	2	3	2	4	4	2
1364	CZ_PI_1364	7	1	19	20	2	5	4	5	1	11	11	1	0	1	0	1	1	1	1	0	0	1	1	5	3	4	2	5	3	4	3	3	4	4	2	1	5	1	1	1	1
1365	CZ_PI_1365	7	1	19	19	2	5	7	5	1	11	11	0	0	0	0	1	1	1	1	0	0	1	1	5	3	5	5	5	3	5	1	2	4	4	1	3	5	5	3	3	3
1366	CZ_PI_1366	7	1	19	19	2	4	2	3	3	3	3	0	0	0	0	0	0	1	0	0	0	0	1	5	4	3	2	3	4	2	3	1	1	1	1	1	1	1	1	1	1
1367	CZ_PI_1367	7	1	19	20	2	5	4	4	1	11	11	0	0	1	0	0	0	1	1	0	0	0	0	5	4	4	4	4	2	5	1	1	5	2	1	1	2	1	1	1	1
1368	CZ_PI_1368	7	1	19	20	2	5	4	5	1	11	11	0	0	0	0	0	0	1	0	0	0	1	0	4	2	4	2	4	3	4	3	2	1	1	2	1	3	2	2	4	1
1369	CZ_PI_1369	7	1	19	20	2	5	6	5	1	11	11	1	1	1	0	1	0	1	0	0	0	1	0	4	3	4	4	4	2	4	3	1	5	2	4	2	3	4	1	1	1
1371	CZ_PI_1371	7	1	19	19	2	2	2	2	2	11	11	1	0	0	1	0	0	1	1	0	0	1	1	5	3	4	2	5	3	4	2	1	1	1	1	1	2	1	1	1	1
1372	CZ_PI_1372	7	1	19	20	2	4	2	3	3	11	11	0	0	0	0	0	0	1	1	0	0	1	1	5	3	4	4	4	4	4	4	1	1	2	1	1	2	1	1	1	1
1373	CZ_PI_1373	7	1	19	19	2	4	4	5	1	11	11	0	0	0	0	0	0	1	0	0	0	0	0	5	5	5	4	3	5	5	4	2	4	4	1	1	5	1	1	1	1
1374	CZ_PI_1374	7	1	19	20	2	4	5	4	1	11	11	0	0	0	0	0	0	1	0	0	0	1	0	5	4	4	1	5	5	5	2	4	4	3	2	4	5	4	1	3	3
1375	CZ_PI_1375	7	1	19	20	2	4	1	4	1	11	11	0	0	1	0	0	0	1	0	0	0	0	1	4	3	2	2	5	3	5	3	1	1	1	1	1	1	1	1	1	1
1376	CZ_PI_1376	7	1	19	19	2	2	4	5	3	3	3	0	0	0	0	0	0	1	0	0	0	0	0	5	5	5	3	3	4	5	3	5	5	5	5	4	5	5	5	5	5
1377	CZ_PI_1377	7	1	19	19	2	4	4	4	1	12	12	0	0	0	0	0	0	1	0	0	0	1	0	4	4	4	4	3	4	4	2	4	3	5	4	4	2	2	3	2	2
1378	CZ_PI_1378	7	1	19	19	2	4	6	5	1	11	11	0	0	0	0	1	0	1	0	0	0	0	0	4	5	4	2	5	2	5	3	1	1	2	1	1	1	1	1	1	1
1379	CZ_PI_1379	7	1	19	19	2	4	6	5	1	11	11	0	1	0	0	0	0	1	1	0	0	1	1	5	2	4	4	4	2	4	2	1	1	1	1	1	1	1	1	1	1
1380	CZ_PI_1380	7	1	19	19	2	4	4	5	1	11	11	0	0	0	0	1	0	1	1	0	0	0	1	4	3	2	2	4	4	4	3	1	1	1	1	1	1	1	1	1	1
1381	CZ_PI_1381	7	1	19	19	2	4	4	4	2	11	11	0	0	1	0	1	1	1	0	0	0	0	0	5	4	4	2	2	99	4	2	1	1	1	2	1	2	1	1	1	1
1382	CZ_PI_1382	7	1	19	19	2	5	4	4	1	11	11	0	0	0	0	0	0	1	0	0	0	1	0	2	4	4	2	5	2	4	2	4	4	3	2	4	2	3	2	2	3
1383	CZ_PI_1383	7	1	19	20	2	3	99	4	1	3	3	0	0	0	0	0	0	1	1	0	0	1	1	4	4	4	2	4	4	4	2	5	4	4	5	3	4	4	4	4	4
1384	CZ_PI_1384	7	1	19	19	2	5	99	5	1	11	11	0	0	0	1	1	0	1	0	0	0	1	1	4	4	5	4	4	3	5	2	2	2	99	4	3	3	4	1	2	1
1385	CZ_PI_1385	7	1	19	19	2	5	5	5	1	3	3	0	1	1	0	0	0	1	1	0	1	1	0	5	4	5	5	5	3	5	4	5	5	5	5	3	5	5	5	5	5
1386	CZ_PI_1386	7	1	19	22	2	5	5	5	1	11	11	0	0	0	0	0	0	1	0	0	0	1	0	5	2	4	2	3	3	5	2	2	2	1	2	1	4	2	1	1	1
1387	CZ_PI_1387	7	1	20	20	2	5	6	5	1	11	11	1	0	1	0	1	1	1	0	0	0	0	1	4	4	4	4	4	4	5	4	1	1	1	1	1	1	1	1	1	1
1389	CZ_PI_1389	7	1	20	20	1	5	4	5	1	11	11	0	1	1	0	0	0	1	1	0	0	1	0	5	5	5	3	5	5	5	3	4	4	4	2	2	5	2	2	3	3
1390	CZ_PI_1390	7	1	20	20	2	3	4	5	1	11	11	0	1	1	0	0	0	1	1	0	0	1	0	5	5	5	3	5	5	5	3	3	2	1	1	1	2	1	1	2	1
1391	CZ_PI_1391	7	1	20	22	1	5	1	3	1	11	11	0	0	0	0	0	0	1	1	0	0	0	1	5	5	5	5	5	4	5	5	1	1	1	1	1	1	1	1	1	1
1392	CZ_PI_1392	7	1	20	20	2	5	7	5	1	3	3	0	1	1	0	0	0	1	0	0	1	1	1	4	3	4	3	4	2	4	2	4	4	4	3	3	4	4	3	3	3
1393	CZ_PI_1393	7	1	20	20	2	5	5	5	1	11	11	0	0	0	0	0	0	1	1	0	0	0	1	4	2	4	4	4	4	4	5	4	4	2	2	5	4	2	1	1	1
1394	CZ_PI_1394	7	1	20	21	2	5	5	4	1	11	11	0	0	0	0	1	1	1	1	0	0	99	0	5	5	4	4	4	1	4	5	1	1	1	2	2	2	1	1	1	1
1395	CZ_PI_1395	7	1	20	21	1	5	6	5	1	11	11	1	1	1	0	1	1	1	0	0	0	0	1	5	5	5	5	2	5	5	4	1	1	1	2	1	1	1	1	1	1
1396	CZ_PI_1396	7	1	20	19	2	5	4	5	1	11	11	0	0	1	1	0	0	1	1	0	0	1	1	4	4	4	4	4	3	4	4	1	2	3	2	4	3	1	1	2	1
1397	CZ_PI_1397	7	1	20	19	2	5	4	4	1	11	11	0	0	0	1	0	0	1	1	0	0	0	0	2	3	4	4	3	2	4	5	1	2	2	1	1	1	3	1	1	1
1398	CZ_PI_1398	7	1	20	19	2	5	4	4	1	11	11	1	0	1	0	0	0	0	0	0	0	1	1	4	4	5	4	1	4	5	1	4	4	3	2	2	4	1	1	2	1
1399	CZ_PI_1399	7	1	20	19	1	5	5	5	1	11	11	0	0	0	0	0	0	1	0	0	0	99	0	2	4	5	5	1	4	4	4	1	1	1	1	1	1	1	1	1	1
1400	CZ_PI_1400	7	1	20	21	2	4	6	4	1	11	11	0	0	1	1	1	0	1	1	0	0	1	0	5	2	5	1	5	5	5	1	2	3	2	4	3	2	1	1	5	1
1401	CZ_PI_1401	7	1	20	20	2	5	6	1	1	11	11	0	0	0	0	1	0	1	0	0	0	0	1	2	2	4	2	5	2	5	2	99	3	2	1	4	2	4	3	1	99
1402	CZ_PI_1402	7	1	20	19	2	5	6	4	1	5	12	0	0	0	0	1	0	1	0	0	0	0	1	5	4	4	4	4	1	4	4	5	4	5	4	5	1	2	2	1	3
1403	CZ_PI_1403	7	1	20	19	2	5	6	4	1	3	3	0	0	0	1	0	0	1	1	0	0	1	1	3	4	4	4	4	2	4	4	4	4	4	4	3	4	4	3	2	2
1404	CZ_PI_1404	7	1	20	21	2	5	5	5	1	11	11	0	0	1	0	1	1	1	1	0	0	0	1	4	2	4	2	5	3	3	2	2	2	2	1	1	2	2	1	1	1
1405	CZ_PI_1405	7	1	20	20	2	4	4	5	1	1	1	0	0	0	0	0	1	1	1	0	0	0	1	5	5	5	5	5	5	5	5	4	4	2	5	4	1	4	4	4	2
1406	CZ_PI_1406	7	1	20	20	2	5	4	5	1	11	11	1	0	1	0	0	1	1	0	0	0	1	0	4	3	5	3	3	4	5	3	1	4	3	1	2	1	2	1	1	1
1407	CZ_PI_1407	7	1	20	21	1	5	6	5	2	11	11	0	0	0	0	0	0	1	0	0	0	0	1	5	5	5	5	5	5	5	5	1	1	1	1	1	1	1	1	1	1
1408	CZ_PI_1408	7	1	20	20	2	5	5	5	2	4	4	0	0	0	0	0	0	1	0	0	0	0	1	5	2	2	2	5	1	5	3	5	4	3	5	3	5	4	3	3	3
1409	CZ_PI_1409	7	1	20	19	2	5	4	4	1	11	11	0	0	0	0	0	0	1	0	0	0	0	1	3	3	4	2	2	3	99	2	1	1	2	1	99	4	2	1	2	1
1410	CZ_PI_1410	7	1	20	19	2	5	4	5	1	11	11	0	0	0	0	1	0	1	0	0	0	0	1	5	4	5	3	4	4	4	5	1	3	1	1	1	4	1	1	1	1
1412	CZ_PI_1412	7	1	20	21	2	5	6	5	1	11	11	0	1	1	0	0	0	1	0	0	0	0	1	4	3	4	2	3	3	5	1	1	1	1	1	1	1	1	1	1	1
1413	CZ_PI_1413	7	1	20	19	1	5	5	5	1	11	11	0	0	0	0	1	1	0	0	0	0	99	1	5	4	4	4	4	3	4	3	1	2	2	1	1	2	2	1	1	1
1414	CZ_PI_1414	7	1	20	20	1	5	4	4	1	11	11	0	0	1	0	1	1	1	1	0	0	0	0	4	3	4	3	4	3	4	4	1	1	1	1	1	1	1	1	1	1
1415	CZ_PI_1415	7	1	20	20	2	5	4	4	1	11	11	0	0	0	1	0	0	1	0	0	0	0	1	5	2	5	1	4	1	4	3	2	2	5	1	1	5	1	1	1	1
1416	CZ_PI_1416	7	1	20	21	2	4	4	5	1	11	11	0	0	0	0	1	0	1	1	0	0	1	0	5	5	5	3	4	5	5	4	1	2	2	2	1	3	1	1	1	1
1417	CZ_PI_1417	7	1	20	19	1	5	6	4	1	11	11	1	0	0	1	0	0	1	0	99	0	0	0	99	99	99	99	99	99	99	99	99	99	99	99	99	99	99	99	99	99
1418	CZ_PI_1418	7	1	20	19	2	4	6	2	3	11	11	0	0	0	0	0	0	1	0	0	0	1	0	1	2	4	4	4	4	5	4	1	1	1	1	1	4	1	1	1	1
1419	CZ_PI_1419	7	1	20	20	1	4	4	5	1	3	3	0	0	1	0	1	1	1	1	0	0	1	0	5	2	4	4	3	5	5	4	5	5	3	4	5	3	4	1	2	2
1420	CZ_PI_1420	7	1	20	19	2	5	4	4	1	11	11	1	0	1	0	0	0	1	0	0	0	1	0	2	4	4	4	4	4	2	3	1	1	1	1	1	2	1	1	1	1
1421	CZ_PI_1421	7	1	20	21	2	5	4	4	2	11	11	0	0	0	1	0	0	1	1	0	0	0	1	3	1	5	5	3	5	3	1	5	3	3	1	1	1	1	1	1	1
1422	CZ_PI_1422	7	1	20	19	2	4	3	3	1	3	3	0	0	0	0	0	0	1	1	0	0	0	1	5	3	4	4	5	3	4	5	5	4	4	5	3	5	5	3	4	5
1423	CZ_PI_1423	7	1	20	19	1	5	5	5	1	11	11	0	0	0	0	0	0	1	1	0	0	1	0	2	3	4	4	4	2	4	3	2	3	2	5	4	3	5	3	3	3
1424	CZ_PI_1424	7	1	20	19	1	5	5	4	1	11	11	0	0	0	0	0	0	1	0	0	1	1	0	5	5	4	3	5	5	5	4	2	1	3	1	1	3	1	1	3	3
1425	CZ_PI_1425	7	1	20	19	2	5	4	3	1	11	11	1	0	1	0	0	0	0	0	0	0	1	1	1	2	4	1	3	3	4	2	1	1	2	3	1	3	1	1	1	1
1426	CZ_PI_1426	7	1	20	19	2	5	6	5	1	3	3	0	0	1	0	1	0	1	1	0	0	1	1	4	1	5	1	5	5	5	1	5	5	5	5	5	5	5	5	2	5
1427	CZ_PI_1427	7	1	20	21	2	4	4	4	1	11	11	0	0	0	0	0	0	1	1	0	0	1	0	5	4	3	1	4	4	3	3	1	1	1	1	2	2	1	1	1	1
1428	CZ_PI_1428	7	1	20	20	2	5	4	4	1	11	11	0	0	0	0	0	0	1	1	0	0	1	1	4	4	4	3	4	3	5	2	1	1	1	1	1	1	1	1	1	1
1431	CZ_PI_1431	7	1	20	19	2	4	3	5	3	11	11	1	0	1	0	1	0	1	1	0	0	1	1	4	5	3	4	4	4	5	3	2	2	1	1	1	2	1	1	1	1
1432	CZ_PI_1432	7	1	20	19	2	4	2	4	1	11	11	1	0	1	0	1	0	1	1	0	0	1	1	5	3	5	2	5	3	5	3	1	2	1	1	1	1	1	1	1	1
1433	CZ_PI_1433	7	1	20	20	2	4	2	4	1	11	11	0	1	0	0	0	1	0	0	0	0	0	0	4	3	5	1	3	4	3	2	2	2	4	1	1	4	4	1	1	1
1434	CZ_PI_1434	7	1	20	19	2	4	2	5	1	11	11	0	0	0	0	0	0	1	0	0	0	1	1	4	4	4	5	4	4	4	5	2	2	1	2	1	3	2	1	1	1
1435	CZ_PI_1435	7	1	20	21	2	4	4	4	3	10	12	1	0	0	0	0	0	1	1	0	0	1	0	5	5	5	4	4	4	5	4	1	2	1	3	1	3	3	1	1	1
1436	CZ_OL_1436	7	1	21	19	2	5	7	5	1	3	3	0	0	0	0	0	0	1	1	0	0	1	1	5	2	5	2	5	4	5	4	4	3	4	4	2	3	4	5	2	4
1437	CZ_OL_1437	7	1	21	20	2	4	5	5	1	11	11	0	0	0	0	0	0	1	0	0	0	0	1	5	5	5	4	5	4	5	4	1	2	2	1	1	1	1	1	1	1
1438	CZ_OL_1438	7	1	21	21	2	2	2	3	3	11	11	0	0	0	0	0	0	1	1	0	0	1	0	4	4	4	3	4	2	4	3	1	1	1	1	1	2	1	1	1	1
1440	CZ_OL_1440	7	1	21	20	2	5	6	4	1	11	11	0	0	0	0	0	0	1	0	0	0	0	1	5	1	4	4	2	4	5	2	3	3	2	3	4	4	4	2	4	2
1441	CZ_OL_1441	7	1	21	19	2	5	6	4	1	11	11	0	0	1	0	0	0	0	0	1	0	0	1	5	5	4	3	2	2	4	3	1	1	2	1	1	4	1	1	1	1
1442	CZ_OL_1442	7	1	21	19	2	5	4	5	1	3	3	0	0	0	1	0	1	1	1	0	0	0	0	3	3	5	3	4	3	4	3	5	5	3	5	4	5	5	4	5	4
1443	CZ_OL_1443	7	1	21	21	2	5	6	4	1	11	11	1	1	1	0	0	0	1	0	0	0	0	1	5	4	5	5	5	4	5	1	2	4	2	2	5	5	5	2	5	2
1444	CZ_OL_1444	7	1	21	19	2	4	5	4	2	11	11	1	0	0	0	0	1	1	1	0	0	0	1	5	3	4	3	4	2	5	4	2	2	2	2	2	4	2	1	1	1
1445	CZ_OL_1445	7	1	21	20	1	5	6	5	1	3	3	1	1	1	0	1	1	1	1	0	0	1	0	1	5	5	4	2	5	2	4	5	4	4	4	3	2	4	3	4	4
1446	CZ_OL_1446	7	1	21	19	2	5	6	4	1	3	3	1	0	0	0	0	0	1	0	0	1	0	0	4	2	4	2	4	1	5	3	5	5	5	4	4	5	5	5	4	5
1447	CZ_OL_1447	7	1	21	19	2	4	4	4	1	11	11	0	0	0	0	0	0	1	1	0	0	0	0	5	4	4	4	3	4	5	4	4	3	2	2	1	4	4	2	4	2
1448	CZ_OL_1448	7	1	21	20	2	5	5	4	3	11	11	1	0	1	0	0	1	1	1	0	0	1	0	4	3	4	2	5	2	5	3	2	2	3	2	1	4	1	1	2	2
1449	CZ_OL_1449	7	1	21	22	1	5	4	5	1	11	11	0	0	0	1	0	0	1	1	0	0	1	1	5	4	4	1	3	2	4	1	4	5	5	5	4	3	2	4	4	3
1450	CZ_OL_1450	7	1	21	19	2	5	4	4	1	11	11	0	0	0	0	0	0	1	0	0	0	0	0	4	2	4	3	5	4	5	4	4	4	4	3	2	5	2	2	3	1
1451	CZ_OL_1451	7	1	21	19	2	5	4	5	1	11	11	0	0	0	0	1	0	0	0	0	0	1	1	2	2	4	2	4	2	2	2	2	2	2	1	1	4	1	1	2	1
1452	CZ_OL_1452	7	1	21	19	1	4	5	5	1	11	11	0	0	0	1	0	0	1	1	0	0	0	0	5	4	4	5	5	3	5	3	1	1	1	1	1	2	2	1	1	2
1453	CZ_OL_1453	7	1	21	22	1	2	4	4	3	11	11	0	1	1	0	1	1	0	0	0	0	0	0	5	5	4	3	4	3	5	1	1	2	3	1	1	5	2	1	1	1
1454	CZ_OL_1454	7	1	21	19	2	2	2	2	2	3	3	1	1	0	0	1	0	1	0	0	0	1	1	5	4	4	3	4	1	5	4	5	5	4	5	4	5	5	4	4	4
1456	CZ_OL_1456	7	1	21	20	2	3	6	5	1	11	11	0	0	0	0	1	0	1	1	0	0	1	1	5	3	4	3	5	4	5	3	4	3	4	3	2	2	3	3	4	1
1457	CZ_OL_1457	7	1	21	19	2	4	3	3	1	3	3	0	0	0	0	0	0	0	0	0	0	0	1	5	4	4	2	3	3	4	5	5	5	4	4	4	4	5	4	3	5
1458	CZ_OL_1458	7	1	21	20	2	5	6	5	1	11	11	1	0	0	0	1	0	1	0	0	0	0	1	1	3	4	1	5	4	4	1	1	1	1	1	1	1	1	1	1	1
1459	CZ_OL_1459	7	1	21	19	2	4	6	4	2	11	11	0	0	0	0	0	0	1	0	0	0	1	0	3	1	4	2	1	1	5	1	1	1	1	2	1	5	1	1	1	1
1460	CZ_OL_1460	7	1	21	20	1	5	6	5	1	11	11	0	0	1	0	0	0	1	0	0	0	1	0	2	5	5	5	5	5	5	5	1	4	1	1	1	1	1	1	1	1
1461	CZ_OL_1461	7	1	21	21	2	5	6	5	1	1	1	0	0	0	0	0	1	1	1	0	0	1	0	2	1	1	1	2	2	1	1	5	5	5	4	5	5	5	5	5	5
1462	CZ_OL_1462	7	1	21	20	2	4	5	4	1	11	11	0	0	1	0	1	0	0	0	0	0	0	0	5	3	5	3	4	4	4	3	3	3	2	2	3	3	2	2	1	1
1463	CZ_OL_1463	7	1	21	19	2	5	5	5	1	3	3	0	0	1	0	1	0	1	0	0	1	0	0	3	3	4	4	3	4	4	3	3	3	3	3	3	3	2	3	3	3
1464	CZ_OL_1464	7	1	21	21	2	5	4	5	1	3	3	0	0	1	0	0	0	1	0	0	0	0	0	5	3	5	3	5	3	5	3	1	2	2	1	1	1	1	1	1	1
1465	CZ_OL_1465	7	1	21	19	2	5	5	5	1	11	11	0	0	1	0	1	1	1	0	0	0	0	1	5	2	3	2	4	3	3	3	1	1	1	2	1	4	1	1	1	1
1466	CZ_OL_1466	7	1	21	20	2	5	5	5	1	11	11	0	0	1	0	1	1	1	0	0	0	0	1	5	3	3	3	4	3	3	3	1	2	1	3	4	2	1	1	1	1
1467	CZ_OL_1467	7	1	21	23	1	4	4	3	3	11	11	1	0	0	0	0	1	1	1	99	0	0	0	4	1	4	3	4	4	4	3	4	5	4	5	3	3	1	3	3	3
1468	CZ_OL_1468	7	1	21	20	2	5	4	4	1	11	11	0	0	0	0	0	0	1	1	0	0	1	0	5	5	5	5	4	4	5	4	2	2	2	2	1	3	1	1	1	1
1469	CZ_OL_1469	7	1	21	19	2	5	5	4	1	3	3	0	0	1	0	99	0	1	0	0	0	1	1	4	4	4	3	4	3	4	4	3	2	2	3	2	4	2	2	2	2
1470	CZ_US_1470	7	1	22	19	2	5	4	5	1	11	11	0	1	0	0	0	0	1	0	0	0	0	0	2	5	4	2	5	99	5	1	2	1	1	2	1	1	1	1	1	1
1471	CZ_US_1471	7	1	22	19	2	5	5	4	2	11	11	0	0	0	0	0	0	1	0	0	0	0	0	5	3	4	3	3	4	4	3	1	1	1	1	1	4	4	1	1	1
1472	CZ_US_1472	7	1	22	19	2	4	3	3	1	11	11	0	1	0	0	0	0	1	1	0	0	1	0	2	5	4	4	4	2	2	4	1	1	1	1	3	1	1	1	1	1
1473	CZ_US_1473	7	1	22	21	2	5	4	4	1	11	11	0	0	1	0	1	0	1	1	0	0	1	0	2	3	4	4	4	5	5	2	1	1	1	2	1	2	1	1	1	1
1474	CZ_US_1474	7	1	22	20	2	5	4	4	1	11	11	0	0	0	1	0	0	1	1	0	0	0	1	5	4	5	2	5	4	4	3	2	2	2	1	1	5	1	1	1	1
1475	CZ_US_1475	7	1	22	19	2	5	5	4	1	11	11	0	0	0	1	0	0	1	0	0	0	1	0	5	3	5	4	4	4	5	3	1	1	3	1	1	4	4	1	1	1
1476	CZ_US_1476	7	1	22	19	2	4	3	5	1	11	11	0	0	0	1	0	0	1	1	0	0	0	0	4	4	5	2	4	2	5	2	1	3	1	1	1	4	1	1	1	1
1477	CZ_US_1477	7	1	22	19	2	5	4	5	1	1	1	0	0	0	0	0	0	1	0	0	0	0	0	1	1	1	1	1	1	1	1	5	5	5	5	5	5	5	5	5	5
1478	CZ_US_1478	7	1	22	20	1	5	2	5	1	11	11	0	1	0	0	0	0	0	0	0	0	1	1	5	5	5	5	5	5	5	5	4	2	2	2	1	5	1	1	5	1
1479	CZ_US_1479	7	1	22	19	2	4	4	4	1	11	11	1	0	0	0	0	1	1	1	0	0	1	1	5	4	4	1	4	3	4	1	2	2	4	4	4	4	4	1	1	1
1480	CZ_US_1480	7	1	22	20	2	5	4	5	1	11	11	1	0	0	0	0	0	1	1	0	0	0	0	5	4	5	3	4	3	4	3	1	2	1	1	1	5	4	1	1	1
1481	CZ_US_1481	7	1	22	19	2	5	2	5	1	11	11	0	0	1	0	1	0	0	0	0	0	0	1	5	5	4	5	3	4	4	5	1	1	1	1	1	5	1	1	1	1
1482	CZ_US_1482	7	1	22	19	2	2	4	4	1	11	11	0	0	0	0	0	0	1	1	0	0	0	0	4	4	4	2	3	4	4	4	3	3	4	1	1	2	3	1	1	1
1483	CZ_US_1483	7	1	22	19	2	5	4	5	1	11	11	0	0	0	1	1	1	1	0	0	0	0	1	5	3	4	4	4	4	4	1	2	1	1	2	1	3	1	1	1	1
1484	CZ_US_1484	7	1	22	19	1	5	3	4	1	11	11	0	0	0	99	1	0	1	0	0	0	1	1	2	1	3	1	4	4	4	1	1	2	1	4	2	2	1	1	1	1
1485	CZ_US_1485	7	1	22	20	2	5	4	4	1	11	11	1	0	1	0	0	1	1	1	0	0	0	0	5	4	3	3	4	3	4	1	1	1	2	1	99	4	1	1	1	1
1486	CZ_US_1486	7	1	22	19	2	4	4	5	1	11	11	0	0	0	0	0	0	0	0	1	0	0	0	5	5	5	3	5	5	5	2	1	1	4	4	2	4	1	1	1	1
1487	CZ_US_1487	7	1	22	21	2	4	6	5	1	11	11	1	0	0	1	1	1	1	1	0	0	1	1	4	3	4	3	2	3	2	2	5	5	5	5	4	5	5	4	4	4
1488	CZ_US_1488	7	1	22	19	2	4	4	4	1	11	11	0	0	0	0	0	0	1	0	0	1	0	0	99	2	4	5	5	3	2	2	1	4	4	2	1	5	2	1	2	1
1489	CZ_US_1489	7	1	22	19	2	4	4	4	1	11	11	0	0	0	0	0	0	1	1	0	0	0	1	5	2	4	3	5	4	3	1	2	4	4	1	2	2	1	1	2	1
1490	CZ_US_1490	7	1	22	19	2	5	6	5	1	11	11	0	0	0	0	0	0	1	0	0	0	1	0	3	3	3	3	4	3	3	3	1	1	1	1	1	1	1	1	1	1
1491	CZ_US_1491	7	1	22	19	2	5	4	5	1	11	11	0	0	1	1	0	0	1	1	0	0	1	1	5	2	4	1	2	5	5	1	1	4	4	1	1	5	5	1	1	1
1493	CZ_US_1493	7	1	22	19	2	5	4	5	1	11	11	0	0	0	1	0	0	1	0	0	0	1	0	5	3	4	4	4	3	4	3	1	2	3	1	1	3	1	1	1	1
1494	CZ_US_1494	7	1	22	19	2	5	4	4	1	11	11	0	0	0	0	0	0	1	1	0	0	1	1	4	5	3	2	4	5	3	2	3	3	3	3	2	3	1	1	2	1
1495	CZ_US_1495	7	1	22	20	2	5	4	5	1	3	3	0	0	0	0	0	1	1	0	0	1	0	1	5	5	5	3	3	5	5	4	5	5	3	5	3	3	5	3	5	3
1496	CZ_US_1496	7	1	22	19	2	5	2	4	1	11	11	0	0	1	0	0	0	1	1	0	0	1	0	4	3	4	3	5	4	4	3	2	3	3	2	1	3	2	1	1	1
1497	CZ_US_1497	7	1	22	19	2	5	5	4	2	11	11	0	0	0	0	0	0	1	1	0	0	0	1	4	4	4	3	4	2	5	3	1	1	1	1	1	3	1	1	1	1
1498	CZ_US_1498	7	1	22	19	2	5	2	4	2	11	11	0	0	0	0	0	0	1	1	0	0	0	0	4	3	4	2	4	2	4	2	1	1	1	1	1	3	1	1	1	1
1499	CZ_US_1499	7	1	22	19	2	4	6	5	2	99	99	1	0	0	1	1	0	1	1	0	0	0	0	2	4	4	4	4	5	4	2	2	4	4	2	2	4	99	99	2	1
1500	CZ_US_1500	7	1	22	20	2	4	4	4	1	11	11	1	0	0	0	0	0	1	1	0	0	0	0	5	5	5	5	2	3	4	5	1	1	1	1	1	1	1	1	1	1
1501	CZ_US_1501	7	1	22	19	2	5	5	4	1	11	11	0	1	0	0	0	0	1	1	0	0	1	0	5	3	3	4	3	3	3	3	5	4	5	4	3	5	4	4	3	3
1502	CZ_US_1502	7	1	22	19	2	5	4	4	1	11	11	0	0	1	0	0	0	1	0	99	99	1	0	1	1	5	4	3	1	1	3	4	4	4	3	3	3	5	1	3	1
1503	CZ_US_1503	7	1	22	19	2	1	4	4	2	11	11	0	0	1	0	0	0	1	0	0	0	1	99	99	99	99	99	99	99	99	99	1	3	2	1	1	3	1	1	1	1
1504	CZ_US_1504	7	1	22	20	2	5	3	4	1	11	11	0	0	0	1	0	0	1	1	0	0	0	0	5	5	5	2	3	5	5	3	1	1	3	1	1	5	1	1	1	1
1505	CZ_US_1505	7	1	22	19	2	5	4	4	1	11	11	0	0	0	1	0	0	0	0	0	0	0	0	4	5	4	3	4	3	4	3	2	1	3	2	1	4	4	1	1	1
1506	CZ_US_1506	7	1	22	19	2	4	4	4	1	11	11	0	0	0	0	1	0	1	0	0	0	1	0	5	4	4	5	4	4	5	4	4	3	4	2	2	3	2	3	3	3
1507	CZ_US_1507	7	1	22	19	2	4	4	3	1	11	11	0	1	0	1	0	0	0	0	1	0	1	0	5	5	5	2	3	3	5	3	1	1	1	1	1	1	1	1	1	1
1508	CZ_US_1508	7	1	22	20	2	5	4	4	1	10	12	0	0	0	0	0	0	1	0	0	1	0	0	5	3	4	3	5	5	4	3	4	5	3	4	4	3	4	2	2	2
1509	CZ_US_1509	7	1	22	19	2	4	4	4	1	11	11	0	0	0	0	0	0	1	1	0	0	1	0	5	5	5	5	5	5	5	5	1	1	1	2	2	4	3	1	2	1
1510	CZ_US_1510	7	1	22	19	2	5	99	4	3	11	11	0	0	0	0	0	0	0	0	0	0	1	0	4	3	4	3	3	3	3	4	2	4	3	3	3	3	3	3	3	3
1511	CZ_US_1511	7	1	22	20	2	5	5	4	1	11	11	1	0	0	0	0	0	1	0	1	0	1	0	4	2	3	4	3	4	4	2	4	3	4	4	3	3	5	3	3	2
1512	CZ_US_1512	7	1	22	19	2	2	4	4	3	11	11	1	0	0	0	0	0	1	1	0	0	1	1	4	3	4	4	3	4	4	4	2	4	2	2	1	4	4	1	1	3
1513	CZ_US_1513	7	1	22	19	2	5	1	3	1	11	11	0	0	0	1	1	0	1	0	0	0	1	1	4	4	3	1	2	4	3	2	1	1	1	1	1	1	1	1	1	1
1514	CZ_US_1514	7	1	22	21	2	5	4	4	1	11	11	0	0	0	0	0	0	1	1	0	0	1	0	4	2	4	3	3	4	3	2	3	3	2	4	3	3	5	2	3	3
1515	CZ_US_1515	7	1	22	19	2	5	4	5	1	11	11	0	0	0	0	0	0	1	1	0	0	1	1	4	3	3	3	4	4	4	3	1	1	2	1	1	4	2	1	3	2
1516	CZ_US_1516	7	1	22	20	2	5	4	4	1	11	11	0	1	0	0	0	0	0	1	0	0	1	0	5	5	4	3	5	4	3	4	1	1	1	1	5	1	1	1	1	1
1517	CZ_US_1517	7	1	22	20	2	5	4	4	1	11	11	0	1	0	0	0	1	1	1	0	0	0	0	5	2	4	2	3	4	4	4	2	2	2	2	1	5	5	2	2	2
1518	CZ_US_1518	7	1	22	20	2	5	4	4	1	11	11	0	0	0	0	0	0	1	0	0	0	0	0	4	3	4	5	3	4	5	5	1	1	1	1	1	1	1	1	1	1
1519	CZ_US_1519	7	1	22	19	2	5	4	5	1	11	11	0	0	0	0	0	0	0	0	0	0	0	0	4	3	2	2	4	4	3	3	1	1	1	1	1	1	1	1	1	1
1520	CZ_US_1520	7	1	23	21	2	5	2	4	3	11	11	0	0	0	1	0	0	1	0	0	0	0	0	4	3	4	1	4	3	5	1	1	4	1	3	1	5	3	1	1	1
1521	CZ_US_1521	7	1	23	19	2	5	4	4	1	11	11	1	1	0	0	0	0	1	1	0	0	0	1	5	4	4	4	4	4	4	4	2	2	2	2	1	5	3	1	1	1
1522	CZ_US_1522	7	1	23	20	2	5	3	4	1	11	11	0	0	0	0	0	0	1	1	0	0	1	0	4	4	3	3	3	3	3	3	2	2	1	1	1	3	1	1	1	1
1523	CZ_US_1523	7	1	23	19	2	3	4	4	1	11	11	0	0	0	0	0	0	1	1	0	0	1	0	5	4	4	4	4	4	4	4	4	4	4	4	1	1	1	1	1	1
1524	CZ_US_1524	7	1	23	21	2	2	4	4	2	11	11	0	0	0	0	0	0	1	1	0	0	0	0	5	3	4	4	4	3	2	3	1	1	2	1	1	4	1	1	1	1
1525	CZ_US_1525	7	1	23	20	2	5	5	5	1	11	11	0	0	0	0	0	0	1	1	0	0	1	0	5	3	5	3	3	4	5	3	1	1	1	1	1	2	2	1	1	1
1526	CZ_US_1526	7	1	23	20	2	5	5	5	1	11	11	0	1	0	0	1	0	1	0	0	0	0	1	5	2	4	2	4	4	5	2	1	2	2	1	1	4	5	2	1	1
1527	CZ_US_1527	7	1	23	19	2	5	2	3	1	99	99	0	0	0	0	0	1	1	0	0	0	0	0	4	4	2	4	2	4	2	2	2	2	2	1	2	3	2	1	1	1
1528	CZ_US_1528	7	1	23	19	2	5	3	4	1	11	11	0	0	0	0	0	1	1	0	0	1	0	1	4	4	2	3	99	2	3	2	1	1	2	1	1	1	1	1	1	1
1529	CZ_US_1529	7	1	23	19	2	5	5	5	1	11	11	0	1	0	0	0	0	1	1	1	0	0	1	5	5	5	5	4	5	5	5	2	2	2	1	1	5	3	1	1	1
1530	CZ_US_1530	7	1	23	19	2	5	4	5	1	11	11	0	1	0	0	0	0	1	1	0	0	0	1	4	5	5	4	3	4	3	4	2	2	1	1	1	4	4	1	2	1
1531	CZ_US_1531	7	1	23	20	2	4	4	4	1	11	11	0	1	0	1	0	0	1	1	0	0	1	0	4	2	4	2	4	3	5	3	1	2	3	5	3	5	3	1	2	3
1532	CZ_US_1532	7	1	23	19	2	5	4	4	1	11	11	0	0	0	0	0	0	1	1	0	0	0	0	5	5	5	99	3	4	5	5	1	1	2	5	4	1	4	2	5	1
1533	CZ_US_1533	7	1	23	19	2	5	5	5	1	4	4	0	0	1	0	1	0	1	0	0	0	0	0	4	2	5	3	5	5	5	4	5	4	5	5	2	4	2	2	4	1
1534	CZ_US_1534	7	1	23	20	2	5	7	1	1	12	12	99	99	99	1	99	99	1	0	0	0	1	1	5	1	5	1	5	2	5	1	99	99	99	99	99	99	99	99	99	99
1535	CZ_US_1535	7	1	23	20	2	5	1	4	1	11	11	0	0	0	0	0	0	1	0	0	0	0	0	4	4	5	2	5	4	5	2	1	4	3	2	2	4	3	2	2	2
1536	CZ_US_1536	7	1	23	19	2	5	4	4	1	11	11	0	1	0	0	0	0	0	0	0	0	1	0	5	5	4	2	4	4	2	4	1	1	2	1	1	2	2	1	1	1
1537	CZ_US_1537	7	1	23	19	2	3	4	2	2	11	11	0	1	0	0	1	0	1	1	0	0	1	0	4	4	3	3	3	4	3	4	1	1	1	1	1	2	2	1	1	1
1538	CZ_US_1538	7	1	23	19	2	5	3	4	1	11	11	0	0	0	0	0	0	1	1	0	0	1	0	4	2	99	2	4	2	4	2	1	2	4	1	1	1	1	1	1	1
1539	IT_PA_1539	13	1	24	19	1	3	7	4	1	11	11	0	0	0	0	1	1	0	0	0	0	0	0	99	99	99	99	99	99	99	99	99	99	99	99	99	99	99	99	99	99
1542	IT_PA_1542	13	1	24	20	2	1	5	3	1	3	3	0	0	0	0	1	0	0	0	0	0	0	0	4	3	4	4	3	4	4	3	4	5	5	4	3	5	4	3	4	3
1543	IT_PA_1543	13	1	24	20	2	5	6	3	1	3	3	1	0	1	0	1	1	1	1	0	0	0	1	4	5	4	4	4	4	4	4	3	3	3	2	2	2	1	1	2	1
1544	IT_PA_1544	13	1	24	18	1	5	6	4	2	13	12	1	0	0	0	0	0	1	0	0	0	0	0	4	5	4	3	5	5	5	2	99	99	99	99	99	99	99	99	99	99
1546	IT_PA_1546	13	1	24	19	1	3	7	5	1	3	3	1	1	1	0	1	1	1	1	0	0	0	0	4	5	5	5	5	4	5	5	1	1	1	1	1	1	1	1	1	1
1547	IT_PA_1547	13	1	24	19	2	4	7	4	1	13	12	1	0	1	0	1	1	1	1	0	0	0	1	5	4	4	5	5	5	5	4	5	5	4	2	1	1	1	99	1	2
1548	IT_PA_1548	13	1	24	19	2	1	5	4	1	6	5	0	0	1	0	0	0	1	0	0	0	0	0	4	2	5	2	4	2	4	2	99	99	99	99	99	99	99	99	99	99
1549	IT_PA_1549	13	1	24	18	2	3	6	4	1	3	3	1	0	1	0	1	0	1	0	1	1	0	1	2	2	4	3	5	3	5	2	3	3	1	3	1	3	1	1	3	1
1550	IT_PA_1550	13	1	24	19	1	3	5	4	1	3	3	1	0	0	0	1	0	1	1	1	1	0	0	2	3	4	4	5	5	5	4	1	1	1	1	1	1	1	1	1	1
1551	IT_PA_1551	13	1	24	19	2	5	6	4	1	11	11	1	0	1	0	1	0	1	1	0	0	0	1	5	4	3	5	5	4	5	5	1	1	1	1	1	1	1	1	1	1
1552	IT_PA_1552	13	1	24	19	2	4	5	3	1	11	11	1	0	0	0	0	0	1	1	0	0	0	0	5	4	4	2	5	3	5	5	99	99	99	99	99	99	99	99	99	99
1553	IT_PA_1553	13	1	24	19	2	5	7	3	1	11	11	1	0	1	0	1	1	1	1	0	0	1	1	5	5	5	4	5	4	5	5	1	1	4	1	1	1	1	1	1	1
1554	IT_PA_1554	13	1	24	19	2	4	6	4	3	3	3	0	0	0	0	0	0	0	0	1	0	1	0	5	5	4	5	5	5	5	5	4	5	4	2	3	2	2	1	1	1
1555	IT_PA_1555	13	1	24	19	2	4	5	3	1	3	3	1	0	0	0	0	0	1	1	0	0	1	0	5	3	4	4	5	3	5	3	4	3	3	4	1	3	1	1	3	1
1556	IT_PA_1556	13	1	24	18	2	5	6	5	1	3	3	1	0	1	0	1	0	1	1	0	0	0	1	4	3	5	5	4	4	5	2	4	4	4	4	4	4	3	3	5	3
1557	IT_PA_1557	13	1	24	19	2	4	6	4	1	3	3	0	0	0	0	0	0	1	1	0	0	0	0	5	4	5	5	5	5	5	5	4	4	4	3	3	5	4	4	5	4
1558	IT_PA_1558	13	1	24	19	2	5	7	4	1	3	3	1	0	0	0	1	1	0	0	0	0	1	1	4	5	3	5	4	4	4	5	5	4	4	4	2	4	4	3	3	3
1559	IT_PA_1559	13	1	24	19	2	3	6	5	2	4	4	0	0	1	0	1	1	1	1	0	0	1	1	4	5	5	4	4	5	5	5	4	2	4	4	2	2	1	2	1	1
1560	IT_PA_1560	13	1	24	19	2	3	6	4	1	3	3	0	0	0	0	1	0	1	0	0	0	1	0	4	4	5	4	5	3	5	5	5	4	4	4	2	4	4	4	4	4
1561	IT_PA_1561	13	1	24	20	2	4	5	5	1	3	3	0	0	1	0	1	0	1	0	0	0	0	0	4	1	4	5	5	1	4	4	5	5	3	4	3	1	2	4	3	2
1562	IT_PA_1562	13	1	24	19	2	1	5	3	1	3	3	0	0	1	0	1	0	1	0	0	0	1	1	5	4	5	4	5	4	5	5	4	4	3	4	2	5	4	3	5	1
1563	IT_PA_1563	13	1	24	18	2	1	5	3	1	3	3	0	0	1	0	1	1	1	0	0	0	1	0	5	2	4	4	5	2	5	2	3	4	2	2	2	1	2	2	1	2
1564	IT_PA_1564	13	1	24	20	2	5	6	5	1	3	3	1	0	1	0	1	1	1	0	0	0	0	0	5	4	4	5	5	2	5	4	5	5	5	5	5	5	4	4	5	5
1565	IT_PA_1565	13	1	24	19	1	3	5	4	1	3	3	0	0	0	0	0	0	1	0	0	0	0	0	5	4	5	5	5	5	5	5	4	4	2	2	2	3	3	2	3	2
1566	IT_PA_1566	13	1	24	23	2	3	7	3	2	2	2	0	0	0	0	1	0	1	0	1	0	1	0	5	5	5	5	4	5	5	5	5	4	4	4	3	3	2	2	4	2
1567	IT_PA_1567	13	1	24	19	2	3	6	3	3	3	3	1	0	1	0	1	1	1	0	0	0	0	0	1	3	5	5	5	5	5	3	1	1	1	1	1	1	1	1	2	1
1568	IT_PA_1568	13	1	24	20	2	5	7	5	1	11	11	1	0	1	0	1	1	1	1	0	0	0	0	5	5	5	5	5	5	5	5	1	1	1	1	1	1	1	1	1	1
1569	IT_PA_1569	13	1	24	18	2	3	5	4	1	3	3	0	0	1	0	1	0	1	0	0	0	0	0	4	5	4	4	5	3	5	3	2	2	2	3	1	4	1	1	2	1
1570	IT_PA_1570	13	1	24	18	2	5	6	5	1	3	3	0	0	0	0	0	1	0	0	1	0	0	0	5	2	4	4	5	4	5	4	3	2	3	2	1	4	3	1	3	2
1571	IT_PA_1571	13	1	24	19	1	5	6	4	1	3	3	1	0	1	1	1	1	1	1	1	0	0	1	4	3	5	5	5	3	4	3	3	3	4	1	1	2	1	1	1	1
1572	IT_PA_1572	13	1	24	21	1	5	7	3	1	11	11	1	0	1	0	1	0	1	0	1	0	0	0	5	3	5	4	5	4	5	3	2	4	1	1	1	1	1	1	1	1
1573	IT_PA_1573	13	1	24	19	1	2	6	4	1	3	3	1	0	1	0	1	1	1	0	0	0	1	1	5	4	4	4	4	3	4	4	3	3	3	4	3	3	2	3	4	2
1574	IT_PA_1574	13	1	24	19	1	5	5	4	1	11	11	1	1	1	0	1	1	1	1	0	0	1	1	3	4	5	4	5	5	5	5	1	1	1	1	1	1	1	1	1	1
1575	IT_PA_1575	13	1	24	21	2	3	7	4	1	11	11	0	0	0	0	0	1	1	1	0	0	0	0	2	3	4	3	4	2	4	2	2	2	1	1	1	3	1	1	2	1
1576	IT_PA_1576	13	1	24	19	99	3	6	5	2	4	4	1	1	0	0	0	0	1	1	0	0	99	1	4	3	4	4	3	2	5	3	99	99	99	99	99	99	99	99	99	99
1578	IT_PA_1578	13	1	24	18	1	3	4	3	1	11	11	1	0	1	0	1	1	1	1	1	0	1	0	5	5	5	5	5	4	5	5	1	1	3	1	1	1	1	1	1	1
1579	IT_PA_1579	13	1	24	19	1	3	99	4	1	3	3	0	0	0	0	0	0	0	0	99	0	1	1	4	4	4	3	5	4	5	4	4	3	4	3	2	4	4	3	4	4
1580	IT_PA_1580	13	1	24	18	1	3	5	4	1	3	3	0	0	0	0	1	1	1	1	0	0	0	0	5	3	5	5	5	4	5	5	2	2	2	2	1	2	2	2	2	1
1581	IT_PA_1581	13	1	24	19	2	5	6	4	1	3	3	1	1	1	0	1	1	1	1	0	0	1	0	5	4	4	4	4	4	4	4	4	4	3	4	2	4	3	3	3	3
1582	IT_PA_1582	13	1	24	22	2	1	6	4	2	11	11	1	0	1	0	1	1	1	0	0	0	0	0	4	4	4	3	5	5	4	4	1	1	1	1	1	1	1	1	1	1
1583	IT_PA_1583	13	1	24	19	2	5	6	5	2	3	3	0	0	0	0	0	0	1	0	0	0	0	99	4	2	5	2	5	2	5	4	3	3	4	3	2	1	2	2	4	1
1584	IT_PA_1584	13	1	24	19	2	3	7	5	1	3	3	0	0	0	1	0	0	0	0	0	0	0	0	5	4	5	3	4	3	4	3	4	4	4	4	3	4	3	3	3	3
1585	IT_PA_1585	13	1	24	18	2	5	6	5	1	3	3	0	0	0	0	0	0	1	1	0	0	0	0	5	1	4	3	5	2	5	1	3	3	3	3	2	2	4	1	3	1
1586	IT_PA_1586	13	1	24	19	2	5	6	4	1	11	11	1	0	1	1	1	1	1	0	0	0	0	0	5	5	5	5	5	5	5	5	2	1	1	1	1	1	1	1	1	1
1587	IT_PA_1587	13	1	24	19	2	1	7	4	2	11	11	1	0	1	0	1	1	1	1	0	0	0	0	4	4	3	4	4	4	4	4	99	99	99	99	99	99	99	99	99	99
1588	IT_PA_1588	13	1	24	18	2	5	6	4	1	3	3	1	0	1	0	1	1	1	1	1	1	0	0	5	5	4	5	5	2	5	5	4	4	3	4	3	5	5	3	5	3
1589	IT_PA_1589	13	1	24	19	1	3	6	4	1	11	11	0	0	0	0	1	0	0	0	0	0	1	0	4	4	4	4	4	4	4	3	99	99	99	99	99	99	99	99	99	99
1590	IT_PA_1590	13	1	24	19	2	5	6	4	1	3	3	1	0	1	0	1	1	1	1	0	0	1	1	4	2	4	3	5	2	5	3	5	4	4	4	3	4	2	3	4	3
1591	IT_PA_1591	13	1	24	19	2	1	5	4	1	3	3	1	0	1	0	0	0	1	0	0	0	0	0	3	3	5	4	5	3	5	3	3	3	3	3	1	3	2	1	2	1
1592	IT_PA_1592	13	1	24	19	2	1	6	4	3	3	3	0	0	0	0	0	1	0	0	0	0	1	0	1	5	4	5	5	4	4	5	5	4	4	5	3	5	4	5	5	3
1593	IT_PA_1593	13	1	24	20	2	1	6	4	1	11	11	0	0	0	0	0	0	1	0	0	0	0	0	5	3	5	5	5	3	5	3	99	99	99	99	99	99	99	99	99	99
1594	IT_PA_1594	13	1	24	19	2	3	7	5	1	1	1	1	0	1	0	1	1	1	1	0	0	1	0	5	2	4	1	5	2	5	1	5	5	5	5	5	5	4	5	5	5
1595	IT_PA_1595	13	1	24	22	2	3	6	4	1	1	1	0	1	0	0	0	0	1	0	99	0	0	0	3	2	4	5	4	4	4	3	99	99	99	99	99	99	99	99	99	99
1596	IT_PA_1596	13	1	24	20	1	3	6	4	1	3	3	0	0	0	0	0	0	1	0	0	1	0	1	4	5	5	4	4	3	4	1	5	1	4	4	4	5	4	4	5	4
1597	IT_PA_1597	13	1	24	19	2	5	6	5	1	3	3	1	0	0	1	0	0	1	1	0	0	0	0	4	3	5	5	5	4	5	4	3	4	3	4	3	3	4	4	4	3
1598	IT_PA_1598	13	1	24	21	1	5	6	5	1	11	11	1	0	1	0	1	1	1	1	1	0	0	0	5	5	5	5	5	3	5	5	1	1	1	1	1	3	1	1	1	1
1599	IT_PA_1599	13	1	24	20	1	5	6	5	1	11	11	1	0	1	1	1	1	1	0	0	0	0	0	5	5	5	3	5	3	5	5	1	1	1	1	1	1	1	1	1	1
1600	IT_PA_1600	13	1	24	20	1	5	5	4	1	13	12	1	0	0	1	1	1	1	0	0	0	1	1	4	4	4	5	5	4	5	4	2	3	2	2	2	2	1	3	1	1
1602	IT_PA_1602	13	1	24	21	2	4	7	4	1	3	3	0	0	0	0	0	0	1	1	0	0	1	1	1	5	5	5	5	4	4	5	5	5	4	5	4	4	4	5	4	3
1604	IT_PA_1604	13	1	24	18	2	99	6	4	1	2	2	1	0	1	0	0	0	1	0	0	0	1	1	5	4	4	4	5	4	5	4	4	5	5	3	99	4	3	3	4	3
1605	IT_PA_1605	13	1	24	20	1	4	6	4	1	3	3	1	0	0	0	1	0	1	1	0	0	0	1	4	5	4	3	4	4	3	3	4	3	4	3	2	4	3	3	4	3
1606	IT_PA_1606	13	1	24	20	2	4	7	4	1	11	11	1	0	1	0	1	1	1	1	0	0	1	0	4	4	4	4	5	99	4	4	2	1	1	1	1	2	1	1	1	1
1607	IT_PA_1607	13	1	24	18	1	5	5	4	1	3	3	1	0	1	0	1	1	1	1	0	0	1	1	5	3	4	4	5	3	5	3	3	3	4	3	1	3	2	1	4	1
1608	IT_PA_1608	13	1	24	19	1	5	6	4	1	3	3	0	0	1	0	0	0	1	0	0	0	0	0	4	5	4	3	4	2	4	3	1	2	2	1	1	2	1	1	1	1
1609	IT_PA_1609	13	1	24	19	1	5	6	4	1	3	3	1	0	1	0	1	1	1	0	0	0	0	1	5	5	4	5	5	4	5	5	4	4	3	3	2	3	3	3	3	3
1610	IT_PA_1610	13	1	24	20	2	5	7	4	1	3	3	0	1	1	1	1	0	1	1	1	1	1	0	4	4	3	4	5	3	5	4	4	4	3	4	2	3	3	3	4	2
1611	IT_PA_1611	13	1	24	20	1	4	7	4	1	3	3	0	1	1	0	1	1	1	0	0	1	1	0	5	4	5	5	5	5	5	5	4	3	3	4	2	3	2	3	4	2
1612	IT_PA_1612	13	1	24	19	1	4	7	5	1	1	1	1	0	1	0	1	1	1	1	0	1	1	0	5	4	4	4	4	4	4	1	5	5	5	5	4	5	3	5	1	1
1613	IT_PA_1613	13	1	24	18	1	5	5	5	1	11	11	1	1	1	0	1	1	0	0	0	1	1	0	1	1	4	2	5	2	3	1	1	1	1	1	1	1	1	1	1	1
1615	IT_PA_1615	13	1	24	21	1	4	5	4	1	3	3	0	0	1	0	0	1	1	1	0	0	1	1	5	3	4	4	5	4	5	3	3	3	3	2	2	3	2	2	2	2
1616	IT_PA_1616	13	1	24	18	1	5	5	5	3	11	11	0	1	0	0	0	0	1	1	0	0	0	0	3	4	4	5	5	4	3	5	1	2	1	1	1	1	1	2	1	1
1618	IT_PA_1618	13	1	24	19	2	3	6	5	1	13	12	0	0	1	0	1	1	1	1	0	0	1	0	5	4	5	5	5	5	5	5	3	4	4	3	4	3	3	2	1	1
1619	IT_PA_1619	13	1	24	19	2	4	5	5	1	3	3	1	0	1	0	0	1	1	1	0	0	1	1	5	4	4	5	3	2	4	5	1	1	1	1	1	1	1	1	1	1
1620	IT_PA_1620	13	1	24	19	1	5	6	4	1	13	12	1	0	1	0	1	1	1	1	0	0	1	1	4	5	5	5	5	4	5	5	2	2	3	2	2	2	1	1	2	1
1624	IT_PA_1624	13	1	24	19	1	5	6	4	1	3	3	1	0	1	0	1	0	1	1	0	0	0	1	5	4	5	4	5	4	5	4	3	2	4	3	2	2	4	2	2	2
1625	IT_PA_1625	13	1	24	19	1	5	6	4	2	11	11	0	0	0	0	0	0	1	0	0	1	0	0	5	3	5	3	5	4	5	4	2	3	2	2	1	2	2	2	3	2
1626	IT_PA_1626	13	1	24	20	1	5	6	5	1	3	3	1	0	1	0	1	1	1	1	0	0	1	1	2	4	5	4	5	4	2	4	3	4	2	4	1	4	4	1	4	1
1627	IT_PA_1627	13	1	24	19	1	3	6	4	3	3	3	1	0	1	0	1	1	1	1	0	1	1	1	4	3	4	4	5	1	4	3	4	4	5	4	3	3	3	4	4	4
1628	IT_PA_1628	13	1	24	21	1	1	6	4	2	3	3	0	1	1	0	1	1	1	1	0	0	0	0	5	5	5	5	5	5	5	3	1	1	1	1	1	1	1	1	1	1
1629	IT_PA_1629	13	1	24	20	1	2	7	4	1	3	3	0	1	1	0	1	0	1	1	0	0	1	1	5	3	5	4	5	2	5	3	1	1	1	1	1	2	1	1	1	1
1630	IT_PA_1630	13	1	24	19	2	4	6	5	1	3	3	1	0	0	0	1	1	1	1	1	0	1	1	5	4	5	5	5	4	5	5	5	4	5	5	3	5	2	4	5	3
1631	PO_SA_1631	18	2	25	19	2	2	4	3	3	3	3	1	0	1	0	0	0	0	0	99	0	1	0	5	3	99	99	99	4	2	5	4	3	1	5	3	4	4	3	5	1
1632	PO_SA_1632	18	2	25	19	2	4	4	5	1	3	3	99	99	99	99	99	99	99	99	99	99	99	99	99	99	99	99	99	99	99	99	99	99	99	99	99	99	99	99	99	99
1633	PO_SA_1633	18	2	25	18	2	2	4	3	3	11	11	0	0	0	0	1	0	1	1	0	0	99	1	99	99	99	99	99	99	99	99	5	99	99	99	99	99	99	99	99	99
1634	PO_SA_1634	18	2	25	19	2	2	4	3	1	3	3	0	0	0	1	0	0	1	1	0	0	0	1	5	99	99	99	99	99	99	99	5	5	5	5	5	1	4	5	1	1
1637	PO_SA_1637	18	2	25	19	2	2	4	4	1	3	3	1	0	1	0	1	0	1	0	0	0	0	0	99	99	99	99	99	99	99	99	99	99	99	99	99	99	99	99	99	99
1638	PO_SA_1638	18	2	25	18	2	2	3	4	1	3	3	0	0	0	0	0	0	1	1	0	0	1	1	99	99	99	99	99	99	99	99	4	4	2	3	2	3	4	1	3	1
1640	PO_SA_1640	18	2	25	18	2	2	4	4	1	11	11	0	0	0	0	0	0	1	1	0	0	0	0	5	99	99	99	99	99	99	99	99	99	99	99	99	99	99	99	99	99
1641	PO_SA_1641	18	2	25	25	2	2	3	5	1	6	5	1	1	0	0	0	0	0	0	0	1	0	0	5	5	5	2	5	99	5	5	5	5	5	5	2	5	5	5	5	3
1642	LA_RI_1642	14	1	26	20	2	5	3	3	1	2	2	0	0	0	0	0	0	1	0	0	0	0	0	4	2	3	1	1	4	2	1	2	2	2	2	1	2	2	2	2	1
1643	LA_RI_1643	14	1	26	20	2	5	4	4	1	11	11	0	0	0	0	0	0	1	0	0	0	99	0	5	3	4	5	4	1	3	3	1	1	1	1	1	5	3	1	1	1
1644	LA_RI_1644	14	1	26	19	1	5	4	4	1	11	11	1	0	1	0	1	1	0	0	0	0	1	0	5	5	5	5	5	4	5	2	1	2	1	1	1	1	1	1	1	1
1645	LA_RI_1645	14	1	26	19	2	5	5	5	1	1	1	0	0	0	0	0	0	1	1	0	0	0	0	2	2	1	2	2	1	2	1	5	5	5	5	5	5	5	5	5	5
1646	LA_RI_1646	14	1	26	19	2	5	2	5	1	3	3	0	0	0	0	0	0	1	1	0	0	1	0	5	5	3	2	2	3	4	1	3	3	2	2	5	1	1	1	1	1
1647	LA_RI_1647	14	1	26	19	2	5	3	4	1	13	12	0	0	0	0	0	99	1	0	1	0	1	99	5	3	5	4	5	4	5	2	4	4	3	4	5	5	2	1	1	1
1648	LA_RI_1648	14	1	26	19	1	5	3	5	1	1	1	0	0	0	0	0	0	1	1	0	0	1	0	1	1	1	1	4	1	1	1	5	5	5	5	5	5	5	5	1	4
1649	LA_RI_1649	14	1	26	19	2	5	3	4	1	2	2	0	0	0	0	0	0	1	1	0	0	1	0	5	3	3	3	3	3	3	3	5	5	3	5	4	4	4	4	5	4
1650	LA_RI_1650	14	1	26	19	2	3	6	5	1	12	12	0	1	0	1	0	0	1	0	1	0	1	1	5	2	5	5	3	5	5	1	3	4	4	3	1	1	1	1	1	1
1651	LA_RI_1651	14	1	26	19	2	5	4	3	1	3	3	0	0	0	0	0	0	0	0	1	0	0	0	5	4	5	1	5	1	5	1	4	5	4	4	3	5	4	4	3	2
1653	LA_RI_1653	14	1	26	19	2	5	4	5	1	11	11	0	0	0	0	0	0	1	1	0	0	1	0	5	5	5	2	5	1	5	4	3	3	4	3	1	5	1	1	1	1
1654	LA_RI_1654	14	1	26	20	2	5	4	4	1	2	2	0	0	0	0	0	0	1	1	0	0	0	0	5	1	5	3	5	2	5	1	3	3	3	1	1	4	3	1	3	1
1655	LA_RI_1655	14	1	26	19	2	5	6	4	1	1	1	0	0	0	0	0	0	0	0	0	0	0	0	5	4	4	5	5	4	4	5	5	5	5	5	4	5	5	5	5	4
1656	LA_RI_1656	14	1	26	19	2	5	6	4	1	13	12	1	0	0	0	1	0	1	0	0	0	0	0	4	3	3	2	3	2	4	3	4	4	3	4	3	5	5	4	4	3
1657	LA_RI_1657	14	1	26	19	2	5	4	3	1	2	2	0	0	0	0	0	0	0	0	0	1	1	0	5	4	5	4	5	4	5	4	5	5	4	4	2	3	4	4	4	4
1658	LA_RI_1658	14	1	26	19	2	5	4	4	1	11	11	0	0	0	0	0	0	1	0	0	0	0	0	5	4	4	4	5	4	4	4	1	1	1	1	1	1	1	1	1	1
1659	LA_RI_1659	14	1	26	19	2	5	4	5	1	11	11	0	1	0	0	0	0	1	0	0	1	0	0	5	4	4	3	5	4	5	2	1	1	1	1	1	1	1	1	1	1
1660	LA_RI_1660	14	1	26	19	2	3	4	4	1	13	12	0	0	1	0	0	0	99	0	0	0	0	1	5	5	5	3	3	3	5	5	1	1	3	1	1	3	1	1	2	1
1661	LA_RI_1661	14	1	26	18	2	5	4	4	3	3	3	1	0	0	0	0	0	1	1	0	0	0	0	5	4	5	3	5	3	5	3	3	4	1	1	1	5	2	1	3	1
1662	LA_RI_1662	14	1	26	21	2	3	4	5	1	11	11	0	0	0	0	0	0	1	0	0	0	0	0	5	5	5	3	4	4	5	4	4	3	4	4	1	2	4	2	1	1
1663	LA_RI_1663	14	1	26	20	2	5	4	4	2	2	2	1	0	0	0	0	0	1	1	0	0	1	1	4	5	3	2	4	3	5	2	4	4	5	5	3	5	4	3	5	5
1665	LA_RI_1665	14	1	26	19	2	5	4	4	1	3	3	0	0	0	0	1	0	1	0	0	0	1	0	5	5	4	4	4	4	5	4	5	5	4	5	3	5	5	4	5	4
1667	LA_RI_1667	14	1	26	20	2	5	3	4	1	2	2	0	0	0	1	0	0	1	1	0	0	99	0	1	1	1	1	5	1	1	1	5	5	5	5	5	5	5	5	5	5
1668	LA_RI_1668	14	1	26	18	2	5	4	5	1	11	11	0	0	0	0	0	0	0	0	0	0	0	1	5	5	5	3	5	5	5	5	5	5	4	5	4	5	5	4	2	3
1669	LA_RI_1669	14	1	26	19	2	5	4	5	1	1	1	0	0	0	0	0	0	0	1	0	0	0	1	5	5	5	5	5	1	5	5	1	1	1	1	1	1	1	1	1	1
1670	LA_RI_1670	14	1	26	19	2	3	4	5	1	13	12	0	0	0	0	1	0	1	0	0	0	0	0	5	4	4	5	5	4	5	1	5	5	5	5	3	5	5	5	5	5
1671	LA_RI_1671	14	1	26	19	2	5	4	3	1	11	11	0	0	0	0	0	0	1	0	0	0	0	0	4	4	4	5	5	5	4	2	1	1	1	1	1	5	1	1	1	1
1673	LA_RI_1673	14	1	26	18	2	5	4	3	1	13	12	0	0	1	0	0	0	1	1	0	0	1	0	5	5	4	3	2	3	5	3	4	4	4	4	3	5	3	2	2	2
1674	LA_RI_1674	14	1	26	19	2	5	5	5	1	12	12	1	0	1	1	0	0	1	0	0	1	1	0	5	3	5	2	5	2	3	5	5	5	5	4	3	4	4	3	5	3
1679	LA_RI_1679	14	1	26	18	2	2	3	4	1	11	11	0	0	0	0	0	0	0	0	0	0	1	0	5	4	5	2	4	4	5	3	5	5	4	3	3	4	5	3	1	1
1681	LA_RI_1681	14	1	26	19	2	3	3	5	1	2	2	0	0	0	0	1	0	1	0	0	0	0	0	5	5	5	2	4	4	3	3	4	4	1	5	1	5	4	2	1	1
1682	LA_RI_1682	14	1	26	24	2	4	4	4	1	11	11	0	0	0	0	0	0	1	1	0	0	1	1	5	5	5	2	5	4	5	5	4	3	3	3	1	4	5	1	1	3
1684	LA_RI_1684	14	1	26	19	2	5	4	3	1	11	11	0	0	0	1	0	0	1	1	0	0	0	0	5	4	3	4	4	3	5	2	4	3	3	2	2	2	3	3	1	3
1692	LA_RI_1692	14	1	26	23	2	3	4	3	1	3	3	0	0	0	0	1	1	1	1	0	0	0	0	5	4	4	2	5	5	5	3	5	5	5	5	2	4	3	4	5	3
1701	LA_RI_1701	14	1	27	19	2	4	4	4	1	11	11	0	0	0	1	0	0	1	99	0	0	0	0	4	4	3	4	4	3	4	3	3	3	3	1	1	4	3	1	3	2
1702	LA_RI_1702	14	1	27	23	2	5	4	3	3	13	12	0	0	0	0	0	0	99	0	0	0	0	0	5	5	5	3	5	4	4	3	4	4	4	3	1	3	4	1	3	3
1703	LA_RI_1703	14	1	27	19	2	5	4	4	1	12	12	0	0	0	0	0	1	99	0	99	0	1	1	5	1	99	3	3	2	2	1	5	5	5	5	3	5	3	4	5	3
1709	LA_RI_1709	14	1	27	20	2	5	6	5	1	3	3	0	0	0	0	0	0	1	1	0	0	0	1	5	5	5	3	5	5	5	3	5	5	5	5	5	5	5	5	5	5
1711	LA_RI_1711	14	1	27	25	2	5	4	4	1	11	11	0	0	0	0	0	0	1	1	0	0	0	0	4	3	3	3	4	4	3	3	2	2	2	2	1	4	4	2	3	3
1717	LA_RI_1717	14	1	27	20	2	5	5	4	1	3	3	0	0	0	0	0	0	1	1	0	0	0	0	2	4	3	1	3	4	4	3	5	4	5	4	5	4	5	4	5	3
1721	LA_RI_1721	14	1	27	19	2	5	4	5	1	2	2	1	0	0	0	0	0	0	0	0	0	0	0	5	4	5	3	4	3	5	1	5	5	5	5	4	5	5	5	5	5
1723	LA_RI_1723	14	1	27	19	2	5	4	4	3	3	3	0	0	0	1	1	0	0	0	0	0	0	0	4	4	4	2	4	4	4	2	5	5	3	4	3	4	4	4	3	4
1724	LA_RI_1724	14	1	27	20	2	5	4	4	2	3	3	0	0	0	1	0	0	0	0	0	0	1	0	4	4	4	2	4	4	4	2	5	5	3	4	3	4	4	4	4	4
1761	BH_SJ_1761	3	2	28	20	2	3	4	5	1	13	12	0	0	0	0	0	0	1	0	1	0	0	99	4	4	4	3	4	3	4	2	1	1	1	1	1	1	1	1	1	1
1762	BH_SJ_1762	3	2	28	19	1	4	1	5	1	10	12	0	0	0	1	0	0	0	0	0	0	1	1	5	5	5	5	5	5	5	5	5	5	5	5	5	1	5	5	5	5
1763	BH_SJ_1763	3	2	28	19	2	5	6	5	1	6	5	1	0	0	1	0	1	0	0	1	0	1	99	4	3	4	3	5	3	4	3	5	5	5	5	5	5	5	5	5	99
1764	BH_SJ_1764	3	2	28	20	2	2	3	3	3	11	11	0	0	0	0	0	0	99	0	99	0	99	99	99	99	99	99	99	99	99	99	3	1	2	1	1	1	1	1	1	99
1765	BH_SJ_1765	3	2	28	19	2	4	1	4	1	11	11	0	1	0	0	0	1	0	0	0	0	0	0	4	4	4	5	4	5	5	4	1	2	99	1	1	1	1	1	1	1
1766	BH_SJ_1766	3	2	28	19	1	3	1	3	3	6	5	0	99	0	0	0	0	1	0	0	0	0	0	5	5	5	4	5	5	5	5	5	5	5	5	5	5	5	5	5	5
1767	BH_SJ_1767	3	2	28	18	1	2	5	4	1	10	12	1	1	1	0	1	1	1	1	99	0	1	1	5	5	5	3	5	1	5	5	1	1	1	1	1	1	1	1	1	1
1768	BH_SJ_1768	3	2	28	19	1	4	1	4	1	11	11	0	0	0	0	0	0	0	0	0	0	0	0	5	4	5	3	4	4	3	3	1	1	1	1	1	4	3	1	3	3
1769	BH_SJ_1769	3	2	28	19	1	4	4	4	1	10	12	0	0	0	0	0	0	1	0	99	0	1	99	4	4	4	5	4	3	3	3	99	99	99	99	99	99	99	99	99	99
1770	BH_SJ_1770	3	2	28	19	2	5	4	4	1	4	4	0	0	0	0	0	0	1	1	0	99	0	0	1	1	1	1	4	1	1	1	5	5	5	5	5	5	5	5	5	5
1771	BH_SJ_1771	3	2	28	20	1	4	5	5	1	6	5	0	0	0	0	0	0	1	1	0	0	1	0	99	99	99	99	99	99	99	99	5	5	5	5	5	5	5	5	5	5
1772	BH_SJ_1772	3	2	28	18	2	4	4	5	1	13	12	0	0	0	0	0	0	0	0	0	0	0	0	4	4	4	4	5	4	3	4	5	5	5	5	4	4	4	4	5	4
1773	BH_SJ_1773	3	2	28	19	2	4	4	5	1	5	12	1	0	1	0	1	0	1	0	0	99	0	0	5	4	5	5	5	5	5	5	5	5	4	4	3	5	5	3	5	1
1774	BH_SJ_1774	3	2	28	19	2	4	5	5	1	6	5	0	0	0	0	0	0	0	0	0	0	0	0	4	2	4	5	4	3	4	2	5	5	5	4	5	5	4	4	5	5
1775	BH_SJ_1775	3	2	28	19	1	4	1	5	1	12	12	0	0	1	0	99	0	1	0	0	0	0	0	5	5	5	5	99	4	5	5	1	1	1	1	1	1	1	1	1	1
1776	BH_SJ_1776	3	2	28	19	1	2	2	3	3	6	5	0	1	0	0	0	0	0	0	0	0	0	0	5	3	3	1	3	4	3	4	5	5	5	5	5	5	5	4	5	3
1777	BH_SJ_1777	3	2	28	18	1	4	4	4	1	6	5	0	0	0	1	0	0	1	0	99	1	0	0	4	1	1	3	99	99	3	4	5	5	5	4	5	5	5	5	5	3
1778	BH_SJ_1778	3	2	28	19	2	4	6	5	1	6	5	0	0	0	0	0	0	1	0	0	1	1	0	5	4	4	4	5	4	2	4	5	5	5	5	3	5	5	3	5	3
1779	BH_SJ_1779	3	2	28	19	2	4	5	5	1	6	5	0	0	0	0	0	0	1	0	0	1	1	0	5	5	4	5	5	5	2	5	5	5	5	5	5	5	5	5	5	3
1780	BH_SJ_1780	3	1	28	19	2	4	6	5	1	6	5	99	0	0	99	99	0	1	1	99	99	99	0	99	99	99	99	99	99	99	99	99	99	99	99	99	99	99	99	99	99
1781	BH_SJ_1781	3	1	28	19	2	5	7	5	1	99	99	1	0	1	1	1	1	0	1	99	99	99	99	99	99	99	99	99	99	99	99	99	99	99	99	99	99	99	99	99	99
1782	BH_SJ_1782	3	1	28	20	2	5	5	5	1	6	5	1	0	0	0	0	0	0	0	99	0	0	1	4	4	3	3	3	4	4	3	5	5	5	5	5	5	5	5	5	5
1783	BH_SJ_1783	3	1	28	19	2	4	4	5	1	4	4	0	0	0	0	0	0	0	99	0	0	0	99	99	99	99	99	99	99	99	99	5	5	5	4	4	4	3	3	3	3
1784	BH_SJ_1784	3	1	28	19	2	4	5	4	3	6	5	0	0	1	0	0	1	99	0	0	0	0	0	5	5	5	1	5	5	5	1	5	5	5	5	5	5	5	5	5	5
1785	BH_SJ_1785	3	1	28	18	2	5	7	4	1	6	5	1	0	1	0	1	1	1	0	0	0	99	99	99	99	99	99	99	99	99	99	5	5	5	99	99	99	99	99	99	99
1786	BH_SJ_1786	3	1	28	18	2	4	6	4	1	3	3	1	0	1	0	1	0	0	0	0	0	0	0	99	99	99	99	99	99	99	99	5	5	99	99	99	99	99	99	99	99
1787	BH_SJ_1787	3	1	28	20	2	5	5	5	1	6	5	0	0	0	1	0	0	1	1	0	0	0	0	2	5	3	99	99	2	4	5	5	5	5	5	5	5	5	5	5	4
1788	BH_SJ_1788	3	1	28	19	2	5	6	5	1	6	5	0	0	0	0	0	0	1	1	0	0	1	0	99	99	99	99	99	99	99	99	99	99	99	99	99	99	99	99	99	99
1789	BH_SJ_1789	3	1	28	19	2	5	4	4	1	6	5	0	0	0	1	0	0	1	1	0	0	0	0	1	3	5	2	3	3	4	2	5	5	5	4	5	5	4	5	5	4
1790	BH_SJ_1790	3	1	28	19	2	5	7	5	1	13	12	1	0	1	0	1	1	0	0	0	0	1	1	5	5	5	4	5	5	5	5	1	1	1	1	1	1	1	1	1	1
1791	BH_SJ_1791	3	1	28	19	2	5	7	5	1	13	12	1	0	0	0	0	0	1	1	0	0	1	0	5	5	5	1	5	5	5	1	1	1	1	1	1	1	1	1	1	1
1792	BH_SJ_1792	3	1	28	19	2	5	6	4	1	13	12	0	0	0	0	0	0	1	0	0	0	0	0	5	5	5	2	5	2	1	99	2	5	4	2	2	4	2	2	4	2
1793	BH_SJ_1793	3	1	28	19	2	4	7	5	1	4	4	0	0	0	0	0	0	1	1	0	0	0	0	5	2	5	5	5	3	3	1	5	5	5	5	5	5	5	5	5	3
1794	BH_SJ_1794	3	1	28	19	2	5	7	5	1	8	5	0	0	1	0	1	1	1	1	0	1	1	0	99	99	99	99	99	99	99	99	99	99	99	99	99	99	99	99	99	99
1795	BH_SJ_1795	3	1	28	19	2	5	5	5	1	11	11	1	0	1	0	1	1	1	1	99	0	0	0	99	99	99	99	99	99	99	99	99	99	99	99	99	99	99	99	99	99
1796	BH_SJ_1796	3	1	28	18	2	5	6	5	1	13	12	0	0	0	1	0	1	1	1	0	0	0	0	99	99	99	99	99	99	99	99	99	99	99	99	99	99	99	99	99	99
1797	BH_SJ_1797	3	1	28	19	2	5	4	5	2	6	5	0	0	0	0	0	0	0	99	0	0	0	0	99	99	99	99	99	99	99	99	4	4	4	4	3	4	4	4	4	4
1798	BH_SJ_1798	3	1	28	19	2	5	6	4	1	6	5	0	0	0	0	0	0	0	0	0	0	0	0	3	3	4	3	2	4	3	4	5	5	5	4	3	5	5	4	3	4
1799	BH_SJ_1799	3	1	28	19	2	5	6	5	1	8	5	0	0	0	0	1	0	0	0	0	0	0	0	99	99	99	99	99	99	99	99	99	99	99	99	99	99	99	99	99	99
1800	BH_SJ_1800	3	1	28	20	2	5	6	5	1	6	5	99	0	0	0	0	0	1	0	0	0	0	1	99	99	99	99	99	99	99	99	5	5	99	5	99	99	99	99	99	99
1801	BH_SJ_1801	3	1	28	19	2	5	6	4	1	6	5	1	0	0	1	0	0	1	99	99	99	99	99	99	99	99	99	99	99	99	99	99	99	99	99	99	99	99	99	99	99
1802	BH_SJ_1802	3	1	28	20	2	5	7	5	1	6	5	0	0	0	0	1	0	1	0	0	0	1	0	99	99	99	99	99	99	99	99	99	99	99	99	99	99	99	99	99	99
1803	BH_SJ_1803	3	1	28	19	2	5	7	5	1	13	12	0	0	0	0	0	0	99	99	0	99	99	99	99	99	99	99	99	99	99	99	99	99	99	99	99	99	99	99	99	99
1804	BH_SJ_1804	3	1	28	19	2	5	7	5	1	6	5	1	0	0	0	0	0	0	0	0	0	1	0	3	5	99	3	3	3	3	3	99	99	99	99	99	99	99	99	99	99
1805	BH_SJ_1805	3	1	28	18	2	4	6	5	1	10	12	99	99	99	99	99	99	99	99	99	99	99	99	99	99	99	99	99	99	99	99	99	99	99	99	99	99	99	99	99	99
1807	BH_SJ_1807	3	1	28	19	2	5	7	5	1	6	5	1	1	0	0	0	0	1	0	0	0	0	0	5	3	4	1	4	3	5	5	5	5	5	1	1	1	3	3	3	3
1808	BH_SJ_1808	3	1	28	19	2	5	7	5	2	11	11	0	0	0	0	0	0	99	0	99	0	99	1	5	5	5	5	5	4	5	5	1	1	1	1	1	1	1	1	1	1
1809	BH_SJ_1809	3	2	28	19	2	2	4	4	1	6	5	0	0	0	0	0	0	0	0	0	99	1	0	5	4	5	5	3	4	2	4	5	5	5	4	5	5	5	5	4	5
1810	BH_SJ_1810	3	2	28	19	1	4	99	4	1	6	5	0	0	0	0	0	0	0	0	0	99	1	0	5	5	4	1	5	5	4	5	99	99	99	99	99	99	99	99	99	99
1811	BH_SJ_1811	3	2	28	19	2	4	3	4	1	6	5	0	0	0	0	0	0	0	0	0	99	1	0	5	4	4	4	4	3	4	1	5	5	5	5	4	5	5	5	4	4
1812	BH_SJ_1812	3	2	28	19	1	5	5	5	1	6	5	0	0	0	0	0	0	1	0	0	0	99	0	4	4	4	4	4	3	4	5	5	4	99	3	3	3	3	3	3	3
1813	BH_SJ_1813	3	2	28	18	2	5	3	5	1	6	5	0	0	0	0	0	0	1	0	0	0	0	0	5	4	1	5	1	1	1	5	5	5	5	4	4	5	4	4	5	4
1814	BH_SJ_1814	3	2	28	19	2	4	5	5	1	6	5	1	0	0	0	0	0	0	0	0	0	0	1	4	4	3	3	2	4	2	5	5	5	4	3	5	5	5	5	5	5
1815	BH_SJ_1815	3	2	28	19	2	4	2	3	2	6	5	0	0	0	0	0	0	0	0	0	0	0	0	3	3	3	3	3	3	3	3	5	5	5	5	5	5	5	5	5	5
1816	BH_SJ_1816	3	2	28	19	1	4	5	4	1	12	12	1	0	0	1	0	1	1	1	0	1	0	0	1	3	2	2	4	3	4	5	5	5	5	5	5	5	5	5	5	5
1817	BH_SJ_1817	3	2	28	19	1	4	99	5	1	6	5	1	0	0	0	0	0	1	1	0	0	1	0	4	4	4	5	5	3	4	5	5	5	5	5	99	5	99	99	5	99
1818	BH_SJ_1818	3	2	28	19	2	4	2	4	1	6	5	1	0	1	0	0	0	99	0	0	0	1	0	3	1	2	2	4	2	3	1	5	5	5	5	5	5	5	5	5	99
1819	BH_SJ_1819	3	2	28	19	2	4	5	5	1	6	5	0	0	0	0	0	0	0	0	0	0	99	0	3	3	3	3	3	3	3	3	5	5	5	5	5	5	5	5	5	5
1820	BH_SJ_1820	3	2	28	20	2	4	2	5	1	6	5	0	0	0	0	0	0	0	0	0	0	99	0	2	3	4	4	4	3	3	3	5	5	5	4	5	5	5	5	5	3
1821	BH_SJ_1821	3	2	28	20	2	4	7	4	1	12	12	1	0	0	0	0	0	1	1	0	1	0	0	5	3	4	4	1	4	3	5	1	2	5	1	1	1	1	1	1	1
1822	BH_SJ_1822	3	2	28	20	1	2	1	5	1	6	5	1	0	1	0	1	1	1	1	1	0	1	0	4	3	4	3	5	5	5	4	99	99	99	99	99	99	99	99	99	99
1823	BH_SJ_1823	3	2	28	19	2	5	7	5	1	11	11	0	0	0	0	0	0	1	0	0	0	0	0	5	5	5	99	5	3	5	5	99	99	99	99	99	99	99	99	99	99
1824	BH_SJ_1824	3	2	28	19	2	2	3	3	1	6	5	0	0	0	0	0	0	0	0	0	0	0	0	2	5	5	5	5	4	5	5	99	99	99	99	99	99	99	99	99	99
1825	BH_SJ_1825	3	2	28	20	2	4	5	4	3	6	5	1	99	99	99	0	0	0	0	1	99	99	0	4	4	4	2	99	4	4	2	5	5	5	4	4	5	5	5	5	5
1826	BH_SJ_1826	3	2	28	19	1	2	3	4	1	6	5	0	0	0	1	0	0	1	1	0	0	99	0	99	99	99	99	99	99	99	99	99	99	99	99	99	99	99	99	99	99
1827	BH_SJ_1827	3	2	28	20	2	4	5	4	1	11	11	1	0	0	0	0	0	1	1	0	0	0	1	4	4	4	4	4	4	4	4	3	3	4	3	2	3	4	2	3	3
1828	BH_SJ_1828	3	2	28	19	2	2	2	3	2	6	5	1	0	0	1	99	0	1	0	99	0	99	1	99	99	3	4	1	2	3	4	99	99	99	99	99	99	99	99	99	99
1829	BH_SJ_1829	3	2	28	19	1	4	1	3	1	13	12	0	0	0	0	1	0	1	0	0	0	1	0	4	4	3	3	4	4	3	3	5	5	5	5	5	5	5	5	5	5
1830	BH_SJ_1830	3	2	28	19	1	4	3	5	99	6	5	1	0	0	0	0	0	1	1	0	0	1	0	2	99	99	2	4	3	3	2	5	5	5	5	5	5	5	5	5	5
1831	BH_SJ_1831	3	2	28	19	2	2	3	5	3	6	5	0	0	0	0	0	0	0	0	0	0	0	0	4	5	3	2	1	4	2	2	3	4	4	1	3	4	3	3	3	1
1832	BH_SJ_1832	3	2	28	19	2	3	1	4	1	13	12	0	0	0	0	0	0	99	0	0	0	0	1	4	2	3	2	3	5	3	2	5	4	4	3	1	5	4	3	1	3
1833	BH_SJ_1833	3	2	28	19	1	4	3	5	1	13	12	0	0	0	0	0	0	1	0	0	0	0	0	1	1	1	4	4	3	4	1	5	5	4	1	1	5	1	1	1	1
1834	BH_SJ_1834	3	2	28	19	1	2	3	2	1	13	12	0	0	0	0	0	0	0	0	0	0	0	0	4	2	3	4	5	4	4	2	99	99	99	99	99	99	99	99	99	99
1835	BH_SJ_1835	3	2	28	19	2	5	5	5	1	6	5	0	0	0	0	0	0	0	1	0	0	99	0	4	4	3	3	4	4	4	2	5	5	5	5	5	99	5	5	5	5
1836	BH_SJ_1836	3	2	28	20	1	3	4	5	1	13	12	0	0	0	0	0	0	0	0	99	0	0	0	3	3	3	3	3	3	3	3	3	3	3	3	3	3	3	3	3	3
1837	BH_SJ_1837	3	1	28	21	2	4	6	5	1	13	12	0	0	0	0	0	0	0	0	99	0	1	1	4	4	4	2	4	4	4	2	5	5	99	99	99	99	99	99	99	99
1838	BH_SJ_1838	3	1	28	18	2	5	5	5	1	6	5	1	0	0	0	0	0	0	0	0	0	0	0	5	4	5	2	3	2	3	5	5	5	5	5	5	5	5	5	5	5
1839	BH_SJ_1839	3	1	28	19	2	5	7	5	1	6	5	0	1	1	0	1	0	1	0	0	0	0	0	99	99	99	99	99	99	99	99	99	99	99	99	99	99	99	99	99	99
1840	BH_SJ_1840	3	1	28	19	2	5	5	5	1	6	5	0	0	99	0	0	1	0	1	0	1	0	0	2	5	4	4	4	4	2	2	5	5	5	5	5	5	5	5	5	5
1841	BH_SJ_1841	3	1	28	19	2	5	5	5	1	6	5	0	0	0	0	1	1	0	0	0	1	1	0	2	3	99	3	4	3	4	2	5	4	99	3	5	4	4	4	4	4
1842	BH_SJ_1842	3	1	28	19	2	5	4	4	1	13	12	0	0	1	0	0	0	1	1	0	0	0	0	4	2	5	1	3	4	3	4	5	5	5	5	4	5	5	5	5	5
1845	BH_SJ_1845	3	1	28	19	2	4	6	4	2	4	4	0	0	1	0	0	0	1	1	0	0	1	0	99	99	99	99	99	99	99	99	99	99	99	99	99	99	99	99	99	99
1846	BH_SJ_1846	3	2	28	20	2	4	6	5	1	6	5	0	1	0	0	0	0	99	0	99	99	99	99	99	99	99	99	99	99	99	99	5	5	4	5	5	5	4	5	5	5
1847	BH_SJ_1847	3	1	28	18	2	5	5	5	1	6	5	99	0	0	0	1	0	1	0	0	0	0	99	4	4	2	2	5	3	5	2	5	5	5	5	5	5	5	5	5	99
1848	BH_SJ_1848	3	2	28	19	2	2	1	4	1	6	5	0	0	1	0	0	0	0	0	0	0	99	99	4	3	4	3	4	3	4	2	5	5	5	5	5	5	5	5	5	5
1849	BH_SJ_1849	3	2	28	19	1	5	1	4	1	11	11	0	0	1	0	0	0	1	1	0	0	1	1	5	3	5	3	3	3	3	3	1	1	1	1	1	1	1	1	1	1
1850	BH_SJ_1850	3	2	28	18	2	2	3	4	1	13	12	0	0	0	0	0	0	1	1	0	0	1	0	5	4	5	2	4	5	5	4	5	5	5	4	4	5	5	5	5	4
1851	BH_SJ_1851	3	2	28	20	1	5	5	5	1	6	5	1	0	1	0	1	1	1	1	1	1	1	0	2	4	5	4	5	4	4	2	5	5	5	5	5	5	5	5	5	5
1853	BH_SJ_1853	3	2	28	19	2	2	4	4	1	6	5	1	0	0	0	1	0	1	1	0	0	1	0	2	3	4	1	5	3	5	3	5	5	5	5	5	5	5	5	5	5
1854	BH_SJ_1854	3	2	28	20	2	4	4	4	1	6	5	99	0	0	0	0	0	0	0	0	0	99	0	4	4	3	3	4	4	3	3	5	5	4	4	4	4	3	3	3	3
1855	BH_SJ_1855	3	2	28	20	1	2	99	4	1	12	12	1	0	0	0	0	1	1	0	0	0	0	0	5	5	2	2	3	1	4	4	5	5	5	2	5	5	2	5	1	1
1856	BH_SJ_1856	3	2	28	19	1	1	3	5	1	6	5	0	0	1	0	0	0	0	0	0	0	1	99	5	4	4	1	3	4	4	1	5	5	5	4	4	5	4	5	5	5
1857	BH_SJ_1857	3	2	28	19	2	2	2	4	3	6	5	0	0	1	1	0	1	1	1	0	0	1	0	5	4	3	3	3	3	3	3	4	4	5	3	4	4	3	4	3	4
1858	BH_SJ_1858	3	2	28	19	2	4	2	4	1	12	12	0	0	1	0	1	0	99	0	99	0	0	0	4	3	3	2	3	3	1	1	5	5	5	5	5	5	99	5	5	99
1859	BH_SJ_1859	3	2	28	19	2	4	5	5	1	11	11	0	0	1	0	1	1	1	0	0	0	0	1	4	3	5	2	5	4	5	3	2	2	1	1	2	1	1	1	1	1
1860	BH_SJ_1860	3	2	28	18	1	2	99	4	2	6	5	1	0	0	0	0	0	1	1	0	0	0	0	5	4	4	4	5	3	5	4	5	5	4	5	2	3	3	3	2	4
1861	BH_SJ_1861	3	2	28	19	2	3	4	3	3	6	5	0	0	99	0	99	99	1	0	1	0	0	0	4	4	3	3	4	3	5	1	5	5	5	5	5	5	4	5	5	5
1862	BH_SJ_1862	3	2	28	19	2	5	4	4	1	6	5	0	0	0	0	0	0	0	0	0	0	1	1	99	99	99	99	99	99	99	99	99	99	99	99	99	99	99	99	99	99
1863	BH_SJ_1863	3	2	28	19	1	4	4	4	1	6	5	0	0	1	0	1	1	1	0	0	0	0	0	5	4	4	99	5	5	5	1	5	5	5	5	5	5	5	5	5	5
1865	BH_SJ_1865	3	2	28	19	2	5	6	5	1	6	5	1	0	0	1	0	1	1	1	0	0	0	0	3	2	4	3	2	4	3	4	5	5	5	5	5	5	5	5	5	5
1866	BH_SJ_1866	3	2	28	19	2	3	5	5	1	6	5	1	0	0	0	0	0	1	0	99	99	1	1	4	5	5	3	5	4	4	3	5	5	5	5	5	5	5	5	5	5
1867	BH_SJ_1867	3	2	28	18	2	4	2	4	1	6	5	1	0	0	0	1	0	0	1	0	0	0	0	5	3	5	1	5	3	5	1	5	5	99	5	5	5	5	5	5	99
1868	BH_SJ_1868	3	2	28	19	1	4	4	3	1	6	5	1	0	0	0	1	0	1	0	99	0	1	0	5	4	4	3	3	4	3	3	4	5	4	3	3	3	2	2	3	4
1869	BH_SJ_1869	3	2	28	19	1	4	2	4	2	13	12	1	0	0	0	0	0	1	1	1	0	0	0	5	4	4	5	5	4	5	99	5	5	5	5	5	5	4	3	4	4
1870	BH_SJ_1870	3	2	28	19	2	4	2	4	1	6	5	0	0	1	0	0	0	1	1	0	0	1	0	5	3	2	3	5	3	1	5	5	5	5	5	5	5	5	5	5	5
1872	AU_GR_1872	1	1	29	21	2	2	7	4	2	11	11	0	0	0	0	1	0	1	0	0	0	1	0	5	3	4	3	5	3	4	3	2	1	3	1	1	2	1	1	1	1
1873	AU_GR_1873	1	1	29	20	1	4	7	4	1	3	3	1	0	0	0	0	0	1	0	0	0	0	0	5	4	4	4	5	4	5	4	3	2	2	3	1	5	2	1	2	2
1874	AU_GR_1874	1	1	29	19	2	4	6	4	1	99	99	1	0	0	0	1	0	0	0	0	0	0	0	5	2	5	2	5	2	5	2	3	1	2	1	1	5	1	1	1	3
1875	AU_GR_1875	1	1	29	19	2	4	7	5	1	3	3	1	0	1	0	1	1	1	0	0	0	1	0	5	5	5	4	5	4	5	5	2	2	2	1	1	2	1	1	2	2
1876	AU_GR_1876	1	1	29	19	2	4	6	4	1	4	4	1	0	1	0	1	1	1	0	0	0	1	0	3	3	3	3	3	3	3	3	3	3	3	3	3	3	3	3	3	3
1877	AU_GR_1877	1	1	29	18	2	5	6	3	1	3	3	0	0	1	0	0	0	1	1	0	0	0	1	3	4	4	4	5	4	4	5	4	3	4	4	4	5	4	3	4	4
1878	AU_GR_1878	1	1	29	19	2	5	5	5	1	4	4	0	0	0	0	0	0	1	0	0	0	0	0	5	4	5	4	5	3	5	3	4	3	3	4	3	4	3	4	4	3
1879	AU_GR_1879	1	1	29	18	2	5	7	5	1	1	1	1	1	1	0	1	1	1	0	0	0	1	0	5	3	5	4	5	3	5	5	1	1	1	1	1	1	1	1	1	1
1880	AU_GR_1880	1	1	29	18	2	5	6	3	1	3	3	1	1	1	0	1	1	1	1	1	0	1	0	5	2	4	2	5	2	5	1	2	2	1	1	1	1	3	1	2	1
1881	AU_GR_1881	1	1	29	19	1	5	7	5	1	12	12	1	0	1	1	1	1	1	1	1	0	1	0	5	1	5	3	5	5	5	1	1	1	1	1	1	1	1	1	1	1
1882	AU_GR_1882	1	1	29	19	2	5	7	3	1	99	99	0	0	1	1	1	1	1	0	0	0	1	0	5	4	3	3	5	4	4	3	3	3	3	3	3	3	3	3	3	3
1883	AU_GR_1883	1	1	29	18	2	5	6	5	1	3	3	1	0	1	0	1	1	1	0	0	0	1	0	5	5	5	4	5	5	5	5	4	3	4	4	3	4	4	2	2	3
1884	AU_GR_1884	1	1	29	19	2	4	7	5	1	3	3	1	0	1	1	1	1	1	1	0	1	1	0	3	4	4	2	5	3	4	3	3	3	3	3	3	3	3	3	3	3
1885	AU_GR_1885	1	1	29	22	2	3	6	3	1	3	3	0	0	0	0	1	0	1	1	0	0	0	0	5	5	5	3	5	4	5	4	1	1	1	1	1	2	1	1	1	1
1886	AU_GR_1886	1	1	29	19	1	5	6	5	1	4	4	1	0	1	0	1	1	1	1	0	0	1	0	5	4	5	4	5	3	5	5	3	2	2	3	1	2	3	2	1	1
1887	AU_GR_1887	1	1	29	19	2	5	6	4	1	3	3	0	0	0	0	1	0	1	1	0	0	0	0	2	5	5	5	5	2	4	5	1	1	1	1	1	2	1	1	1	1
1888	AU_GR_1888	1	1	29	19	2	5	7	5	1	3	3	1	0	1	1	1	1	1	1	0	0	1	0	5	5	5	5	5	5	5	4	5	3	3	4	3	5	5	1	5	3
1889	AU_GR_1889	1	1	29	19	2	5	6	4	2	3	3	0	0	0	0	1	0	0	0	0	1	1	0	4	2	3	3	4	3	4	3	3	3	3	2	2	4	4	3	4	5
1890	AU_GR_1890	1	1	29	21	2	4	7	5	1	3	3	0	0	0	0	1	0	1	0	0	0	1	0	5	5	5	4	5	5	5	4	4	2	3	3	1	5	2	1	2	1
1891	AU_GR_1891	1	1	29	18	2	5	7	4	2	99	99	0	0	0	0	1	1	1	0	0	99	1	0	4	4	2	3	4	4	4	3	3	4	3	4	3	2	2	1	3	2
1892	AU_GR_1892	1	1	29	19	2	5	7	4	2	3	3	1	1	1	0	1	1	1	1	1	0	1	0	5	5	5	5	5	5	5	5	1	1	1	1	1	3	3	1	1	1
1894	AU_GR_1894	1	1	29	19	2	5	6	4	2	99	99	0	0	1	0	1	1	1	0	0	0	1	1	5	5	5	4	5	2	5	5	2	1	1	1	1	1	1	1	1	1
1895	AU_GR_1895	1	1	29	18	2	5	7	5	1	3	3	1	0	1	1	1	1	1	1	0	1	1	0	5	1	5	1	5	3	5	1	2	1	2	1	1	1	2	1	1	1
1896	AU_GR_1896	1	1	29	19	2	5	6	3	1	3	3	1	0	1	0	1	1	1	1	0	0	0	0	5	5	5	5	5	5	5	4	1	1	1	1	1	1	1	1	1	1
1899	AU_GR_1899	1	1	29	18	2	5	7	5	1	3	3	0	0	0	0	0	0	1	1	1	0	1	0	5	3	5	4	5	3	5	3	1	1	1	1	1	1	1	1	1	1
1900	AU_GR_1900	1	1	29	18	2	5	6	5	1	3	3	1	0	1	0	1	0	1	1	1	0	1	1	5	5	4	5	5	4	5	5	4	1	3	2	1	5	3	1	3	1
1901	AU_GR_1901	1	1	29	19	2	5	6	4	1	3	3	1	1	1	1	1	1	1	0	0	0	1	1	5	4	5	4	5	4	5	4	4	2	3	3	2	5	2	1	4	2
1902	AU_GR_1902	1	1	29	19	2	5	2	3	2	3	3	0	0	0	1	0	0	0	0	0	0	0	0	5	4	5	4	4	2	4	4	5	5	4	4	2	4	2	2	2	2
1903	AU_GR_1903	1	1	29	18	2	5	7	3	1	3	3	0	0	0	0	1	0	1	0	0	0	1	1	5	5	4	4	5	3	4	4	2	2	2	2	1	2	1	1	2	1
1904	AU_GR_1904	1	1	29	19	2	5	6	5	1	3	3	1	0	1	0	1	1	1	0	0	0	1	1	5	1	5	4	4	2	5	1	5	5	5	5	5	5	5	5	5	5
1905	AU_GR_1905	1	1	29	19	2	5	6	5	1	1	1	1	0	0	0	1	0	1	0	0	0	1	0	5	3	5	5	5	2	5	4	1	1	1	1	1	1	1	1	1	1
1906	AU_GR_1906	1	1	29	19	2	5	7	5	1	99	99	1	0	1	0	1	1	1	1	1	0	1	1	5	4	5	5	5	4	5	3	1	1	2	5	3	1	1	1	1	1
1907	AU_GR_1907	1	1	29	19	2	5	7	5	1	3	3	1	0	1	0	1	1	1	1	1	0	1	0	5	5	5	4	5	4	5	2	3	4	2	2	2	4	5	4	5	2
1911	AU_GR_1911	1	1	29	18	2	5	6	3	1	3	3	0	0	0	0	1	0	1	0	0	0	1	1	5	3	3	4	4	4	4	2	3	2	2	2	1	5	3	1	1	1
1912	AU_GR_1912	1	1	29	18	2	5	6	5	1	3	3	1	0	1	1	1	1	1	1	0	0	1	0	5	4	4	5	5	5	5	5	4	2	1	4	1	4	1	1	4	1
1913	AU_GR_1913	1	1	29	19	2	5	6	5	1	3	3	0	0	1	0	1	1	1	0	0	0	1	0	5	4	5	5	5	3	5	4	4	1	2	2	1	2	1	1	1	1
1914	AU_GR_1914	1	1	29	20	2	5	7	4	1	11	11	1	0	1	0	1	1	1	0	99	0	0	0	5	5	5	5	5	5	5	5	1	1	1	1	1	1	1	1	1	1
1915	AU_GR_1915	1	1	29	19	2	4	7	4	1	3	3	1	0	1	0	1	0	1	0	0	0	1	0	5	4	4	4	5	4	5	4	99	99	99	99	99	99	99	99	99	99
1916	AU_GR_1916	1	1	29	18	2	5	7	5	1	3	3	0	0	0	0	0	0	1	0	0	0	1	0	5	4	5	3	5	3	5	3	1	1	1	1	1	1	1	1	1	1
1917	AU_GR_1917	1	1	29	18	2	5	6	4	1	3	3	0	1	1	0	1	1	1	0	0	0	1	0	5	5	5	5	5	5	5	5	4	3	2	3	1	4	4	1	4	1
1918	AU_GR_1918	1	1	29	19	2	5	7	3	1	3	3	1	0	1	0	1	1	1	0	0	0	1	0	5	2	4	2	5	1	4	1	5	5	5	4	2	3	4	4	5	5
1920	AU_GR_1920	1	1	29	19	2	5	6	3	1	3	3	0	0	1	0	1	0	1	0	0	0	1	0	5	4	4	5	5	4	5	4	5	2	3	4	3	5	2	2	4	1
1921	AU_GR_1921	1	1	29	19	1	5	6	5	1	3	3	1	1	1	1	1	1	1	1	1	0	0	0	5	2	5	3	5	2	5	1	5	4	5	5	3	5	5	5	4	3
1922	AU_GR_1922	1	1	29	21	1	5	5	5	1	3	3	0	1	0	99	0	0	1	1	0	0	0	1	4	5	4	4	4	1	5	2	1	1	1	1	1	1	1	1	1	1
1923	AU_GR_1923	1	1	29	19	2	5	7	5	1	11	11	1	0	1	0	1	1	1	1	0	0	1	0	5	5	5	1	5	4	5	5	1	1	1	1	1	1	1	1	1	1
1925	AU_GR_1925	1	1	29	19	1	5	7	5	1	3	3	1	1	1	0	1	1	1	1	0	0	1	0	5	5	5	5	5	5	5	5	1	1	1	2	2	2	2	1	2	1
1926	AU_GR_1926	1	1	29	18	2	5	7	3	1	3	3	0	0	0	1	0	0	0	0	0	0	1	0	5	5	5	5	5	4	5	4	5	5	3	5	2	5	1	2	5	5
1928	IT_UR_1928	13	2	30	19	2	1	3	5	1	3	3	0	0	0	0	0	0	1	0	0	0	0	1	5	4	5	5	5	4	5	1	3	2	3	2	1	5	1	1	4	1
1929	IT_UR_1929	13	2	30	18	2	4	4	3	1	3	3	0	0	0	0	0	0	1	1	0	1	1	0	5	4	5	1	5	3	5	2	4	4	2	4	2	5	2	2	5	2
1930	IT_UR_1930	13	2	30	19	2	1	4	3	2	3	3	0	0	0	1	0	0	0	0	0	1	1	0	5	3	4	4	3	4	4	3	5	4	4	4	2	5	3	3	4	3
1931	IT_UR_1931	13	2	30	19	2	4	2	4	1	3	3	0	0	0	0	0	0	0	0	0	0	1	0	4	3	5	5	4	3	5	3	4	4	5	4	99	99	99	99	4	99
1932	IT_UR_1932	13	2	30	19	2	4	3	3	1	11	11	0	0	1	0	0	0	0	0	0	0	1	1	5	5	4	5	5	4	5	1	3	2	2	1	1	4	2	1	99	99
1933	IT_UR_1933	13	2	30	19	2	4	4	4	1	3	3	1	0	1	0	1	0	1	1	0	0	1	0	5	1	4	4	4	4	5	2	5	5	5	5	4	5	5	5	5	5
1935	IT_UR_1935	13	2	30	19	2	5	4	5	1	3	3	0	0	0	0	1	0	1	1	0	0	1	0	5	4	4	4	4	5	5	4	5	5	5	4	4	5	5	5	5	4
1936	IT_UR_1936	13	2	30	19	2	4	4	4	1	3	3	1	0	1	0	1	0	1	1	0	0	1	0	5	1	4	3	4	3	4	1	4	4	4	4	3	4	4	5	5	3
1937	IT_UR_1937	13	2	30	19	2	1	3	3	1	3	3	1	0	1	0	0	0	1	1	0	0	1	0	4	4	4	2	3	3	4	3	5	5	5	5	4	5	5	5	5	5
1938	IT_UR_1938	13	2	30	19	2	1	4	5	1	3	3	1	0	0	0	1	1	1	1	0	0	1	0	5	4	5	5	5	3	5	5	1	1	1	1	1	1	1	1	1	1
1939	IT_UR_1939	13	2	30	19	2	4	6	5	2	3	3	1	0	0	0	1	1	1	0	0	0	1	0	5	3	5	3	5	2	4	4	1	1	1	2	1	2	2	1	1	1
1940	IT_UR_1940	13	2	30	19	2	4	4	4	3	3	3	1	0	1	0	1	0	1	0	0	0	0	0	5	3	4	4	5	4	4	4	4	4	4	4	3	4	4	3	4	4
1941	IT_UR_1941	13	2	30	19	2	4	5	4	1	3	3	0	1	0	0	0	0	1	1	0	0	1	0	4	4	4	4	5	3	4	4	5	5	4	5	3	3	1	4	4	4
1942	IT_UR_1942	13	2	30	19	2	2	5	4	3	3	3	1	0	1	0	1	1	1	1	0	0	1	0	4	4	4	4	4	4	4	5	4	5	4	5	4	4	4	5	4	4
1943	IT_UR_1943	13	2	30	18	2	4	3	5	1	3	3	1	0	1	0	1	1	1	1	0	0	1	0	4	5	5	5	5	3	5	2	4	4	3	4	2	3	1	1	3	1
1944	IT_UR_1944	13	2	30	19	2	5	5	5	1	3	3	1	0	1	1	1	1	1	0	0	0	1	0	4	3	4	5	5	4	5	3	4	4	4	4	3	5	3	5	5	3
1945	IT_UR_1945	13	2	30	19	2	5	5	3	1	3	3	1	0	0	0	1	0	1	1	0	0	1	1	4	3	4	3	5	3	4	4	4	1	2	3	2	1	3	1	4	2
1946	IT_UR_1946	13	2	30	19	2	4	3	3	1	3	3	0	0	0	0	0	0	1	0	0	99	1	0	4	4	3	4	4	4	5	3	5	4	5	5	2	3	3	3	4	2
1947	IT_UR_1947	13	2	30	19	2	4	2	3	1	3	3	0	0	0	0	0	0	1	1	0	0	0	0	4	2	4	5	5	4	5	4	5	5	5	4	2	5	2	2	5	2
1948	IT_UR_1948	13	2	30	19	2	5	4	3	1	3	3	0	0	0	0	0	0	1	1	0	0	1	0	4	3	4	3	4	4	4	4	5	4	4	5	3	3	4	2	2	2
1949	IT_UR_1949	13	2	30	19	2	5	4	3	1	3	3	0	0	0	0	0	0	1	1	0	0	0	0	2	4	5	3	5	5	5	4	3	4	4	3	2	1	2	1	1	1
1950	IT_UR_1950	13	2	30	19	2	5	4	3	2	3	3	0	1	0	0	0	0	1	1	0	0	1	0	3	4	3	2	3	4	3	2	4	5	5	5	3	3	4	3	5	4
1951	IT_UR_1951	13	2	30	19	2	4	3	5	1	3	3	1	0	0	0	1	1	1	1	0	0	0	1	4	4	4	4	4	2	4	5	5	5	4	5	4	4	4	5	4	4
1952	IT_UR_1952	13	2	30	19	2	1	3	4	1	3	3	1	0	1	0	1	0	1	1	0	0	1	0	4	4	5	3	4	3	4	4	4	4	4	3	2	3	2	3	4	2
1953	IT_UR_1953	13	2	30	19	2	5	99	4	1	3	3	0	0	0	0	0	0	1	1	0	0	1	0	4	2	4	4	4	3	5	5	5	4	4	5	4	2	3	3	2	4
1954	IT_UR_1954	13	2	30	19	2	5	6	5	1	3	3	0	0	0	1	0	0	1	1	0	0	1	1	5	3	5	4	4	3	5	5	4	4	3	4	2	3	1	2	3	2
1955	IT_UR_1955	13	2	30	19	2	3	99	3	1	13	12	1	0	1	0	1	1	1	0	1	0	0	0	2	4	4	4	5	3	5	3	3	3	3	2	2	4	2	1	4	1
1956	IT_UR_1956	13	2	30	18	2	5	5	5	1	3	3	1	0	1	0	1	1	0	0	0	0	1	1	5	4	5	4	4	1	4	4	5	5	5	4	3	3	4	3	5	3
1957	IT_UR_1957	13	2	30	19	2	5	99	4	3	13	12	0	0	0	0	0	0	1	0	0	0	1	0	5	2	4	4	5	3	5	5	1	1	1	1	1	1	1	1	1	1
1958	IT_UR_1958	13	2	30	19	2	3	2	3	1	11	11	0	0	0	0	0	0	0	0	0	0	0	0	4	3	5	2	5	1	5	3	1	1	1	1	1	1	1	1	1	1
1959	IT_UR_1959	13	2	30	99	2	5	5	4	1	3	3	0	0	0	0	0	0	1	0	0	0	1	1	5	5	5	5	5	5	5	3	2	3	2	2	1	1	4	2	2	3
1960	IT_UR_1960	13	2	30	19	2	1	99	4	1	3	3	1	0	0	0	1	1	1	1	0	0	0	1	4	4	4	99	1	4	4	5	1	2	2	1	1	1	3	1	1	1
1961	IT_UR_1961	13	2	30	19	2	5	3	3	1	3	3	0	0	0	0	0	0	0	0	0	0	99	0	5	4	5	4	5	4	5	3	3	3	3	2	2	3	3	99	3	3
1962	IT_UR_1962	13	2	30	18	2	5	5	5	1	3	3	0	0	0	0	0	0	0	0	0	0	1	1	5	3	5	99	5	5	5	3	4	4	4	3	1	3	4	3	5	2
1963	IT_UR_1963	13	2	30	19	2	5	6	5	1	3	3	0	0	0	0	0	0	0	0	0	0	1	1	5	4	4	4	4	3	4	2	4	4	4	4	1	4	3	4	4	4
1964	IT_UR_1964	13	2	30	19	2	5	5	5	1	3	3	1	0	0	0	1	1	0	0	0	0	0	1	3	4	4	4	4	2	4	4	4	3	4	4	2	4	3	2	4	2
1965	IT_UR_1965	13	2	30	18	2	5	5	5	1	3	3	1	0	0	0	1	1	0	0	0	0	0	1	3	2	4	4	4	3	4	3	4	4	3	5	4	4	5	4	4	4
1966	IT_CA_1966	13	1	31	19	1	1	99	5	3	3	3	0	0	0	0	0	0	1	1	0	0	1	0	5	4	4	5	4	2	5	4	4	3	5	4	4	4	4	4	5	4
1967	IT_CA_1967	13	1	31	99	1	4	5	5	1	3	3	0	0	0	0	1	0	1	0	0	0	1	99	5	4	5	4	4	3	4	3	5	5	4	5	5	5	4	5	5	99
1968	IT_CA_1968	13	1	31	19	1	5	7	5	2	3	3	1	0	1	0	1	1	1	1	0	0	0	1	5	5	5	5	5	5	5	5	1	1	2	1	1	1	1	1	1	1
1969	IT_CA_1969	13	1	31	20	2	4	6	5	1	13	12	1	0	1	0	0	1	1	1	0	0	1	1	5	2	5	2	5	1	4	2	3	3	3	2	2	2	2	2	3	1
1970	IT_CA_1970	13	1	31	19	2	4	6	4	1	11	11	1	0	1	1	1	1	1	0	0	0	1	0	4	5	4	4	5	4	4	4	2	2	1	1	1	2	1	1	2	1
1971	IT_CA_1971	13	1	31	19	1	4	5	4	1	3	3	0	0	0	0	1	0	1	1	0	0	0	0	5	4	5	4	5	3	5	3	5	5	4	4	4	5	4	5	5	3
1972	IT_CA_1972	13	1	31	21	1	5	99	5	1	11	11	0	0	1	0	1	1	1	1	0	0	0	0	5	5	5	5	5	5	5	5	1	1	1	1	1	1	1	1	1	1
1973	IT_CA_1973	13	1	31	18	1	3	99	5	1	3	3	0	0	0	0	0	0	0	0	99	0	1	1	5	4	4	4	4	5	4	3	4	3	2	4	2	3	3	2	5	4
1974	IT_CA_1974	13	1	31	19	2	5	99	4	3	3	3	0	1	0	0	0	0	1	0	0	0	0	0	3	2	5	4	5	2	4	3	3	3	3	3	1	3	1	3	3	3
1976	IT_CA_1976	13	1	31	19	1	5	99	3	1	3	3	1	0	1	0	1	1	1	1	1	1	1	0	5	5	5	5	5	5	5	5	4	4	3	3	3	3	3	3	3	3
1977	IT_CA_1977	13	1	31	20	1	5	5	5	1	13	12	0	0	1	0	1	0	1	1	0	0	1	1	4	4	4	4	4	4	4	5	2	4	4	1	2	1	1	3	1	1
1978	IT_CA_1978	13	1	31	18	2	5	99	5	1	3	3	1	1	1	0	1	1	1	1	0	0	0	1	5	3	5	4	4	4	5	3	2	1	2	2	1	2	1	1	2	1
1979	IT_CA_1979	13	1	31	20	1	1	5	5	1	11	11	0	0	0	0	1	0	1	1	0	0	1	1	5	5	5	4	5	4	5	5	1	1	1	1	1	1	1	1	1	1
1980	IT_CA_1980	13	1	32	20	2	5	7	5	1	3	3	0	0	0	0	1	0	1	1	0	0	1	0	5	4	5	4	5	2	5	4	5	5	4	5	3	5	4	5	4	3
1982	IT_CA_1982	13	1	32	18	1	5	7	5	1	11	11	1	0	1	0	0	1	1	0	0	0	0	1	4	4	5	5	5	5	5	3	1	2	2	1	1	1	1	1	1	1
1983	IT_CA_1983	13	1	32	19	1	3	5	5	1	3	3	0	0	0	0	0	0	1	1	0	0	1	1	5	4	4	4	5	4	4	3	1	1	1	1	1	1	1	1	1	1
1984	IT_CA_1984	13	1	32	18	2	3	6	5	1	3	3	99	0	0	0	0	99	1	1	0	0	1	0	5	4	5	5	5	5	5	4	4	3	4	3	1	4	2	2	4	2
1985	IT_CA_1985	13	1	32	19	2	2	6	5	1	99	99	0	1	1	1	1	1	1	1	0	0	0	0	4	5	5	4	5	5	5	5	1	1	1	1	1	1	1	1	1	1
1986	IT_CA_1986	13	1	32	19	1	3	4	3	1	3	3	1	0	0	0	0	1	1	0	0	0	1	1	5	5	4	2	5	3	4	3	3	4	1	1	2	1	1	1	1	1
1988	IT_CA_1988	13	1	32	19	2	3	7	4	1	3	3	1	0	0	0	1	0	1	0	0	0	1	0	5	5	5	5	5	2	5	5	2	2	1	2	1	3	1	1	1	1
1989	IT_CA_1989	13	1	32	19	2	5	5	5	1	3	3	0	0	0	0	0	0	0	0	0	0	99	99	99	99	99	99	99	99	99	99	99	99	99	99	99	99	99	99	99	99
1990	IT_CA_1990	13	1	32	19	1	2	99	4	1	3	3	0	0	0	0	0	0	1	0	0	0	1	1	5	2	3	2	5	3	2	1	4	4	5	3	4	5	3	4	5	3
1991	IT_CA_1991	13	1	32	18	2	4	99	4	2	11	11	1	0	0	0	0	0	1	0	0	0	0	0	99	99	99	99	99	99	99	99	99	99	99	99	99	99	99	99	99	99
1992	IT_CA_1992	13	1	32	19	2	5	7	5	1	99	99	0	0	1	0	1	0	1	1	0	0	1	99	99	99	99	99	99	99	99	99	2	2	1	3	1	1	2	1	1	1
1993	IT_CA_1993	13	1	32	19	2	5	7	5	1	11	11	1	0	1	1	1	1	1	1	0	1	1	0	5	5	5	5	5	5	5	5	2	2	1	2	1	2	2	2	2	1
1994	IT_CA_1994	13	1	32	19	2	5	6	4	1	11	11	0	0	0	1	0	0	1	1	0	0	1	0	5	3	4	4	4	2	4	4	1	1	1	3	1	1	1	1	2	1
1995	IT_CA_1995	13	1	32	19	2	4	6	5	1	3	3	1	0	99	0	1	1	99	99	1	99	0	99	99	99	99	99	99	99	99	99	99	99	99	99	99	99	99	99	99	99
1997	IT_CA_1997	13	1	32	19	2	5	6	4	1	2	2	0	0	0	0	0	0	1	0	0	0	0	0	4	4	5	4	5	5	4	3	3	4	4	2	3	3	1	3	2	1
1999	IT_CA_1999	13	1	32	19	1	5	6	5	1	11	11	1	0	0	0	0	1	99	99	0	1	0	1	4	4	3	3	3	4	3	5	3	3	3	3	2	2	2	2	2	2
2000	IT_CA_2000	13	1	32	20	2	5	4	5	1	11	11	1	0	0	0	0	1	1	0	0	1	0	1	4	4	3	2	3	4	4	3	3	3	3	3	2	2	2	2	2	2
2001	IT_CA_2001	13	1	32	19	1	5	6	5	1	4	4	1	0	1	1	1	1	1	0	0	1	1	0	5	5	5	5	5	1	5	3	1	2	1	1	1	1	1	1	1	1
2004	IT_CA_2004	13	1	32	19	2	4	6	5	1	3	3	0	0	0	0	0	0	1	0	0	1	1	0	5	5	5	5	5	5	5	1	5	5	3	3	3	3	3	5	1	1
2005	IT_CA_2005	13	1	32	19	2	4	6	4	1	3	3	1	0	1	1	1	1	1	1	0	0	1	0	4	5	5	5	5	5	5	5	3	3	2	2	2	2	1	2	3	2
2007	IT_CA_2007	13	1	32	18	2	5	7	5	1	11	11	1	0	1	0	1	1	1	1	0	0	1	0	5	5	5	5	5	5	5	5	1	1	1	1	1	1	1	1	1	1
2009	IT_CA_2009	13	1	32	19	2	4	6	4	3	3	3	0	0	0	0	0	0	1	0	0	0	0	0	3	3	4	4	3	4	3	3	4	4	4	4	3	3	3	3	3	3
2010	IT_CA_2010	13	1	32	99	3	4	6	5	1	11	11	0	0	0	0	0	0	1	0	99	0	0	1	5	5	4	4	4	5	5	2	5	5	5	1	4	3	3	3	3	3
2011	IT_CA_2011	13	1	32	19	2	5	7	5	1	3	3	1	0	0	1	0	0	1	0	0	0	1	0	5	4	4	5	5	5	5	5	5	5	2	2	2	5	1	2	2	1
2012	IT_CA_2012	13	1	32	19	2	5	7	5	1	3	3	1	0	1	0	1	1	1	1	1	0	0	0	5	4	5	5	5	4	3	5	5	4	3	5	1	5	4	3	5	5
2013	IT_CA_2013	13	1	32	18	2	5	7	5	1	11	11	1	0	1	0	1	1	1	1	1	0	0	0	5	2	5	5	5	1	5	4	1	1	1	2	1	3	1	1	1	1
2014	IT_CA_2014	13	1	32	19	2	4	6	5	1	3	3	0	0	1	0	1	1	1	1	0	0	1	0	5	3	5	2	5	3	5	3	1	1	1	2	1	1	1	1	1	1
2015	IT_CA_2015	13	1	32	20	1	5	4	5	1	3	3	0	0	1	1	1	0	1	0	0	0	0	0	1	1	4	3	5	2	5	2	4	4	3	5	4	3	5	3	4	2
2016	IT_CA_2016	13	1	32	19	2	5	6	5	1	3	3	1	0	0	0	1	1	1	1	0	0	0	0	5	4	4	5	5	3	5	5	4	4	1	1	1	4	3	2	2	1
2017	IT_CA_2017	13	1	32	18	2	3	7	5	1	3	3	1	0	0	0	0	0	1	0	0	0	1	0	99	99	99	99	99	99	99	99	99	99	99	99	99	99	99	99	99	99
2018	IT_CA_2018	13	1	32	19	2	3	6	5	1	3	3	0	0	0	0	0	0	1	1	0	0	0	0	5	4	5	4	5	4	5	5	5	5	4	4	2	4	4	4	5	4
2019	IT_CA_2019	13	1	32	18	2	2	6	5	1	3	3	0	0	0	0	1	1	1	1	1	1	1	0	5	5	5	1	5	3	5	2	5	4	3	99	3	5	4	3	5	3
2020	IT_CA_2020	13	1	32	18	2	3	7	5	1	11	11	0	0	0	0	0	0	1	0	0	0	1	0	5	5	5	5	5	4	5	5	1	1	1	2	1	1	1	1	1	1
2022	IT_CA_2022	13	1	32	19	2	5	7	4	1	11	11	0	0	1	1	1	0	1	1	0	0	1	0	5	4	5	4	5	1	5	3	3	2	1	4	1	1	1	1	1	1
2023	IT_CA_2023	13	1	32	19	2	2	5	5	1	99	99	1	0	0	0	1	1	1	1	0	0	0	1	5	3	4	1	3	4	5	2	3	3	3	4	3	4	3	3	3	3
2024	IT_CA_2024	13	1	32	19	2	2	4	5	1	99	99	1	0	1	0	0	1	1	1	0	0	0	1	5	3	4	1	3	4	5	2	3	3	3	4	3	4	3	3	3	3
2025	IT_CA_2025	13	1	32	19	2	3	6	5	1	3	3	99	0	1	0	1	1	0	0	0	0	1	1	5	4	5	4	5	3	5	2	5	5	5	4	5	5	3	4	5	5
2026	IT_CA_2026	13	1	32	18	2	3	7	4	1	3	3	1	0	1	0	1	1	1	1	0	0	1	0	5	2	5	5	2	1	5	2	3	3	1	1	1	1	1	1	1	1
2027	IT_CA_2027	13	1	32	19	1	5	6	4	1	3	3	0	0	0	0	0	0	1	1	0	0	1	0	5	4	4	5	4	4	5	4	5	5	3	4	2	5	3	1	5	4
2028	RO_BU_2028	19	2	33	20	2	4	4	5	1	4	4	0	0	0	1	0	0	1	1	0	0	0	0	5	5	5	3	4	3	5	5	5	5	5	5	4	5	4	5	5	5
2029	RO_BU_2029	19	2	33	19	1	5	6	3	1	99	99	0	0	0	0	0	1	0	0	99	0	0	1	1	2	3	2	5	3	2	2	5	4	4	5	5	3	5	4	5	4
2030	RO_BU_2030	19	2	33	20	2	4	99	4	3	4	4	0	0	0	0	0	0	0	0	0	0	1	99	5	1	3	5	4	3	5	3	2	1	1	1	1	1	1	1	1	1
2031	RO_BU_2031	19	2	33	19	99	4	1	4	1	4	4	0	0	0	0	0	1	0	0	0	0	0	0	4	4	4	2	4	3	4	2	4	3	5	3	5	3	4	4	4	4
2032	RO_BU_2032	19	2	33	19	1	4	4	4	1	4	4	0	99	0	0	0	1	1	0	99	99	0	1	99	99	3	2	2	4	3	2	5	5	5	5	4	5	5	4	3	5
2033	RO_BU_2033	19	2	33	20	2	5	99	99	99	4	4	0	0	0	0	0	1	0	0	99	99	99	0	99	3	1	99	99	4	2	1	5	99	99	4	2	99	3	99	1	99
2034	RO_BU_2034	19	2	33	20	2	5	1	2	1	4	4	0	0	0	0	0	0	0	0	99	0	99	0	99	99	99	99	99	99	99	99	99	99	99	99	99	99	99	99	99	99
2035	RO_BU_2035	19	2	33	19	99	5	5	5	1	4	4	0	0	0	0	0	0	1	1	0	0	0	0	5	5	5	2	5	3	4	3	5	5	4	5	4	5	4	3	3	3
2036	RO_BU_2036	19	2	33	20	1	3	7	5	1	11	11	0	0	1	0	0	0	1	1	0	0	0	99	99	99	99	99	99	99	99	99	99	99	99	99	99	99	99	99	99	99
2037	RO_BU_2037	19	2	33	18	99	4	4	3	2	4	4	0	0	0	0	0	1	1	1	0	0	0	0	4	4	4	5	5	4	5	2	5	5	4	4	3	3	4	4	2	3
2038	RO_BU_2038	19	2	33	20	2	4	4	5	1	4	4	0	0	0	0	0	0	1	0	0	1	0	0	5	5	5	2	5	5	5	3	5	5	5	5	5	5	5	5	5	5
2039	RO_BU_2039	19	2	33	19	2	4	99	3	1	4	4	0	0	0	0	0	0	0	1	0	99	0	0	5	5	4	5	5	5	5	3	5	5	5	5	4	3	5	5	3	5
2040	RO_BU_2040	19	2	33	20	2	4	4	4	1	4	4	0	0	0	0	1	0	1	1	0	0	1	0	4	5	4	1	5	5	5	1	5	5	5	5	5	5	2	4	2	3
2041	RO_BU_2041	19	2	33	18	2	4	4	4	1	4	4	1	0	1	0	0	1	1	1	0	0	0	0	4	4	4	2	4	3	4	2	5	5	5	4	4	4	4	4	4	4
2042	RO_BU_2042	19	2	33	19	2	5	99	4	1	4	4	0	0	0	0	1	1	1	0	0	0	0	0	4	4	4	5	5	4	5	5	3	3	3	3	3	3	3	3	3	3
2043	RO_BU_2043	19	2	33	19	2	4	2	3	3	4	4	1	0	0	0	0	0	1	1	0	0	0	1	5	5	3	2	4	5	5	3	5	5	4	4	2	3	4	4	5	5
2044	RO_BU_2044	19	2	33	19	2	4	1	3	2	4	4	0	0	0	0	0	0	1	1	0	0	1	0	4	3	4	4	5	5	4	3	5	5	5	5	4	5	4	4	4	4
2045	RO_BU_2045	19	2	33	20	2	4	99	4	3	4	4	0	0	0	0	0	0	1	1	0	0	0	0	4	5	4	4	5	4	4	2	4	4	3	2	1	3	3	3	1	1
2046	RO_BU_2046	19	2	33	19	2	5	5	5	1	4	4	0	0	0	0	0	0	1	0	0	1	1	0	4	4	3	3	2	4	3	3	5	5	4	2	2	3	2	3	1	2
2047	RO_BU_2047	19	2	33	19	2	5	4	4	1	4	4	99	99	1	0	0	0	0	1	0	0	99	1	5	4	5	3	2	4	1	2	5	5	3	4	3	99	3	3	5	1
2048	RO_BU_2048	19	2	33	19	1	5	5	4	1	4	4	0	0	0	1	0	0	0	0	1	0	0	0	4	4	99	2	5	4	4	2	5	5	5	4	4	4	4	4	4	4
2050	RO_BU_2050	19	2	33	19	2	5	4	3	1	4	4	1	0	0	0	0	0	0	0	0	0	1	1	5	4	5	3	5	4	4	3	5	5	5	5	5	5	5	5	5	5
2051	RO_BU_2051	19	2	33	20	2	5	4	3	1	4	4	0	0	0	0	0	0	0	0	0	0	0	0	5	4	5	3	5	5	5	3	5	5	5	5	4	5	5	5	5	5
2052	RO_BU_2052	19	2	33	19	2	4	4	4	1	4	4	0	0	0	0	0	0	1	1	0	0	0	0	5	5	4	3	5	4	5	4	5	4	4	5	3	3	3	3	4	3
2053	RO_BU_2053	19	2	33	20	2	3	5	4	2	2	2	1	0	0	0	0	0	0	0	0	0	0	0	99	99	99	99	99	99	99	99	99	99	99	99	99	99	99	99	99	99
2054	RO_BU_2054	19	2	33	18	2	2	4	4	1	4	4	1	0	0	1	0	0	0	0	0	0	1	1	5	5	5	5	5	5	2	5	5	5	5	5	5	5	3	4	4	5
2055	RO_BU_2055	19	2	33	19	2	4	4	3	1	4	4	0	0	0	0	0	0	1	1	0	0	0	99	99	99	99	99	99	99	99	99	99	99	99	99	99	99	99	99	99	99
2056	RO_BU_2056	19	2	33	20	2	4	5	2	2	4	4	0	0	0	0	0	0	1	1	0	0	1	1	5	5	5	3	5	5	5	1	5	5	5	5	1	5	5	5	3	5
2057	RO_BU_2057	19	2	33	20	99	5	7	4	1	4	4	0	0	0	0	0	0	0	0	99	0	0	1	5	5	5	3	1	5	5	5	5	5	5	3	1	4	5	3	1	1
2058	RO_BU_2058	19	2	33	19	2	3	4	4	2	4	4	0	0	0	0	1	0	0	0	99	0	0	1	5	5	5	3	1	5	5	5	5	5	5	3	1	4	5	3	1	1
2059	RO_BU_2059	19	2	33	19	2	4	2	2	1	99	99	0	0	99	0	0	0	0	0	99	0	0	0	3	3	3	3	3	3	3	3	4	4	2	5	3	3	3	3	1	2
2060	RO_BU_2060	19	2	33	20	1	5	4	4	1	4	4	0	0	0	0	0	0	99	0	99	0	0	1	4	3	4	4	4	4	4	1	5	4	4	4	2	1	2	2	1	1
2061	RO_BU_2061	19	2	33	19	99	5	4	5	1	4	4	0	0	0	0	0	0	0	0	99	0	1	1	99	99	99	99	99	99	99	99	99	99	99	99	99	99	99	99	99	99
2062	RO_BU_2062	19	2	33	19	2	5	99	4	1	4	4	0	0	0	1	0	0	1	0	0	1	1	0	5	3	4	3	5	4	5	3	5	5	3	3	3	5	3	5	5	3
2063	RO_BU_2063	19	2	33	20	1	5	99	4	1	4	4	0	0	0	0	0	0	1	0	0	0	0	1	3	3	4	4	4	3	4	1	5	5	5	4	5	5	5	4	4	5
2064	RO_BU_2064	19	2	33	19	2	4	3	3	1	4	4	0	0	0	1	0	0	1	1	0	0	0	0	5	5	5	1	5	5	5	5	5	5	5	4	1	5	4	5	3	1
2065	RO_BU_2065	19	2	33	19	99	5	4	5	1	4	4	0	0	0	0	0	0	1	1	0	0	1	1	2	3	99	4	3	2	3	5	3	4	2	4	2	4	3	2	4	2
2066	RO_BU_2066	19	2	33	19	99	5	6	4	1	2	2	0	0	0	0	0	0	0	0	0	0	0	0	2	3	5	2	2	5	3	5	5	5	5	4	3	2	5	4	3	2
2067	RO_BU_2067	19	2	33	19	99	5	3	3	2	2	2	0	0	0	1	0	0	0	0	99	0	0	0	4	4	3	2	4	5	4	3	5	5	5	2	2	2	4	4	4	4
2068	RO_BU_2068	19	2	33	18	2	4	99	3	2	4	4	0	0	0	0	0	0	1	0	99	0	1	0	5	3	4	3	3	3	4	3	5	5	5	5	5	5	5	5	3	5
2069	RO_BU_2069	19	2	33	20	2	4	99	3	2	4	4	0	0	0	0	0	0	1	1	0	0	0	0	5	3	4	3	3	3	3	3	3	3	3	1	1	1	2	3	1	1
2070	RO_BU_2070	19	2	33	19	1	5	4	4	1	4	4	0	0	0	1	0	0	0	0	0	0	0	0	3	3	99	2	5	3	4	2	5	3	3	3	3	99	4	3	3	3
2071	RO_BU_2071	19	2	33	20	2	4	5	2	2	4	4	0	0	0	0	1	1	0	0	0	0	1	0	5	5	5	3	5	4	5	4	4	3	2	2	1	3	4	2	1	1
2072	RO_BU_2072	19	2	33	21	2	5	4	3	1	4	4	1	0	1	0	1	0	0	0	0	0	0	0	5	4	3	5	5	1	5	3	3	3	2	2	1	2	1	1	1	1
2073	RO_BU_2073	19	2	33	20	2	4	4	4	1	4	4	0	0	0	0	0	0	0	0	0	0	0	0	5	4	4	3	4	3	5	5	99	99	99	99	99	99	99	99	99	99
2074	RO_BU_2074	19	2	33	18	2	5	4	4	3	4	4	0	99	99	99	99	99	99	99	99	99	99	99	5	5	4	4	4	4	4	2	5	4	5	4	4	4	5	4	3	3
2075	RO_BU_2075	19	2	33	20	2	5	4	4	1	4	4	1	0	1	0	0	0	1	1	0	0	1	0	5	5	3	5	5	5	5	5	5	5	5	5	4	4	4	5	3	4
2076	RO_BU_2076	19	2	33	20	2	5	4	4	2	1	1	1	1	0	0	0	1	0	0	0	0	0	0	4	2	5	3	5	4	5	3	5	5	5	3	5	5	5	5	5	5
2077	RO_BU_2077	19	2	33	18	2	4	2	3	1	4	4	0	0	0	0	0	0	0	0	99	0	0	0	5	3	2	2	4	2	4	3	5	3	4	3	4	2	4	2	4	2
2078	RO_BU_2078	19	2	33	18	1	4	7	5	1	4	4	0	0	0	0	1	0	0	0	0	0	0	1	5	5	5	5	5	5	5	5	5	5	5	3	1	4	5	3	1	1
2079	RO_BU_2079	19	2	33	19	2	2	99	4	1	4	4	0	0	0	0	0	0	1	1	0	0	0	0	5	5	5	2	5	4	5	2	5	5	5	4	3	5	5	5	3	5
2082	RO_BU_2082	19	2	33	19	2	5	4	2	3	4	4	0	0	0	0	0	0	0	0	0	1	0	0	3	3	3	3	4	4	4	4	2	2	3	3	4	3	3	3	4	3
2083	RO_BU_2083	19	2	33	19	1	5	7	5	1	4	4	1	0	1	0	0	0	1	1	0	0	1	0	5	4	5	1	5	4	5	1	5	5	5	5	4	5	5	5	5	4
2084	RO_BU_2084	19	2	33	19	2	4	5	3	1	4	4	1	0	0	0	0	0	0	0	0	0	0	0	5	5	5	5	5	5	5	5	5	5	5	5	5	5	5	5	5	5
2085	RO_BU_2085	19	2	33	19	2	4	4	3	3	4	4	0	0	0	1	0	0	1	1	0	0	0	0	4	5	3	1	2	4	5	3	4	4	3	4	1	3	5	3	3	1
2086	RO_BU_2086	19	2	33	20	2	5	4	3	1	4	4	99	0	0	0	0	1	1	1	0	0	0	0	4	5	3	4	3	1	4	4	4	2	1	4	2	1	4	3	4	2
2087	RO_BU_2087	19	2	33	19	2	4	4	5	1	4	4	99	0	0	1	0	1	0	0	0	0	0	99	4	2	4	3	3	2	2	4	3	4	99	2	2	4	2	5	2	2
2088	RO_BU_2088	19	2	33	19	2	5	7	4	1	4	4	99	0	0	0	1	0	0	0	99	0	0	0	5	5	5	5	5	5	5	99	5	5	5	3	1	4	5	3	1	1
2089	RO_BU_2089	19	2	33	19	2	4	5	5	1	4	4	0	0	0	0	0	0	0	99	0	0	0	99	5	1	4	3	5	2	4	4	4	4	3	3	4	3	2	4	5	3
2090	RO_BU_2090	19	2	33	19	2	4	3	5	1	4	4	0	0	0	0	0	0	0	99	0	0	0	0	3	4	2	2	3	4	2	3	1	4	99	1	1	3	3	2	1	1
2091	RO_BU_2091	19	2	33	19	1	5	6	4	2	6	5	0	0	0	0	0	0	0	0	1	0	0	0	4	4	3	2	5	4	5	2	5	5	5	5	5	5	5	5	5	5
2092	RO_BU_2092	19	2	33	18	2	5	5	4	1	4	4	0	0	99	0	0	1	0	1	0	0	0	0	5	5	5	1	4	4	4	1	5	5	4	4	5	5	5	5	4	5
2093	RO_BU_2093	19	2	33	19	2	4	3	5	1	4	4	1	0	0	0	0	0	1	1	0	0	1	0	4	4	4	2	4	4	4	2	5	5	5	5	4	4	4	4	4	4
2094	RO_BU_2094	19	2	33	20	2	4	3	4	1	4	4	0	0	0	0	0	0	0	0	0	0	0	0	4	3	4	4	5	4	4	4	4	4	3	2	2	3	3	3	3	2
2095	RO_BU_2095	19	2	33	19	99	4	4	2	1	4	4	0	0	0	0	0	0	1	1	0	0	0	0	3	2	5	2	2	3	5	4	5	5	5	5	5	5	5	5	3	5
2096	RO_BU_2096	19	2	33	18	99	5	4	5	1	1	1	0	0	0	1	0	1	1	1	0	0	0	0	5	3	4	3	4	2	5	4	5	5	5	5	5	5	5	5	5	5
2098	RO_BU_2098	19	2	33	20	2	5	4	4	1	4	4	1	0	0	0	1	0	1	1	99	1	99	0	5	5	3	3	5	5	5	5	99	99	99	99	99	99	99	99	99	99
2099	RO_BU_2099	19	2	33	20	2	5	4	3	1	99	99	0	0	0	0	0	0	0	0	0	0	0	99	99	99	99	99	99	99	99	99	99	99	99	99	99	99	99	99	99	99
2100	RO_BU_2100	19	2	33	20	1	5	4	4	2	4	4	0	99	99	1	0	0	0	0	99	0	0	0	5	3	3	2	4	4	2	3	5	5	5	5	5	5	5	5	5	5
2101	RO_BU_2101	19	2	33	19	99	5	4	3	3	4	4	0	0	0	0	0	0	0	1	99	0	0	0	3	3	4	3	4	3	2	4	5	5	5	5	5	4	5	4	3	3
2102	RO_BU_2102	19	2	33	20	2	5	4	3	2	4	4	0	0	0	0	1	0	0	0	0	0	0	99	3	3	3	3	3	3	3	3	3	3	4	3	3	3	2	2	3	3
2103	RO_BU_2103	19	2	33	19	2	5	99	3	1	4	4	1	0	0	0	0	1	0	0	0	1	0	0	4	3	5	1	5	3	3	3	5	5	5	4	5	5	99	5	5	5
2104	RO_BU_2104	19	2	33	19	2	5	6	5	1	4	4	0	0	0	0	0	0	0	0	0	99	0	99	99	99	99	99	99	99	99	99	99	99	99	99	99	99	99	99	99	99
2105	RO_BU_2105	19	2	33	19	1	2	7	4	2	4	4	0	0	0	0	1	0	0	0	0	0	0	1	5	4	4	1	5	1	5	3	1	1	1	1	1	1	1	1	1	1
2106	RO_BU_2106	19	2	33	19	2	4	4	4	1	4	4	0	0	0	1	0	0	0	0	0	0	0	0	5	4	3	3	3	3	99	2	99	99	99	99	99	99	99	99	99	99
2107	RO_BU_2107	19	2	33	19	1	4	4	4	1	4	4	0	0	0	0	0	0	0	0	0	0	0	0	5	5	4	3	4	3	99	4	5	5	4	99	4	5	4	4	4	4
2108	RO_BU_2108	19	2	33	19	2	5	6	5	1	4	4	0	0	1	0	0	0	1	0	0	0	0	1	5	5	5	2	5	5	5	1	5	5	5	5	4	5	5	4	4	4
2109	RO_BU_2109	19	2	33	19	2	5	5	5	1	4	4	0	0	0	0	0	1	1	1	0	0	1	99	99	99	99	99	99	99	99	99	99	99	99	99	99	99	99	99	99	99
2110	RO_BU_2110	19	2	33	19	99	5	6	5	1	4	4	0	0	0	0	0	0	1	1	99	1	0	0	5	5	5	5	5	3	5	3	3	4	4	3	3	3	3	3	3	3
2111	RO_BU_2111	19	2	33	18	1	5	99	5	1	4	4	0	0	1	0	1	0	0	0	99	0	0	99	4	2	4	4	4	2	4	4	4	4	2	2	4	2	4	2	4	2
2112	RO_BU_2112	19	2	33	20	2	4	1	3	1	4	4	0	0	0	0	0	0	0	0	99	0	0	1	5	5	4	99	4	3	3	2	5	5	5	5	5	5	5	5	5	5
2113	RO_BU_2113	19	2	33	18	1	4	3	2	2	4	4	1	0	0	0	0	0	0	0	0	0	0	0	4	3	2	3	3	4	4	3	5	3	5	2	3	5	3	2	99	3
2114	RO_BU_2114	19	2	33	19	2	4	99	4	1	4	4	0	0	0	0	0	0	1	1	99	0	0	0	5	5	5	2	5	4	5	1	5	5	5	5	5	5	5	5	5	5
2115	RO_BU_2115	19	2	33	19	99	4	1	2	3	4	4	0	0	0	0	0	0	0	0	99	0	0	0	5	4	1	2	4	3	1	1	99	99	99	99	99	99	99	99	99	99
2116	RO_BU_2116	19	2	33	19	2	4	4	4	1	4	4	0	0	0	0	0	0	0	0	99	0	0	1	5	5	4	3	4	4	3	2	5	5	5	5	5	5	5	5	5	5
2117	RO_BU_2117	19	2	33	19	2	3	5	3	1	4	4	0	0	0	0	0	0	0	1	0	1	0	99	5	4	3	2	5	5	4	2	5	5	5	4	5	5	4	5	3	5
2118	RO_BU_2118	19	2	33	19	2	4	2	3	1	4	4	0	0	0	0	0	0	1	0	0	0	0	99	4	5	2	2	3	3	4	4	5	5	5	5	4	5	4	4	4	5
2119	RO_BU_2119	19	2	33	20	2	5	5	5	1	4	4	0	0	0	0	0	0	1	0	0	0	0	0	5	4	4	5	4	4	5	2	3	3	3	3	3	3	3	3	3	3
2120	RO_BU_2120	19	2	33	19	2	5	4	5	1	4	4	0	0	0	0	0	0	1	1	0	0	0	0	4	4	4	2	4	3	3	3	5	5	5	5	5	5	5	5	5	5
2121	RO_BU_2121	19	2	33	20	2	5	7	5	1	4	4	0	0	0	0	0	0	1	0	99	0	1	0	3	5	5	5	3	5	4	5	2	2	1	3	2	3	2	2	3	3
2122	RO_BU_2122	19	2	33	20	2	5	5	4	1	4	4	1	99	1	0	0	0	1	0	0	1	1	0	99	99	99	99	99	99	99	99	5	5	5	5	99	5	99	99	99	99
2123	RO_BU_2123	19	2	33	20	2	4	1	3	1	4	4	0	0	0	0	0	0	0	0	99	0	0	1	5	5	4	3	4	4	3	2	5	5	5	5	5	5	5	5	5	5
2124	RO_BU_2124	19	2	33	19	1	4	4	4	1	4	4	0	0	0	1	0	0	1	0	99	0	0	0	3	5	5	5	3	5	4	5	2	2	1	3	2	3	1	1	2	2
2125	RO_BU_2125	19	2	33	19	2	4	4	4	1	4	4	99	0	0	0	0	0	1	1	0	0	1	0	99	99	99	99	99	99	99	99	99	99	99	99	99	99	99	99	99	99
2126	RO_BU_2126	19	2	33	20	2	5	4	3	1	4	4	0	0	1	0	0	0	0	0	0	1	0	0	5	5	4	4	5	3	5	1	5	4	5	4	3	5	2	5	5	5
2127	RO_BU_2127	19	2	33	19	1	5	5	5	1	4	4	0	0	0	0	0	1	0	0	0	0	1	0	5	5	5	3	3	3	3	3	5	5	4	4	1	3	3	4	3	3
2128	RO_BU_2128	19	2	33	20	2	4	3	2	3	4	4	0	0	1	1	0	0	1	1	0	0	1	0	5	4	5	2	5	3	5	3	5	5	5	5	4	5	4	4	4	5
2129	RO_BU_2129	19	2	33	20	2	4	4	3	2	4	4	0	0	0	1	0	0	1	1	0	0	1	0	5	5	5	2	4	5	4	2	4	4	4	4	4	4	4	4	3	3
2130	RO_BU_2130	19	2	33	19	2	5	4	4	1	4	4	0	0	0	0	1	0	0	0	0	0	0	99	4	4	4	2	4	3	4	3	5	3	4	3	2	3	1	1	3	1
2131	RO_BU_2131	19	2	33	20	1	4	1	2	3	4	4	0	0	1	0	0	0	1	1	0	0	1	0	5	5	3	4	3	3	5	1	99	99	99	99	99	99	99	99	99	99
2132	RO_BU_2132	19	2	33	20	1	5	4	3	1	4	4	0	0	1	0	1	0	0	0	0	0	0	1	5	4	5	5	5	4	5	5	3	3	2	3	1	1	1	1	1	1
2133	RO_BU_2133	19	2	33	19	2	4	99	4	1	4	4	0	0	0	0	0	0	0	1	0	1	0	1	5	5	5	3	5	5	5	1	5	5	5	5	5	5	5	5	5	5
2134	RO_BU_2134	19	2	33	19	2	4	3	4	3	12	12	0	0	0	1	0	0	1	1	0	0	1	0	5	5	5	1	5	1	5	3	3	3	3	2	1	3	2	1	1	1
2135	RO_BU_2135	19	2	33	19	99	5	99	5	1	4	4	0	0	0	1	0	0	0	0	1	0	99	99	99	99	99	99	99	99	99	99	5	1	5	5	4	3	5	5	3	4
2136	RO_BU_2136	19	2	33	19	99	4	3	3	2	4	4	0	0	0	0	0	0	1	0	0	0	99	0	5	4	5	3	5	3	5	3	5	4	3	3	1	5	4	2	3	1
2137	RO_BU_2137	19	2	33	21	99	5	4	2	1	4	4	1	0	0	0	0	0	0	0	0	0	0	0	5	4	3	2	3	2	1	4	5	4	3	4	3	4	3	4	3	3
2138	RO_BU_2138	19	2	33	19	1	3	3	5	1	4	4	0	0	0	0	0	0	1	0	0	0	0	0	5	5	5	3	5	4	4	3	5	5	4	3	1	4	2	2	3	1
2139	RO_BU_2139	19	2	33	19	1	4	99	3	1	4	4	0	0	0	0	0	0	0	0	0	0	0	1	5	5	4	1	4	5	5	5	4	4	4	3	2	3	4	4	3	4
2140	RO_BU_2140	19	2	33	19	2	5	2	3	2	3	3	0	1	0	1	0	0	0	0	99	1	1	0	5	3	4	1	4	3	5	2	99	99	99	99	99	99	99	99	99	99
2141	RO_BU_2141	19	2	33	20	2	3	4	3	1	4	4	0	1	0	0	0	0	1	1	0	0	0	0	5	4	5	2	5	4	5	2	5	5	5	5	4	5	5	5	5	5
2142	RO_BU_2142	19	2	33	19	2	5	99	4	1	99	99	0	0	0	0	0	0	0	1	0	0	1	0	5	4	5	3	2	5	2	5	5	5	4	4	5	5	4	3	5	4
2143	RO_BU_2143	19	2	33	19	2	5	4	3	2	99	99	0	0	1	0	0	0	0	0	0	0	0	99	3	4	3	4	4	4	3	2	4	3	5	1	4	3	4	3	2	3
2144	RO_BU_2144	19	2	33	19	2	3	5	4	1	4	4	0	0	0	0	0	0	0	0	99	0	1	0	4	3	3	3	4	3	3	3	3	3	3	2	2	2	2	99	2	2
2145	RO_BU_2145	19	2	33	19	2	5	1	3	1	99	99	99	0	0	0	0	0	1	0	0	0	0	0	99	99	99	99	99	99	99	99	99	99	99	99	99	99	99	99	99	99
2146	RO_BU_2146	19	2	33	19	1	5	6	4	1	4	4	1	0	0	0	0	0	1	1	0	0	0	0	5	4	1	4	4	3	2	3	5	5	5	3	4	5	4	4	4	4
2147	RO_BU_2147	19	2	33	19	2	5	4	2	2	4	4	0	99	0	0	0	0	99	0	99	99	99	0	4	3	4	3	4	5	2	3	5	5	5	5	5	5	5	4	3	4
2148	RO_BU_2148	19	2	33	19	2	4	4	4	1	4	4	0	0	0	1	0	0	0	0	0	0	1	0	4	3	4	1	4	3	4	1	5	4	4	4	4	4	3	2	2	4
2149	RO_BU_2149	19	2	33	19	1	4	4	3	1	4	4	1	0	0	0	0	0	1	1	0	0	0	1	4	5	4	3	3	3	3	3	3	3	2	2	2	3	2	2	2	1
2150	RO_BU_2150	19	2	33	19	2	5	4	3	3	4	4	0	0	0	0	0	0	99	0	0	0	99	0	99	99	99	99	99	99	99	99	99	99	99	99	99	99	99	99	99	99
2151	RO_BU_2151	19	2	33	20	2	5	4	5	1	4	4	0	0	0	1	0	1	0	0	0	0	0	0	5	5	4	2	4	5	4	1	5	5	5	5	2	3	5	4	1	1
2152	RO_BU_2152	19	2	33	20	2	5	4	4	1	3	3	0	0	0	0	0	0	1	0	0	0	0	0	4	3	4	1	3	3	4	3	5	5	5	5	5	5	5	5	5	5
2153	RO_BU_2153	19	2	33	18	2	4	2	3	1	4	4	99	0	0	0	0	0	0	0	0	0	0	1	5	5	4	3	4	4	5	3	5	5	4	4	4	4	3	2	2	2
2154	RO_BU_2154	19	2	33	19	99	5	4	5	1	4	4	0	0	0	0	0	0	1	1	0	0	1	0	3	3	3	99	1	5	99	4	5	5	5	5	5	5	5	5	5	5
2155	RO_BU_2155	19	2	33	19	2	4	4	3	1	4	4	0	0	0	0	1	0	1	0	0	0	1	1	5	4	4	4	4	2	4	4	5	5	4	4	4	3	4	3	4	3
2156	RO_BU_2156	19	2	33	19	1	3	3	4	2	4	4	99	0	0	0	0	0	1	1	0	0	1	0	5	5	4	3	4	4	5	3	5	2	3	4	1	1	1	1	1	1
2157	RO_BU_2157	19	2	33	18	2	5	1	4	3	4	4	0	0	0	0	0	0	1	1	99	1	0	0	5	4	3	4	1	2	4	1	3	3	4	5	2	1	2	3	4	5
2158	RO_BU_2158	19	2	33	19	2	5	99	4	1	4	4	0	0	0	99	99	0	1	1	99	99	99	99	99	99	99	99	99	99	99	99	99	99	99	99	99	99	99	99	99	99
2159	RO_BU_2159	19	2	33	19	2	4	3	5	1	4	4	0	0	0	0	0	0	1	0	0	0	0	1	5	3	4	5	5	5	5	2	3	5	4	1	1	3	5	5	1	1
2160	RO_BU_2160	19	2	33	19	2	99	1	5	1	4	4	0	0	0	0	0	0	1	0	99	0	0	99	5	99	4	1	3	99	2	1	99	99	99	99	99	99	99	99	99	99
2161	RO_BU_2161	19	2	33	19	2	5	99	4	1	4	4	0	0	0	0	1	0	1	1	0	0	0	0	5	5	3	4	5	4	5	4	5	5	5	4	5	5	5	5	5	4
2162	RO_BU_2162	19	2	33	19	99	4	1	5	1	99	99	99	0	0	99	99	0	1	0	99	99	99	0	5	5	5	1	5	5	5	5	99	99	99	99	99	99	99	99	99	99
2163	RO_BU_2163	19	2	33	19	2	5	5	4	1	4	4	0	0	0	0	1	0	1	1	0	0	0	0	5	5	3	4	5	4	5	4	5	5	5	4	5	5	5	5	5	4
2164	RO_BU_2164	19	2	33	20	2	5	4	3	3	4	4	0	0	0	0	0	0	99	0	1	0	0	99	4	5	4	1	4	4	5	2	5	5	5	5	5	5	5	5	5	5
2165	RO_BU_2165	19	2	33	19	1	4	4	4	1	99	99	0	0	1	0	0	0	1	1	0	0	0	1	5	5	5	5	5	5	5	5	5	5	5	5	4	5	5	5	4	5
2166	RO_BU_2166	19	2	33	18	99	4	3	4	1	4	4	0	0	0	0	0	0	0	1	0	0	0	0	99	99	5	99	99	99	99	99	99	5	99	5	5	99	5	5	5	5
2167	RO_BU_2167	19	2	33	19	2	4	1	4	1	4	4	0	0	0	1	1	0	1	0	99	1	0	0	5	3	4	4	4	1	5	5	5	5	4	5	5	5	5	5	3	4
2168	RO_BU_2168	19	2	33	20	2	5	6	5	1	12	12	0	0	0	0	0	0	1	1	0	0	0	0	5	3	5	2	5	3	4	4	1	1	1	1	1	1	1	1	1	1
2169	RO_BU_2169	19	2	33	19	99	5	1	2	1	99	99	99	0	99	1	0	0	0	0	99	0	0	0	5	3	99	2	2	4	2	1	5	4	5	3	5	3	5	3	2	1
2170	RO_BU_2170	19	2	33	19	2	4	99	5	2	4	4	0	0	0	0	0	0	1	1	0	0	1	0	5	4	5	2	5	3	5	1	4	4	2	4	1	4	1	3	3	1
2171	RO_BU_2171	19	2	33	19	2	5	6	5	1	4	4	0	0	1	0	0	1	1	1	0	0	0	0	3	3	3	3	3	3	3	3	3	3	3	3	3	3	3	3	3	3
2173	RO_BU_2173	19	2	33	19	2	5	4	4	1	4	4	0	0	0	0	0	0	0	0	0	0	1	1	5	5	5	1	5	5	5	1	5	5	5	5	1	5	5	5	5	1
2174	RO_BU_2174	19	2	33	20	2	5	99	4	1	4	4	1	0	1	0	0	0	1	1	0	0	1	0	5	5	3	5	5	5	5	5	5	5	5	4	3	3	4	4	3	4
2175	RO_BU_2175	19	2	33	19	1	4	4	3	1	4	4	1	0	0	0	0	0	1	1	0	0	99	0	4	3	2	1	3	4	2	1	5	5	5	4	5	5	5	5	4	5
2176	RO_BU_2176	19	2	33	19	2	4	1	3	1	4	4	0	0	0	0	1	0	0	1	99	99	99	99	1	2	4	99	5	99	99	99	99	99	99	99	99	99	99	99	99	99
2177	RO_BU_2177	19	2	33	19	1	4	99	3	1	4	4	0	0	0	0	0	0	0	0	99	0	99	1	99	99	99	99	99	99	99	99	99	99	99	99	99	99	99	99	99	99
2178	RO_BU_2178	19	2	33	19	2	4	2	5	1	4	4	0	1	0	0	0	1	0	99	99	99	99	99	99	99	99	99	99	99	99	99	5	5	4	4	4	2	2	2	2	2
2179	RO_BU_2179	19	2	33	18	2	5	2	4	2	4	4	0	0	0	0	0	0	0	0	0	0	0	1	5	5	4	3	4	4	3	2	5	5	5	5	5	5	5	5	5	5
2180	RO_BU_2180	19	2	33	19	2	4	4	3	3	4	4	99	0	0	0	0	0	1	1	0	0	1	1	5	5	5	2	3	2	5	2	5	4	4	3	3	5	4	3	5	3
2181	RO_BU_2181	19	2	33	19	99	4	99	2	1	4	4	1	0	0	0	0	0	0	0	0	1	0	1	5	3	5	1	5	5	5	4	5	5	3	3	5	3	3	3	1	5
2182	RO_BU_2182	19	2	33	19	2	4	5	4	1	4	4	1	99	0	0	1	0	1	0	0	0	0	99	5	3	5	2	5	4	5	2	2	4	1	2	1	1	2	1	1	1
2183	RO_BU_2183	19	2	33	19	1	5	1	4	3	4	4	0	0	0	0	0	0	99	0	99	0	0	1	3	3	3	3	3	3	3	3	1	3	3	3	3	2	2	1	1	1
2184	RO_BU_2184	19	2	33	19	99	5	4	4	1	4	4	0	0	0	0	0	0	1	1	0	0	1	0	5	5	3	3	5	3	5	3	5	5	5	5	5	5	5	5	5	5
2185	RO_BU_2185	19	2	33	19	1	4	4	4	1	4	4	0	0	0	0	1	0	1	1	0	0	0	1	5	4	3	3	4	4	5	2	3	3	2	3	2	2	2	2	1	2
2186	RO_BU_2186	19	2	33	19	2	5	99	4	1	4	4	0	0	0	1	0	0	1	0	0	1	0	0	3	4	3	2	99	5	2	2	4	5	3	4	3	3	2	3	4	3
2187	RO_BU_2187	19	2	33	19	2	4	3	4	2	4	4	0	0	0	0	0	0	1	0	0	0	1	1	5	5	5	2	4	5	1	3	4	4	3	1	2	4	3	4	1	4
2188	RO_BU_2188	19	2	33	19	2	5	7	4	1	4	4	0	0	0	1	1	0	1	1	0	0	1	1	4	4	3	2	4	4	4	3	5	5	4	5	4	3	4	4	2	3
2189	RO_BU_2189	19	2	33	19	1	4	3	2	1	4	4	0	0	0	0	0	0	0	1	0	0	1	1	5	99	4	1	5	5	5	1	99	99	99	99	99	99	99	99	99	99
2190	RO_BU_2190	19	2	33	19	1	5	5	4	1	4	4	0	0	0	0	0	0	1	1	0	0	0	0	5	5	5	2	5	3	5	5	3	3	4	2	1	2	1	1	2	1
2191	RO_BU_2191	19	2	33	19	2	5	5	4	3	4	4	0	0	0	1	1	0	1	1	1	0	1	0	5	4	3	3	4	3	3	3	99	99	99	99	99	99	99	99	99	99
2192	RO_BU_2192	19	2	33	20	1	4	4	4	1	4	4	0	0	0	0	0	0	0	1	99	0	0	0	4	5	5	3	2	4	3	5	99	99	99	99	99	99	99	99	99	99
2193	RO_BU_2193	19	2	33	19	1	4	99	2	1	4	4	0	0	0	0	0	0	1	0	0	0	0	0	4	4	3	3	1	4	3	3	5	5	5	4	3	5	4	4	3	4
2194	RO_BU_2194	19	2	33	19	2	3	1	4	1	4	4	0	0	1	0	0	0	0	0	0	0	1	0	5	4	4	1	4	2	3	2	1	1	1	1	1	1	1	1	1	1
2195	RO_BU_2195	19	2	33	19	99	5	4	3	1	4	4	0	0	0	1	0	1	0	0	1	1	0	0	99	99	99	99	99	99	99	99	99	99	99	99	99	99	99	99	99	99
2196	RO_BU_2196	19	2	33	20	99	5	2	4	1	4	4	0	1	0	0	0	0	1	1	0	0	0	0	5	5	4	3	5	4	5	5	3	2	4	1	1	2	1	1	1	1
2197	RO_BU_2197	19	2	33	19	99	4	2	4	1	99	99	0	0	0	0	0	0	1	1	0	99	0	0	5	5	3	5	5	3	1	5	5	5	5	5	5	5	5	5	1	4
2198	RO_BU_2198	19	2	33	19	2	5	99	4	3	4	4	1	0	0	0	0	0	1	1	0	0	0	0	5	5	3	5	5	3	1	5	5	5	5	5	5	5	5	5	1	4
2199	RO_BU_2199	19	2	33	19	2	5	4	4	1	4	4	0	0	0	0	0	0	1	1	0	1	1	1	99	99	99	99	99	99	99	99	5	4	4	4	2	4	3	1	1	1
2200	RO_BU_2200	19	2	33	19	1	5	1	4	1	4	4	0	0	0	0	0	0	1	0	0	0	0	0	5	4	3	5	5	5	3	3	5	5	5	4	4	5	3	5	3	4
2201	RO_BU_2201	19	2	33	19	2	5	4	5	1	4	4	1	0	0	0	0	0	1	1	0	0	0	0	5	4	3	2	3	4	4	2	5	5	5	4	5	5	5	4	4	5
2202	RO_BU_2202	19	2	33	18	99	5	4	4	1	4	4	1	1	0	0	1	0	1	1	1	0	1	0	5	4	3	2	4	1	4	3	5	5	5	5	5	5	5	5	5	5
2203	RO_BU_2203	19	2	33	18	2	4	6	5	2	4	4	0	0	0	0	0	0	1	1	0	0	1	1	5	5	5	2	5	5	5	3	4	3	3	2	2	3	2	2	2	2
2204	RO_BU_2204	19	2	33	19	99	4	4	3	1	4	4	0	0	1	0	1	0	1	1	0	0	1	1	5	4	4	1	5	1	3	3	99	99	99	99	99	99	99	99	99	99
2205	RO_BU_2205	19	2	33	19	1	4	2	4	1	4	4	0	0	0	1	1	0	0	0	0	0	1	0	5	5	5	3	4	4	3	4	3	3	2	1	2	3	3	3	3	3
2206	RO_BU_2206	19	2	33	19	99	5	4	4	1	2	2	0	0	1	1	0	1	0	0	0	0	1	1	99	99	99	99	99	99	99	99	99	99	99	99	99	99	99	99	99	99
2207	RO_BU_2207	19	2	33	19	1	4	99	4	2	4	4	0	0	1	0	0	0	1	1	0	0	0	1	5	5	4	4	4	4	5	5	5	5	5	5	4	5	5	4	5	4
2208	RO_BU_2208	19	2	33	19	1	5	4	3	2	4	4	0	0	0	1	0	0	0	1	0	0	0	0	4	3	3	2	99	3	4	2	5	5	5	4	4	4	4	3	4	4
2209	RO_BU_2209	19	2	33	18	1	5	99	2	2	4	4	99	0	0	0	1	1	1	1	0	0	0	0	4	4	3	4	4	4	5	3	4	4	3	4	3	3	4	2	2	3
2210	RO_BU_2210	19	2	33	19	2	1	1	2	2	4	4	0	0	0	0	0	0	0	0	99	0	99	0	99	99	99	99	99	99	99	99	4	4	4	4	4	4	4	4	4	4
2211	RO_BU_2211	19	2	33	19	99	4	4	4	2	4	4	1	0	1	99	99	99	1	1	0	0	1	0	5	4	4	3	4	2	4	4	5	5	5	4	5	5	5	5	4	5
2212	RO_BU_2212	19	2	33	20	2	5	4	4	1	4	4	1	0	0	1	0	0	0	0	0	99	99	99	99	99	99	99	99	99	99	99	5	5	5	4	5	4	5	4	4	5
2213	RO_BU_2213	19	2	33	20	2	5	99	4	1	2	2	0	0	0	1	0	0	0	99	0	99	0	0	3	3	5	1	4	1	4	1	5	5	5	5	5	5	5	5	4	4
2214	RO_BU_2214	19	2	33	19	2	4	5	4	1	4	4	0	0	0	0	0	1	0	0	0	1	0	1	5	4	3	1	4	5	4	3	5	3	2	3	2	3	2	2	4	3
2215	RO_BU_2215	19	2	33	19	2	4	6	5	1	1	1	0	1	1	1	0	1	0	0	99	0	0	0	3	2	3	99	99	3	2	2	4	5	4	5	4	5	4	5	5	5
2216	RO_BU_2216	19	2	33	18	99	4	4	2	1	4	4	0	99	99	99	99	99	99	99	0	0	0	0	4	4	3	2	5	2	5	1	5	5	5	5	4	4	5	4	5	5
2217	RO_BU_2217	19	2	33	19	2	5	5	4	1	4	4	1	0	0	0	0	0	1	1	0	0	99	0	5	4	3	3	5	4	4	1	5	4	3	3	2	4	4	4	3	2
2218	RO_BU_2218	19	2	33	20	99	5	99	3	1	4	4	1	0	0	0	0	0	0	0	0	0	1	99	5	5	4	4	5	5	5	3	99	99	99	99	99	99	99	99	99	99
2219	RO_BU_2219	19	2	33	20	2	4	99	4	1	4	4	0	0	0	1	0	0	1	0	0	0	0	0	5	4	4	3	4	3	3	3	5	4	3	5	1	3	3	2	1	1
2220	RO_BU_2220	19	2	33	20	2	5	6	5	1	4	4	0	0	0	0	1	0	1	0	0	0	0	1	5	5	4	5	4	4	4	4	4	3	3	4	1	4	1	2	3	1
2221	RO_BU_2221	19	2	33	18	2	4	5	5	1	4	4	1	0	0	0	1	0	1	1	0	0	0	0	5	3	4	3	4	1	1	3	3	3	2	1	2	2	2	1	1	1
2223	RO_BU_2223	19	2	33	20	2	4	4	5	1	4	4	99	99	99	99	99	99	99	99	99	99	99	99	99	99	99	99	99	99	99	99	5	5	3	3	3	3	4	3	3	2
2224	RO_BU_2224	19	2	33	19	2	4	2	2	2	4	4	0	0	1	0	1	0	0	0	0	0	0	0	5	3	4	3	4	4	4	3	5	5	4	4	4	4	4	4	4	4
2225	RO_BU_2225	19	2	33	19	2	4	99	5	1	4	4	0	0	0	0	0	0	1	1	0	0	0	0	4	4	4	1	4	4	4	2	5	5	4	3	2	3	2	2	4	2
2226	RO_BU_2226	19	2	33	19	2	5	5	5	1	4	4	0	0	0	0	0	0	1	1	0	0	1	0	5	5	5	5	5	5	5	5	5	5	5	5	4	5	5	4	5	4
2227	RO_BU_2227	19	2	33	20	1	4	4	3	1	4	4	1	0	1	0	0	0	1	1	0	0	0	0	5	5	5	3	3	5	5	1	5	5	5	5	2	5	5	5	5	5
2228	RO_BU_2228	19	2	33	19	2	4	5	4	1	4	4	0	0	0	0	0	0	1	1	99	99	1	0	5	5	5	2	5	5	5	1	5	5	5	5	4	4	5	4	3	5
2229	RO_BU_2229	19	2	33	19	2	4	4	4	2	4	4	0	0	0	0	0	0	1	1	0	0	1	0	5	5	5	2	5	4	5	1	5	4	5	4	4	4	4	4	4	4
2230	RO_BU_2230	19	2	33	19	2	5	7	4	1	4	4	0	0	0	0	0	0	1	0	0	0	1	1	5	4	5	2	5	3	5	5	3	5	4	3	3	3	2	4	3	1
2231	RO_BU_2231	19	2	33	19	2	4	2	4	2	1	1	0	0	0	0	0	1	0	0	1	0	0	0	5	4	4	1	5	5	5	1	99	99	99	99	99	99	99	99	99	99
2232	RO_BU_2232	19	2	33	19	2	5	7	4	3	4	4	0	0	0	0	0	0	1	1	0	0	1	0	5	5	5	2	5	4	4	3	5	5	4	5	4	4	4	5	3	4
2233	RO_BU_2233	19	2	33	19	99	4	4	4	2	4	4	0	0	0	0	0	0	1	1	0	0	1	0	5	5	5	2	5	4	4	3	5	5	4	5	4	4	4	5	3	4
2234	RO_BU_2234	19	2	33	19	1	5	99	4	1	4	4	0	0	0	0	0	0	0	0	0	0	1	99	99	99	99	99	99	99	99	99	99	99	99	99	99	99	99	99	99	99
2235	RO_BU_2235	19	2	33	19	1	4	99	4	3	4	4	0	0	0	0	0	0	0	0	0	0	0	0	5	5	5	4	5	4	5	3	99	99	99	99	99	99	99	99	99	99
2236	RO_BU_2236	19	2	33	19	2	4	2	4	1	4	4	0	0	1	0	0	0	0	1	0	0	0	0	5	4	3	2	2	3	4	2	5	5	5	5	4	4	4	3	4	4
2237	RO_BU_2237	19	2	33	20	2	5	1	4	3	4	4	1	0	0	0	0	0	0	0	0	1	0	1	5	5	3	3	4	3	5	3	5	5	5	5	5	5	5	5	5	5
2238	RO_BU_2238	19	2	33	20	99	4	6	5	1	4	4	0	0	0	0	0	0	0	0	0	0	0	0	2	4	3	4	3	3	1	4	3	2	3	3	3	3	2	2	4	1
2239	RO_BU_2239	19	2	33	20	2	5	4	3	2	4	4	0	0	0	0	0	0	1	1	0	0	1	0	3	4	4	2	5	3	4	2	5	5	5	3	4	5	5	4	3	4
2240	RO_BU_2240	19	2	33	19	2	4	5	4	1	4	4	0	0	0	0	0	0	0	0	1	0	0	0	3	3	3	3	3	3	3	3	3	3	3	3	1	3	1	2	1	2
2241	RO_BU_2241	19	2	33	18	1	5	2	3	1	3	3	0	0	1	1	0	0	0	1	0	0	0	0	4	5	4	2	3	4	3	1	5	1	2	1	2	2	1	3	1	1
2242	RO_BU_2242	19	2	33	19	2	4	99	2	3	4	4	0	0	0	0	0	0	1	0	0	0	1	1	5	4	2	2	2	2	4	3	5	5	5	5	5	5	5	5	5	5
2243	RO_BU_2243	19	2	33	18	1	4	99	4	1	4	4	0	0	0	0	0	0	1	1	0	0	0	0	1	4	4	5	4	4	1	4	5	5	5	4	4	5	5	4	4	4
2244	RO_BU_2244	19	2	33	19	2	5	4	4	1	4	4	1	0	0	0	0	0	1	0	0	0	0	0	5	4	4	1	4	3	4	1	5	5	5	4	4	5	5	5	3	5
2245	RO_BU_2245	19	2	33	19	2	4	4	4	1	4	4	99	0	1	1	0	0	1	0	99	0	0	0	5	4	4	1	3	3	5	1	5	5	5	5	4	5	5	5	4	4
2246	RO_BU_2246	19	2	33	19	1	4	99	5	1	4	4	0	0	0	0	0	0	0	1	0	0	0	0	3	5	3	3	4	4	3	3	99	99	99	99	99	99	99	99	99	99
2247	RO_BU_2247	19	2	33	19	2	4	99	4	1	99	99	99	99	99	99	99	99	99	99	99	99	1	0	5	3	5	5	5	4	5	2	3	4	2	3	1	2	4	1	3	1
2248	RO_BU_2248	19	2	33	19	2	4	5	3	2	4	4	0	0	0	0	0	0	1	0	0	0	0	0	5	5	5	1	5	3	3	3	5	5	5	5	5	5	5	5	5	5
2249	RO_BU_2249	19	2	33	19	2	4	99	3	1	11	11	0	0	0	0	0	0	1	1	0	0	1	0	5	4	4	4	4	4	4	3	4	4	5	4	4	3	5	5	5	4
2250	RO_BU_2250	19	2	33	19	2	4	5	3	1	4	4	0	0	1	1	0	0	1	1	0	0	1	0	3	4	3	2	3	4	3	2	5	5	5	5	4	4	4	4	4	3
2251	RO_BU_2251	19	2	33	19	2	5	5	5	1	4	4	0	0	0	0	0	0	1	0	0	0	99	0	4	5	3	2	1	3	3	5	99	99	99	99	99	99	99	99	99	99
2252	RO_BU_2252	19	2	33	19	2	5	99	5	1	4	4	1	0	0	1	0	99	99	99	0	1	0	0	99	99	99	99	99	99	99	99	5	4	2	1	3	4	1	4	3	1
2253	RO_BU_2253	19	2	33	18	99	5	99	4	1	4	4	0	1	1	0	0	0	0	1	0	0	0	0	5	5	5	3	3	5	3	3	99	99	99	99	99	99	99	99	99	99
2254	RO_BU_2254	19	2	33	18	99	4	2	2	1	4	4	1	0	0	0	0	0	1	1	0	0	0	0	5	5	1	4	5	2	5	5	5	5	5	5	5	3	5	5	3	5
2255	RO_BU_2255	19	2	33	19	2	5	7	4	1	4	4	0	99	1	1	1	0	1	0	99	0	99	0	5	4	3	4	1	3	4	1	5	4	3	2	1	2	3	4	5	5
2256	RO_BU_2256	19	2	33	21	1	3	4	2	2	4	4	1	0	0	1	0	0	1	0	0	0	0	0	4	4	4	4	4	5	5	4	1	1	1	1	1	1	1	1	1	1
2257	RO_BU_2257	19	2	33	18	2	4	3	4	1	4	4	0	0	0	0	0	0	1	1	0	0	1	0	5	5	5	5	5	5	5	5	2	2	2	1	1	1	3	1	2	1
2258	RO_BU_2258	19	2	33	19	1	5	5	4	1	4	4	1	0	0	1	0	0	1	1	0	0	0	1	5	4	3	2	3	5	4	4	4	5	3	2	4	3	4	3	5	4
2259	RO_BU_2259	19	2	33	19	2	4	99	3	3	4	4	0	0	0	0	0	0	0	0	0	0	0	0	4	3	5	4	1	4	2	1	4	2	3	4	3	2	5	1	5	2
2260	RO_BU_2260	19	2	33	19	99	4	3	3	1	4	4	0	0	0	0	0	0	0	0	0	0	0	0	5	5	5	1	1	5	99	1	5	5	5	5	5	5	5	5	5	5
2261	RO_BU_2261	19	2	33	19	2	5	5	4	2	4	4	0	0	0	1	0	0	0	0	0	1	1	0	5	5	99	3	1	3	3	4	4	4	3	3	3	3	3	1	3	3
2262	RO_BU_2262	19	2	33	20	1	5	4	4	3	4	4	1	0	0	1	0	0	0	0	99	99	99	99	99	99	99	99	99	99	99	99	99	99	99	99	99	99	99	99	99	99
2263	RO_BU_2263	19	2	33	18	2	4	3	2	2	4	4	99	0	0	99	0	0	0	0	99	0	99	99	99	99	99	99	99	99	99	99	5	5	5	5	5	5	4	5	5	5
2264	RO_BU_2264	19	2	33	20	1	5	99	4	1	4	4	1	0	0	99	99	0	1	0	99	0	0	1	4	4	99	99	99	99	99	99	99	99	99	99	99	99	99	99	99	99
2265	RO_BU_2265	19	2	33	19	2	5	4	3	3	4	4	1	0	0	0	0	0	0	0	99	0	0	0	3	4	2	4	2	4	3	4	5	5	5	5	5	5	5	5	5	5
2266	RO_BU_2266	19	2	33	20	2	5	5	4	2	4	4	0	0	0	1	0	1	0	0	0	0	1	0	99	99	99	99	99	99	99	99	99	99	99	99	99	99	99	99	99	99
2267	RO_BU_2267	19	2	33	19	2	5	4	4	1	4	4	1	0	0	0	99	99	99	99	0	99	1	1	5	5	5	4	5	5	5	4	2	2	1	1	1	1	2	1	1	1
2268	RO_BU_2268	19	2	33	19	2	5	4	4	1	4	4	0	0	0	0	0	0	0	1	0	0	1	0	3	3	3	3	3	3	3	3	4	4	4	4	4	4	4	4	4	4
2269	RO_BU_2269	19	2	33	19	2	5	4	4	1	4	4	0	0	0	0	1	99	99	99	99	99	99	99	99	99	99	99	99	99	99	99	99	99	99	99	99	99	99	99	99	99
2270	RO_BU_2270	19	2	33	19	99	4	4	4	1	99	99	0	0	0	0	0	0	1	1	0	0	0	0	5	5	4	4	5	4	3	1	5	3	3	3	2	4	4	3	2	2
2271	RO_BU_2271	19	2	33	19	2	4	3	4	1	4	4	0	0	0	0	0	0	0	1	99	99	99	99	99	99	99	99	99	99	99	99	99	99	99	99	99	99	99	99	99	99
2272	RO_BU_2272	19	2	33	20	1	5	99	5	1	4	4	0	0	0	0	0	0	1	1	0	0	0	0	5	3	5	5	3	1	4	5	5	4	4	4	3	3	3	3	2	3
2273	RO_BU_2273	19	2	33	18	2	4	2	2	3	4	4	99	99	99	99	99	0	99	99	99	99	99	0	99	99	99	99	99	99	99	99	99	99	99	99	99	99	99	99	99	99
2274	RO_BU_2274	19	2	33	19	2	4	4	4	1	4	4	0	0	0	1	0	0	0	0	1	0	0	1	99	5	99	99	99	2	99	99	99	99	99	99	99	99	99	99	99	99
2275	RO_BU_2275	19	2	33	99	99	99	99	99	99	99	99	99	99	99	99	99	99	99	99	99	99	99	99	99	99	99	99	99	99	99	99	99	99	99	99	99	99	99	99	99	99
2276	RO_BU_2276	19	2	33	19	2	5	5	4	1	4	4	1	0	1	0	0	1	1	1	0	0	0	1	5	5	5	1	5	5	5	3	3	3	3	3	3	1	3	3	3	1
2277	RO_BU_2277	19	2	33	19	2	4	4	4	1	4	4	0	0	0	0	0	0	0	0	0	0	0	0	5	4	4	3	5	4	5	3	3	3	5	3	1	3	2	2	2	1
2278	RO_BU_2278	19	2	33	19	2	4	99	3	2	4	4	0	0	1	0	0	0	1	1	0	0	0	0	3	4	3	4	3	1	3	5	4	3	2	3	4	5	3	3	2	1
2279	RO_BU_2279	19	2	33	18	2	4	4	3	1	4	4	0	0	0	0	0	0	1	1	0	0	1	1	5	5	4	2	5	4	5	1	5	5	5	4	4	5	5	4	5	2
2280	RO_BU_2280	19	2	33	20	2	5	4	4	1	4	4	0	0	0	0	0	1	1	0	0	0	0	0	2	4	5	3	5	4	5	2	5	4	5	2	99	1	2	3	5	1
2281	RO_BU_2281	19	2	33	19	2	5	6	5	1	4	4	0	0	0	0	0	0	1	1	0	0	0	1	5	4	5	5	2	3	4	3	5	5	5	5	3	3	4	3	3	3
2282	RO_BU_2282	19	2	33	18	99	4	5	4	1	4	4	0	0	0	0	0	0	1	1	0	1	0	1	5	5	4	2	5	3	5	2	4	4	4	2	4	4	2	4	3	2
2283	RO_BU_2283	19	2	33	19	1	5	4	3	1	4	4	0	0	0	0	0	0	0	0	99	0	0	1	99	99	99	99	99	99	99	99	5	3	3	3	1	4	3	2	2	3
2284	RO_BU_2284	19	2	33	19	2	5	4	4	1	4	4	0	0	0	0	0	0	1	1	0	0	0	0	5	3	4	4	5	3	5	4	5	5	4	5	3	4	5	5	5	5
2285	RO_BU_2285	19	2	34	20	2	5	99	5	1	12	12	0	1	1	0	1	1	1	0	0	0	0	0	5	4	5	5	4	5	5	4	1	1	1	2	2	99	1	1	4	1
2287	RO_BU_2287	19	2	34	20	1	4	99	4	3	4	4	0	0	0	0	0	0	1	1	0	99	1	0	5	3	5	1	5	3	5	1	99	99	99	99	99	99	99	99	99	99
2288	RO_BU_2288	19	2	34	19	1	5	99	4	1	11	11	1	0	1	0	1	1	1	1	0	0	1	0	5	4	4	5	5	5	5	4	99	99	99	99	99	99	99	99	99	99
2289	RO_BU_2289	19	2	34	19	1	5	2	4	3	11	11	1	0	1	0	1	0	0	0	0	0	1	0	4	5	5	5	4	5	5	4	1	1	1	1	1	1	1	1	1	1
2290	RO_BU_2290	19	2	34	19	1	4	4	5	1	4	4	0	0	0	0	0	0	0	1	0	0	1	1	5	5	5	5	5	5	5	5	99	99	99	99	99	99	99	99	99	99
2291	RO_BU_2291	19	2	34	19	2	4	3	2	3	4	4	1	0	1	1	0	0	1	0	0	0	0	0	5	4	3	4	5	5	4	3	3	3	2	1	1	4	1	1	1	1
2292	RO_BU_2292	19	2	34	19	2	5	99	4	1	4	4	1	0	0	0	0	0	1	0	0	0	0	0	5	4	4	4	4	4	5	3	2	2	1	1	1	1	1	1	1	1
2293	RO_BU_2293	19	2	34	20	1	4	4	4	1	4	4	0	0	0	0	0	0	0	0	0	0	1	0	5	5	4	5	5	3	5	5	99	99	99	99	99	99	99	99	99	99
2294	RO_BU_2294	19	2	34	19	2	4	99	4	1	10	12	0	0	0	0	0	0	99	0	99	0	0	0	3	3	3	3	3	3	3	3	3	3	3	3	3	3	3	3	3	3
2295	RO_BU_2295	19	2	34	21	1	5	6	5	1	11	11	1	1	99	99	99	99	99	99	99	99	99	99	99	99	99	99	99	99	99	99	1	1	3	1	1	1	1	1	1	1
2296	RO_BU_2296	19	2	34	19	2	5	99	4	1	4	4	0	0	99	0	0	0	1	0	0	0	1	1	5	5	4	5	5	4	5	4	4	4	4	3	3	4	3	3	3	3
2297	RO_BU_2297	19	2	34	19	1	4	5	4	2	4	4	0	0	0	0	0	0	0	0	0	0	0	0	1	2	1	4	5	4	1	2	5	5	5	5	5	5	5	5	5	5
2298	RO_BU_2298	19	2	34	20	1	4	99	4	1	4	4	0	0	0	0	0	0	1	1	0	0	1	0	5	4	4	3	5	4	5	3	99	99	99	99	99	99	99	99	99	99
2299	RO_BU_2299	19	2	34	20	1	5	5	4	2	4	4	0	1	0	0	0	0	1	0	0	0	0	1	5	4	4	4	5	3	5	4	3	4	3	2	1	3	1	1	1	1
2300	RO_BU_2300	19	2	34	20	1	5	2	5	1	11	11	0	99	0	0	0	0	99	0	99	0	0	0	5	4	4	2	5	4	5	1	1	1	1	1	1	1	1	1	1	1
2301	RO_BU_2301	19	2	34	19	2	5	7	4	1	4	4	0	0	0	0	0	1	0	1	0	0	1	0	3	2	3	3	4	2	5	4	5	5	5	5	5	5	5	5	5	5
2302	RO_BU_2302	19	2	34	19	1	4	4	4	1	4	4	0	0	0	1	0	0	0	0	0	0	0	1	5	5	5	1	4	4	5	2	5	5	5	5	1	5	3	3	5	1
2303	RO_BU_2303	19	2	34	19	2	2	4	4	1	4	4	0	0	0	0	1	1	1	1	0	0	0	0	5	5	5	3	5	3	3	3	1	1	1	1	1	1	1	1	1	1
2304	RO_BU_2304	19	2	34	19	2	5	4	4	1	4	4	0	0	0	1	0	0	1	0	0	0	0	0	5	1	5	1	5	1	5	1	4	4	2	3	3	3	4	2	4	1
2305	RO_BU_2305	19	2	34	19	2	4	4	4	3	4	4	0	0	1	0	1	0	1	1	0	0	0	0	5	5	5	2	5	5	5	4	5	5	5	4	3	5	5	5	1	4
2306	RO_BU_2306	19	2	34	18	2	2	99	2	1	4	4	0	0	0	0	0	0	99	0	0	0	0	0	3	4	3	4	4	2	3	2	3	3	3	3	3	3	3	3	3	3
2307	RO_BU_2307	19	2	34	19	2	5	99	5	1	4	4	0	0	0	0	0	0	1	0	0	0	1	1	2	4	5	5	5	5	4	5	5	5	5	5	4	5	3	5	5	3
2308	RO_BU_2308	19	2	34	19	2	4	3	5	1	4	4	1	0	1	0	1	1	1	1	0	0	0	1	5	2	4	4	5	2	5	3	4	3	2	1	2	1	3	2	1	1
2309	RO_BU_2309	19	2	34	19	1	4	99	5	1	4	4	0	1	0	0	0	0	0	0	0	0	0	1	5	4	5	5	5	4	5	4	4	3	3	4	2	5	2	3	2	3
2311	RO_BU_2311	19	2	34	19	1	4	99	5	1	11	11	0	0	0	1	0	0	1	0	0	0	1	1	5	5	5	5	5	5	3	5	1	1	1	1	1	1	1	1	1	1
2312	RO_BU_2312	19	2	34	19	2	4	3	3	1	4	4	0	0	0	0	0	1	1	0	0	0	0	0	3	3	4	3	5	5	4	1	4	4	5	3	2	3	3	3	3	3
2314	RO_BU_2314	19	2	34	19	1	5	2	4	1	11	11	0	0	1	0	0	0	1	0	0	0	0	0	5	5	1	3	5	4	5	4	1	1	1	1	1	1	1	1	1	1
2321	RO_BU_2321	19	1	35	20	2	4	99	4	2	4	4	0	1	1	0	0	0	1	1	0	0	0	0	4	3	5	3	5	5	5	1	5	5	5	4	5	5	5	5	5	5
2323	RO_BU_2323	19	1	35	19	1	4	4	5	1	4	4	0	1	0	0	0	0	1	99	0	1	1	0	5	4	4	4	5	3	3	3	5	5	5	5	5	5	5	5	5	5
2330	RO_BU_2330	19	1	35	20	1	4	99	3	2	4	4	1	0	0	0	1	0	1	1	0	0	1	0	2	1	1	1	5	3	3	1	5	5	5	5	5	5	5	5	5	4
2333	RO_BU_2333	19	1	35	19	2	5	7	4	1	4	4	1	0	0	0	0	0	1	1	0	0	0	1	5	3	5	5	4	1	4	5	5	5	5	5	5	5	5	5	5	5
2334	RO_BU_2334	19	1	35	19	2	5	6	4	1	4	4	1	1	0	0	1	0	1	1	0	0	1	1	5	4	4	2	4	4	4	2	5	5	5	5	4	5	5	5	99	5
2350	RO_BU_2350	19	1	35	19	1	5	4	3	1	4	4	0	0	0	0	0	0	1	1	0	0	1	1	5	4	4	2	5	4	5	2	5	5	5	4	5	5	5	5	4	4
2352	RO_BU_2352	19	1	35	18	2	5	7	5	1	4	4	0	0	0	0	0	0	1	1	0	0	0	1	5	4	4	5	3	4	5	2	5	5	5	5	5	5	5	5	5	5
2353	RO_BU_2353	19	1	35	21	2	5	5	4	1	4	4	1	0	1	0	0	0	1	1	0	0	1	0	4	5	3	4	5	1	5	3	3	4	3	2	2	3	3	3	3	1
2354	RO_BU_2354	19	1	35	20	2	2	6	5	1	4	4	0	0	0	0	0	0	1	1	0	0	0	0	5	4	3	4	3	3	5	3	4	3	4	3	2	3	4	3	2	2
2355	RO_BU_2355	19	1	35	18	2	5	5	5	2	4	4	0	0	0	0	0	0	0	0	0	0	0	0	5	3	5	5	4	5	5	3	5	5	3	4	2	5	3	3	4	2
2356	RO_BU_2356	19	1	35	19	2	5	5	4	3	4	4	0	0	0	0	0	0	1	1	0	0	0	1	5	4	4	3	4	3	4	4	5	5	5	4	2	3	3	4	3	2
2357	RO_BU_2357	19	1	35	19	2	5	5	4	3	4	4	0	0	0	0	0	0	1	1	0	0	0	1	5	4	4	3	4	3	4	4	4	4	3	3	1	4	3	2	4	2
2358	RO_BU_2358	19	1	35	18	2	5	7	4	1	4	4	0	0	0	0	1	0	1	0	0	0	1	0	5	4	3	3	4	4	5	4	5	5	5	5	5	5	5	5	4	5
2359	RO_BU_2359	19	1	35	18	2	5	5	4	3	4	4	0	0	1	0	1	0	1	0	0	0	0	1	5	3	3	3	4	3	4	2	5	4	4	3	3	3	3	2	4	2
2360	RO_BU_2360	19	1	35	19	1	5	6	5	1	4	4	0	0	1	0	1	0	1	1	0	1	1	1	5	3	4	4	4	3	3	4	4	3	4	3	1	4	2	2	5	2
2361	RO_BU_2361	19	1	35	19	2	5	7	3	3	4	4	0	0	0	1	0	0	1	1	0	1	1	0	5	3	4	4	3	4	4	3	4	2	3	4	5	2	3	2	4	3
2362	RO_BU_2362	19	1	35	19	2	5	7	5	1	4	4	0	0	0	0	0	0	1	1	0	0	1	1	5	5	5	5	5	5	5	5	5	4	5	5	4	4	5	5	4	4
2363	RO_BU_2363	19	1	35	19	2	5	5	5	1	4	4	1	0	0	0	1	0	1	1	0	0	1	1	5	4	4	3	4	4	3	4	4	5	5	4	4	4	3	3	2	3
2364	RO_BU_2364	19	1	35	19	2	5	7	4	1	4	4	1	1	1	0	1	1	1	1	0	0	1	1	5	5	5	5	4	4	4	3	3	3	2	1	1	3	3	1	2	1
2365	RO_BU_2365	19	1	35	19	2	4	7	4	1	4	4	0	0	0	0	0	0	1	0	0	0	0	0	5	5	5	5	3	3	4	4	4	4	4	4	3	4	3	2	3	3
2366	RO_BU_2366	19	1	35	19	2	5	7	4	2	4	4	1	0	0	0	1	0	1	0	0	0	0	0	5	5	5	5	3	5	5	4	5	4	4	5	3	5	3	4	4	3
2367	RO_BU_2367	19	1	35	20	2	5	7	5	1	4	4	1	0	0	0	0	0	1	0	0	0	1	0	5	5	4	5	5	5	5	5	5	5	4	5	4	4	4	4	4	4
2368	RO_BU_2368	19	1	35	19	2	5	7	4	1	4	4	0	0	0	0	1	0	1	1	0	0	0	0	5	5	5	3	3	5	5	5	5	5	5	5	4	3	5	5	3	4
2369	RO_BU_2369	19	1	35	19	2	5	7	5	2	4	4	0	0	0	0	1	0	0	0	0	0	0	0	5	5	4	4	3	4	5	4	4	5	3	5	2	4	3	3	3	3
2370	RO_BU_2370	19	1	35	19	1	5	5	4	3	4	4	0	0	0	0	0	0	0	0	0	0	0	1	3	5	5	3	4	3	5	3	3	3	3	3	3	3	3	3	3	3
2371	RO_BU_2371	19	1	35	19	2	5	7	4	1	4	4	0	1	0	1	1	0	1	1	0	0	1	0	5	4	5	3	1	2	5	5	3	2	1	2	2	2	1	1	1	1
2372	RO_BU_2372	19	1	35	18	2	5	7	5	1	4	4	0	0	0	0	0	0	1	0	0	0	1	1	5	5	4	2	3	5	5	5	5	5	5	2	4	4	3	1	1	1
2374	RO_BU_2374	19	1	35	19	2	5	4	4	2	2	2	1	0	1	0	0	0	0	0	0	0	0	0	5	1	5	5	5	5	1	5	5	5	5	5	5	5	5	5	5	5
2375	RO_BU_2375	19	1	35	19	2	5	7	4	2	4	4	0	0	0	0	0	0	1	0	0	0	0	0	5	4	4	4	3	3	4	3	5	5	5	5	4	4	5	4	3	4
2376	RO_BU_2376	19	1	35	18	2	5	7	4	2	11	11	1	0	0	0	1	0	1	1	0	0	0	1	5	4	5	5	1	5	5	4	1	4	1	1	1	1	1	1	1	1
2377	RO_BU_2377	19	1	35	19	2	5	7	4	3	4	4	1	0	0	0	1	0	1	1	0	0	1	1	5	4	5	5	1	4	5	4	1	4	1	1	1	1	1	1	1	1
2378	RO_BU_2378	19	1	35	19	2	5	6	4	2	4	4	0	0	0	0	0	0	1	0	0	0	0	1	1	1	1	1	1	1	1	1	5	5	5	5	5	5	5	5	5	5
2379	RO_BU_2379	19	1	35	18	2	5	4	4	1	4	4	0	0	1	0	0	0	1	1	0	0	0	1	4	2	3	1	3	2	4	1	5	5	5	4	5	5	5	5	5	5
2380	RO_BU_2380	19	1	35	19	2	5	7	5	3	3	3	1	0	0	0	0	0	0	0	0	0	0	0	5	5	5	5	3	3	5	5	5	5	5	4	4	5	4	5	4	1
2381	RO_BU_2381	19	1	35	19	2	5	7	3	2	4	4	1	0	0	0	1	0	1	1	0	1	0	0	5	2	5	3	3	3	5	1	1	1	1	1	1	2	1	1	3	1
2382	RO_BU_2382	19	1	35	19	2	5	4	3	2	11	11	1	0	0	0	1	0	1	1	0	1	1	0	5	5	5	5	5	5	5	5	1	1	1	1	1	1	1	1	1	1
2384	RO_BU_2384	19	1	35	20	2	3	7	5	1	4	4	0	1	0	0	0	0	0	0	0	0	0	1	5	3	4	3	3	3	5	2	4	4	4	1	3	3	2	2	4	2
2385	RO_BU_2385	19	1	35	18	2	5	7	2	2	4	4	0	0	0	0	0	0	1	0	0	0	0	0	5	5	5	5	5	3	5	3	5	5	5	4	5	5	5	5	5	5
2386	RO_BU_2386	19	1	35	20	1	4	7	5	1	4	4	1	0	0	0	0	1	0	1	0	0	0	1	5	4	5	1	2	5	5	2	5	5	5	5	5	5	5	5	5	5
2387	RO_BU_2387	19	1	35	19	2	2	6	4	2	4	4	1	0	0	1	0	0	1	1	0	1	1	0	5	3	3	2	5	3	3	2	5	5	5	4	4	5	5	5	3	5
2388	RO_BU_2388	19	1	35	19	2	5	7	5	2	4	4	0	0	0	0	1	0	1	1	1	0	0	1	5	5	5	2	4	5	5	4	5	5	5	5	4	5	5	4	4	3
2389	RO_BU_2389	19	1	35	19	2	2	6	5	1	4	4	1	0	1	0	0	0	1	1	0	1	1	0	5	3	4	3	3	5	5	3	5	5	3	4	3	5	4	3	3	5
2390	RO_BU_2390	19	1	35	19	2	5	1	3	2	4	4	0	0	0	0	0	0	0	0	1	0	0	0	5	4	4	2	5	5	5	5	3	3	4	3	1	3	1	1	2	1
2391	RO_BU_2391	19	1	35	19	2	5	5	4	2	4	4	1	0	0	1	0	0	1	1	0	0	1	0	5	3	3	2	5	3	3	2	5	5	5	4	4	5	5	5	3	5
2392	RO_BU_2392	19	1	35	20	2	5	6	4	2	4	4	0	0	0	0	0	0	0	0	1	0	0	0	2	1	4	1	5	1	2	1	5	4	4	5	4	4	4	4	4	4
2393	RO_CN_2393	19	2	36	19	1	5	4	5	3	4	4	0	0	0	0	1	0	0	1	0	0	1	0	5	4	4	4	4	4	5	3	1	1	1	1	1	1	1	1	1	1
2394	RO_CN_2394	19	2	36	19	2	4	3	3	2	4	4	1	0	0	0	1	0	1	0	0	0	0	0	5	5	3	2	5	4	5	3	5	4	2	4	1	3	4	1	1	1
2395	RO_CN_2395	19	2	36	19	2	4	2	2	2	4	4	0	0	0	0	1	0	0	0	0	0	0	1	5	4	5	3	2	3	4	5	5	5	4	5	4	5	4	5	4	4
2396	RO_CN_2396	19	2	36	20	2	4	2	4	2	4	4	0	0	0	0	0	0	1	1	0	0	0	0	5	4	3	4	3	3	4	2	5	5	3	5	3	4	4	4	3	4
2397	RO_CN_2397	19	2	36	20	2	5	5	5	1	4	4	1	0	0	0	1	0	1	1	1	0	1	1	4	4	3	3	3	4	4	2	5	5	5	4	3	4	2	3	4	2
2398	RO_CN_2398	19	2	36	19	2	4	4	3	2	3	3	0	0	0	0	0	0	1	1	0	1	0	0	5	4	5	2	5	4	5	2	5	4	2	4	1	3	3	4	3	2
2399	RO_CN_2399	19	2	36	19	1	5	4	4	1	4	4	0	0	0	0	0	0	1	0	0	0	1	1	5	5	3	2	3	2	4	4	5	5	4	4	2	3	5	5	4	2
2400	RO_CN_2400	19	2	36	19	1	4	2	5	1	11	11	0	0	0	0	0	0	1	0	0	0	1	0	5	5	5	3	5	5	5	5	1	1	1	1	1	1	1	1	1	1
2401	RO_CN_2401	19	2	36	18	2	4	2	2	3	4	4	0	0	0	0	0	0	1	1	0	0	1	0	5	4	3	3	3	5	5	3	5	5	4	5	4	4	5	4	3	3
2402	RO_CN_2402	19	2	36	19	2	3	2	5	1	3	3	0	0	0	0	0	1	1	0	0	0	0	0	3	3	3	3	3	3	3	3	3	3	3	3	3	3	3	3	3	3
2403	RO_CN_2403	19	2	36	20	2	4	3	2	3	4	4	0	0	0	0	0	0	1	1	0	0	0	0	3	3	3	3	3	3	3	3	5	5	5	5	4	5	5	4	3	5
2405	RO_CN_2405	19	2	36	18	2	4	3	4	2	4	4	0	0	0	0	0	0	1	0	0	0	0	0	4	1	4	4	4	1	4	1	5	5	4	5	4	5	5	5	5	4
2406	RO_CN_2406	19	2	36	19	2	4	3	2	1	4	4	1	0	0	0	0	0	1	0	0	0	0	1	5	4	5	2	2	3	4	1	5	5	5	5	5	5	4	5	5	5
2407	RO_CN_2407	19	2	36	19	2	4	4	3	1	4	4	1	0	0	0	0	0	1	0	0	1	1	0	5	5	5	5	2	4	5	5	3	3	3	3	2	1	2	1	1	1
2408	RO_CN_2408	19	2	36	19	2	4	4	5	2	4	4	0	0	0	0	1	0	1	0	0	0	1	0	5	5	1	1	5	5	3	3	3	3	2	1	2	3	2	2	4	4
2410	RO_CN_2410	19	2	36	19	2	5	6	4	1	4	4	0	0	0	0	1	0	1	0	0	0	1	1	5	4	2	3	3	4	5	4	5	5	5	4	5	5	3	4	4	5
2411	RO_CN_2411	19	2	36	19	1	3	1	3	3	12	12	0	0	0	0	0	0	1	1	0	0	1	0	5	5	4	3	5	1	5	3	2	2	2	1	1	1	1	1	1	1
2413	RO_CN_2413	19	2	36	19	2	4	3	3	1	4	4	0	0	0	0	0	0	0	0	0	0	1	0	5	5	5	1	3	5	4	3	2	4	4	5	2	2	5	3	1	1
2414	RO_CN_2414	19	2	36	19	2	4	3	2	1	4	4	0	0	0	1	0	0	0	0	0	0	1	1	5	4	3	4	3	4	5	2	5	5	3	4	4	4	5	5	3	5
2415	RO_CN_2415	19	2	36	19	2	4	2	3	3	4	4	0	0	0	1	0	0	1	0	0	0	1	0	5	5	4	5	4	3	5	3	5	5	2	3	2	5	4	4	1	2
2416	RO_CN_2416	19	2	36	19	2	4	2	3	3	4	4	0	0	0	0	0	0	1	0	0	0	1	0	4	5	5	3	4	3	3	3	5	4	3	4	3	3	3	3	4	3
2417	RO_CN_2417	19	2	36	19	1	4	4	3	2	99	99	0	0	0	0	1	0	1	0	0	0	1	0	5	5	5	5	5	3	5	4	1	1	1	1	1	1	1	1	1	1
2418	RO_CN_2418	19	2	36	19	2	5	4	5	1	1	1	0	0	0	0	0	0	1	1	0	0	1	0	1	1	1	5	1	1	1	5	1	5	5	5	5	5	5	5	5	5
2419	RO_CN_2419	19	2	36	19	2	5	3	4	1	4	4	0	0	0	0	0	0	0	0	0	0	0	0	5	5	4	4	3	3	4	3	5	5	5	4	4	5	5	4	3	3
2420	RO_CN_2420	19	2	36	19	2	4	3	4	3	99	99	0	0	0	0	0	0	1	1	0	0	0	1	5	5	5	5	5	4	5	5	5	5	4	1	1	1	1	1	1	1
2421	RO_CN_2421	19	2	36	19	2	4	3	3	2	4	4	0	0	0	0	0	0	1	1	0	1	0	0	5	5	5	1	4	5	5	1	5	5	5	5	5	5	5	5	5	5
2422	RO_CN_2422	19	2	36	19	1	3	4	3	2	4	4	0	0	1	0	0	0	1	0	0	0	1	0	4	4	4	4	2	3	4	4	4	3	3	3	2	3	2	3	2	2
2423	RO_CN_2423	19	2	36	19	2	4	4	2	2	4	4	0	0	0	0	1	0	1	0	0	0	0	0	5	4	3	5	3	2	3	1	5	5	4	4	3	5	4	3	5	2
2424	RO_CN_2424	19	2	36	19	2	4	3	4	2	4	4	0	0	0	0	0	0	1	1	0	0	0	1	5	5	5	4	1	5	5	5	3	2	2	1	1	1	2	1	2	1
2425	RO_CN_2425	19	2	36	19	2	4	1	3	2	4	4	0	0	0	0	1	0	0	0	0	0	0	0	4	4	4	4	3	3	4	4	4	3	2	2	2	3	4	3	2	2
2426	RO_CN_2426	19	2	36	19	2	4	1	5	1	4	4	0	0	0	0	0	0	1	1	0	0	1	0	5	5	4	3	4	1	5	2	4	3	2	1	1	3	1	1	1	1
2427	RO_CN_2427	19	2	36	19	2	4	3	3	2	4	4	0	0	0	0	0	0	1	1	0	0	1	0	5	4	3	2	3	3	2	1	5	4	4	4	3	4	4	5	4	4
2428	RO_CN_2428	19	2	36	18	1	4	3	4	1	4	4	0	0	1	0	1	0	0	0	0	0	0	1	5	4	5	4	3	4	5	5	3	3	3	4	1	3	3	3	1	3
2429	RO_CN_2429	19	2	36	18	1	4	3	4	3	4	4	0	0	0	0	1	1	1	1	0	0	1	0	5	3	4	4	5	3	5	3	4	3	2	2	2	3	2	2	4	1
2430	RO_CN_2430	19	2	36	18	1	5	5	5	1	4	4	1	0	0	0	1	0	1	1	0	0	1	0	5	5	5	3	5	5	5	4	1	1	1	1	1	1	1	1	1	1
2431	RO_CN_2431	19	2	36	18	2	4	1	3	3	4	4	0	0	0	0	0	0	0	0	0	0	0	0	3	3	3	3	3	3	3	3	4	2	4	3	3	3	3	4	2	4
2432	RO_CN_2432	19	2	36	20	1	4	4	4	1	12	12	0	0	0	0	1	0	1	1	0	1	0	0	1	4	5	5	1	3	2	2	5	5	4	4	4	5	4	5	5	5
2433	RO_CN_2433	19	2	36	20	1	4	3	5	1	4	4	0	0	0	0	0	0	0	0	0	0	0	0	5	5	4	3	3	3	2	2	3	3	3	3	3	3	3	3	3	3
2434	RO_CN_2434	19	2	36	20	2	4	5	4	3	4	4	0	0	0	0	0	0	1	1	0	0	0	0	5	4	2	2	4	4	3	1	5	5	4	4	5	5	4	3	4	3
2435	RO_CN_2435	19	2	36	20	2	4	3	2	2	4	4	1	0	0	0	0	0	1	1	0	0	1	1	5	4	3	5	3	4	4	2	5	5	4	4	3	3	4	4	3	3
2438	RO_CN_2438	19	2	36	19	2	5	3	4	1	4	4	0	0	0	0	0	0	0	0	0	0	0	1	5	5	5	5	4	5	5	3	1	1	1	1	1	1	1	1	1	1
2439	RO_CN_2439	19	2	36	19	2	4	3	5	1	4	4	0	0	0	0	0	0	1	1	0	0	0	0	4	3	3	2	1	4	3	3	5	3	3	4	2	3	2	2	3	1
2440	RO_CN_2440	19	2	36	19	2	3	4	2	3	4	4	0	1	0	0	1	1	1	0	0	0	0	0	4	4	3	4	3	2	4	4	5	5	5	5	4	5	5	5	5	4
2441	RO_CN_2441	19	2	36	19	2	4	1	4	1	4	4	0	0	0	0	1	0	1	1	0	0	1	0	5	5	4	4	5	4	5	4	5	5	5	4	4	4	4	4	3	3
2442	RO_CN_2442	19	2	36	19	2	4	4	3	2	4	4	0	0	0	0	0	0	1	0	0	0	0	0	5	3	4	4	3	4	3	4	5	5	5	4	4	5	5	4	3	3
2443	RO_CN_2443	19	2	36	19	2	4	4	4	3	4	4	0	1	0	0	0	0	1	1	0	0	0	0	5	3	4	4	3	2	4	1	5	5	5	5	5	5	5	5	5	5
2445	RO_CN_2445	19	2	36	19	2	5	4	4	1	4	4	0	0	0	0	0	0	1	1	0	0	1	0	5	4	4	4	5	4	5	4	5	5	5	5	5	5	5	5	5	5
2446	RO_CN_2446	19	2	36	19	2	3	1	3	2	4	4	0	0	0	0	1	1	1	0	1	0	1	0	5	4	4	2	3	3	4	5	5	5	5	4	4	2	4	5	2	3
2447	RO_CN_2447	19	2	36	19	2	4	4	4	3	4	4	1	1	0	0	0	0	1	0	1	0	0	0	3	4	4	1	1	5	3	1	5	5	5	5	5	5	5	5	5	5
2448	RO_CN_2448	19	2	36	19	1	5	7	5	2	99	99	1	1	1	0	1	1	1	1	0	0	0	0	5	5	5	1	5	5	5	5	1	1	1	1	1	1	1	1	1	1
2449	RO_CN_2449	19	2	36	19	1	99	5	5	1	4	4	0	0	0	0	1	1	1	0	0	0	0	0	4	5	5	3	2	4	5	2	1	1	1	1	1	2	1	1	1	1
2450	RO_CN_2450	19	2	36	19	1	4	1	4	1	4	4	0	1	0	0	1	0	1	1	0	0	0	1	5	1	5	3	5	3	5	1	3	3	1	2	2	4	1	1	5	1
2451	RO_CN_2451	19	2	36	19	1	4	4	5	1	4	4	1	0	0	0	0	1	99	0	0	0	0	1	5	5	5	1	4	2	4	1	1	2	2	1	1	1	1	1	1	1
2452	RO_CN_2452	19	2	36	19	1	4	7	5	1	99	99	0	1	1	0	1	0	1	0	0	0	0	0	5	5	5	4	5	4	5	3	1	1	1	1	1	1	1	1	1	1
2453	RO_CN_2453	19	2	36	19	1	4	2	3	1	4	4	0	0	0	0	0	0	1	0	0	0	0	1	5	5	5	3	2	5	5	4	1	1	2	1	1	1	1	1	1	1
2454	RO_CN_2454	19	2	36	19	1	4	3	4	1	4	4	0	0	0	0	1	0	1	0	0	0	0	0	5	5	5	5	4	5	5	5	5	4	4	3	1	4	1	3	3	1
2455	RO_CN_2455	19	2	36	19	1	4	2	2	3	4	4	0	0	0	0	0	0	1	1	0	0	0	0	5	5	4	4	3	5	4	4	4	4	3	3	3	3	1	1	1	1
2456	RO_CN_2456	19	2	36	19	1	5	3	4	1	4	4	1	0	1	0	1	1	1	1	0	0	0	0	5	4	4	5	3	4	5	4	4	4	3	3	3	3	3	3	3	3
2457	RO_CN_2457	19	2	36	19	2	4	1	4	2	4	4	0	0	1	0	1	0	1	1	0	0	0	0	5	4	5	2	4	4	5	4	5	5	5	4	4	3	4	3	3	3
2458	RO_CN_2458	19	2	36	19	2	5	6	5	1	4	4	0	0	1	0	1	0	1	0	0	0	1	0	5	3	2	2	4	4	5	3	1	1	1	1	1	2	1	1	2	1
2459	RO_CN_2459	19	2	36	19	2	5	4	5	1	4	4	0	0	0	0	1	0	1	1	0	0	0	1	5	5	5	5	3	4	5	2	2	2	2	1	1	1	1	1	1	1
2460	RO_CN_2460	19	2	36	19	2	4	6	3	3	4	4	1	0	0	1	0	0	1	1	0	0	0	0	4	4	5	5	4	4	3	5	1	1	1	1	2	1	2	1	1	1
2461	RO_CN_2461	19	2	36	19	2	4	3	5	1	4	4	0	0	0	0	1	0	1	1	0	0	1	1	5	5	5	5	5	4	5	3	2	1	1	1	1	2	1	1	1	1
2463	RO_CN_2463	19	2	36	19	2	4	3	4	1	4	4	0	0	1	0	0	0	1	1	0	0	1	0	5	5	5	5	1	1	5	5	3	3	1	3	1	3	1	1	3	1
2464	RO_CN_2464	19	2	36	19	2	4	3	4	3	4	4	0	0	0	0	0	0	0	1	0	0	0	0	5	4	5	4	3	4	5	5	4	4	3	3	2	4	2	2	3	1
2465	RO_CN_2465	19	2	36	19	2	5	4	5	1	4	4	0	0	0	0	1	0	1	0	0	0	0	1	5	4	5	3	4	3	4	2	3	3	3	2	1	3	3	3	3	1
2466	RO_CN_2466	19	2	36	19	2	4	1	4	1	3	3	0	0	0	0	1	0	1	0	0	0	0	0	5	5	5	4	5	3	5	5	2	1	4	1	1	2	1	1	1	1
2467	RO_CN_2467	19	2	36	19	2	4	4	3	2	12	12	0	0	0	0	0	0	1	1	0	0	0	0	5	4	4	3	3	5	5	3	5	5	5	4	4	4	4	4	3	3
2476	RO_CN_2476	19	2	36	18	2	4	6	3	1	4	4	0	0	0	0	0	0	1	0	0	0	1	0	2	4	4	3	3	3	3	3	4	4	3	4	4	4	3	4	4	3
2477	RO_CN_2477	19	2	36	18	2	4	3	2	3	4	4	0	0	0	0	0	0	1	1	0	0	0	0	5	4	4	3	5	2	5	3	3	3	3	2	1	1	1	1	1	1
2478	RO_CN_2478	19	2	36	18	2	5	3	3	3	4	4	1	0	0	0	0	0	1	1	0	1	0	0	5	4	1	2	5	5	5	2	4	3	3	2	1	2	1	1	1	2
2479	RO_CN_2479	19	2	36	18	2	3	3	4	1	4	4	0	0	1	0	0	0	1	1	0	0	1	0	4	4	5	4	3	4	5	4	5	5	5	5	5	5	5	5	5	5
2480	RO_CN_2480	19	2	36	18	2	4	4	4	3	4	4	0	0	0	0	1	0	1	1	1	0	1	0	5	5	5	5	5	4	5	4	1	1	1	3	2	3	1	1	1	1
2481	RO_CN_2481	19	2	36	18	2	5	7	5	1	4	4	1	0	1	0	1	1	1	1	0	0	0	1	5	4	3	2	4	4	2	3	5	4	3	4	4	4	3	4	2	3
2483	RO_CN_2483	19	2	36	18	2	4	3	4	3	4	4	0	0	0	0	0	0	0	0	0	0	0	0	5	5	3	4	4	3	3	3	4	4	4	3	3	4	4	3	3	3
2484	RO_CN_2484	19	2	36	18	2	3	3	5	1	4	4	0	0	0	0	0	0	1	1	0	1	1	0	5	4	5	5	5	3	5	3	5	5	5	5	3	5	5	5	3	4
2485	RO_CN_2485	19	2	36	18	1	5	5	3	3	4	4	1	1	1	0	1	0	1	1	0	0	0	1	5	4	5	4	5	4	5	3	3	3	3	3	3	3	3	3	3	3
2486	RO_CN_2486	19	2	36	19	2	5	7	5	2	99	99	1	0	1	0	1	1	1	0	1	1	1	1	5	5	5	4	5	3	5	5	1	1	1	1	1	1	1	1	1	1
2487	RO_CN_2487	19	2	36	19	1	4	3	4	2	4	4	0	1	0	0	0	0	0	0	0	0	0	0	5	4	3	2	2	3	4	3	5	3	3	4	4	5	2	3	4	3
2488	RO_CN_2488	19	2	36	19	2	5	6	3	1	4	4	0	0	0	0	0	0	1	1	0	0	0	0	4	5	4	3	3	4	5	4	5	4	3	4	4	4	3	4	2	3
2489	RO_CN_2489	19	2	36	19	2	5	7	4	1	4	4	0	0	0	0	0	0	0	0	0	0	0	0	5	5	5	5	2	3	5	5	5	5	5	5	5	5	5	4	3	4
2490	RO_CN_2490	19	2	36	19	2	5	6	4	1	4	4	0	0	0	0	0	0	1	0	0	0	0	1	5	4	5	5	4	4	5	4	2	2	2	1	1	1	1	1	1	1
2491	RO_CN_2491	19	2	36	19	2	5	7	4	1	12	12	0	0	0	0	0	0	1	1	0	0	0	0	5	3	5	5	4	5	5	3	5	5	5	5	2	5	3	4	5	3
2492	RO_CN_2492	19	2	36	19	2	5	6	4	2	4	4	0	0	0	0	0	0	1	1	0	0	0	0	5	4	4	3	4	3	4	4	3	3	1	1	3	1	1	1	1	1
2493	RO_CN_2493	19	1	36	19	2	5	7	4	3	4	4	0	0	0	0	0	0	0	0	0	0	0	0	5	5	4	4	5	4	3	4	4	4	3	3	3	4	4	3	4	3
2494	RO_CN_2494	19	1	36	19	2	5	5	4	2	99	99	0	0	0	0	0	0	1	0	0	0	0	1	5	4	5	4	5	4	5	3	1	1	2	1	1	1	1	1	1	1
2495	RO_CN_2495	19	1	36	19	2	5	7	4	3	4	4	1	0	1	0	1	0	0	1	0	1	0	0	5	4	3	3	4	3	3	4	4	3	4	3	2	3	2	2	3	2
2496	RO_CN_2496	19	1	36	19	2	5	6	4	2	4	4	1	0	0	0	0	0	0	0	0	0	1	0	5	1	5	5	2	2	4	4	5	5	5	3	3	5	3	3	3	3
2497	RO_CN_2497	19	2	36	19	2	5	6	5	1	3	3	0	0	1	0	1	0	1	1	0	0	1	0	5	5	5	4	5	3	5	4	4	4	3	3	3	3	5	3	3	2
2498	RO_CN_2498	19	1	36	19	2	5	7	4	1	4	4	0	0	0	1	1	0	0	0	0	0	0	0	4	5	3	4	4	5	5	5	5	5	5	4	5	5	5	4	4	4
2499	RO_CN_2499	19	2	36	20	2	5	6	4	1	4	4	0	0	1	0	1	0	1	1	0	1	0	0	5	1	5	5	1	5	5	1	3	4	3	3	2	1	4	3	3	3
2500	RO_CN_2500	19	1	36	20	2	5	7	4	2	4	4	1	0	1	0	0	0	1	1	0	0	0	1	5	5	5	5	5	5	5	5	5	5	5	5	3	5	5	3	4	4
2502	RO_CN_2502	19	1	36	18	2	5	7	5	1	4	4	0	0	0	0	0	0	0	0	0	0	0	1	5	5	3	3	4	3	5	3	5	4	3	5	5	5	5	5	4	2
2503	RO_CN_2503	19	1	36	18	1	5	7	5	1	4	4	0	0	0	0	1	1	1	0	0	0	0	1	4	5	5	3	4	4	5	5	3	3	3	2	2	3	3	3	2	2
2504	RO_CN_2504	19	1	36	19	2	5	4	4	2	4	4	0	1	0	0	0	0	1	1	0	1	0	0	5	2	5	4	3	3	5	1	5	5	5	5	2	5	4	2	2	1
2505	RO_CN_2505	19	1	36	19	2	5	7	4	1	4	4	1	0	0	0	0	1	1	1	0	0	0	0	5	4	4	3	3	4	5	3	5	5	5	5	5	5	5	5	5	5
2506	RO_CN_2506	19	1	36	19	2	4	7	5	1	99	99	0	0	1	0	1	0	1	1	0	0	1	0	5	5	5	5	5	5	5	5	1	1	1	1	1	1	1	1	1	1
2507	RO_CN_2507	19	1	36	19	2	5	5	4	2	4	4	0	0	0	0	1	0	1	1	0	0	1	0	1	4	5	3	2	5	2	1	5	4	4	3	4	4	3	3	3	3
2508	RO_CN_2508	19	1	36	19	2	5	6	4	1	4	4	0	0	0	0	0	0	1	1	0	0	1	0	5	5	5	5	3	2	5	5	1	1	1	2	1	1	1	1	1	1
2509	RO_CN_2509	19	1	36	19	2	5	7	4	2	4	4	0	0	0	1	0	0	1	0	0	0	1	0	5	4	5	5	5	4	5	5	3	4	3	4	2	3	3	3	3	3
2510	RO_CN_2510	19	1	36	19	2	5	7	2	2	4	4	0	0	0	0	0	0	1	1	0	0	0	0	5	5	5	4	3	3	4	4	5	5	5	5	5	5	5	5	5	4
2511	RO_CN_2511	19	1	36	19	2	5	5	5	1	12	12	0	0	0	0	0	0	1	1	0	0	1	1	5	5	5	5	5	4	5	5	4	2	1	2	1	3	2	2	3	1
2512	RO_CN_2512	19	1	36	19	2	5	6	4	2	1	1	0	0	0	0	1	0	1	0	0	0	1	0	1	2	5	1	4	1	1	1	5	5	5	4	2	2	4	4	5	3
2513	RO_CN_2513	19	1	36	19	2	5	7	2	2	4	4	0	0	0	0	0	0	1	1	0	0	0	0	5	5	5	4	3	3	4	4	5	5	5	5	5	5	5	5	5	4
2514	RO_CN_2514	19	1	36	19	2	5	7	4	2	4	4	0	0	0	0	0	0	1	0	0	0	1	0	5	4	5	5	5	4	5	5	3	4	3	4	2	3	3	3	3	3
2515	RO_CN_2515	19	1	36	19	2	5	6	4	1	4	4	0	0	0	0	0	0	1	1	0	0	1	0	5	5	5	5	3	2	5	5	1	1	1	2	1	1	1	1	1	1
2516	RO_CN_2516	19	1	36	19	2	5	5	4	2	4	4	0	0	0	0	1	0	1	1	0	0	1	0	5	1	4	1	3	2	5	2	5	5	4	4	3	4	4	3	3	3
2517	RO_CN_2517	19	1	36	19	2	5	6	4	2	4	4	1	1	1	0	0	0	1	1	0	0	0	0	5	4	3	3	4	3	4	2	5	5	5	5	4	5	5	5	5	4
2518	RO_CN_2518	19	1	36	19	2	5	7	4	1	4	4	0	0	0	0	0	0	1	1	0	0	1	0	5	5	3	3	2	5	4	3	5	5	5	5	5	5	5	5	5	5
2519	RO_CN_2519	19	1	36	19	2	4	7	4	2	4	4	0	0	0	0	0	0	1	0	0	0	0	0	5	3	2	2	4	2	3	2	5	4	5	5	3	5	4	3	3	4
2521	RO_CN_2521	19	1	36	19	3	5	7	5	2	4	4	0	0	1	0	0	1	1	1	0	0	1	1	5	4	5	3	5	3	5	5	1	1	3	1	1	1	1	1	1	1
2522	RO_CN_2522	19	1	36	19	2	5	7	5	1	99	99	0	0	0	0	1	0	1	1	0	0	1	0	5	4	5	4	3	5	1	5	1	1	1	1	1	1	1	1	1	1
2523	RO_CN_2523	19	1	36	19	2	5	7	5	1	4	4	0	0	1	0	1	1	1	0	0	0	1	0	5	5	5	5	5	5	5	5	5	5	1	4	2	1	5	3	1	1
2524	RO_CN_2524	19	1	36	19	2	5	4	3	2	4	4	0	0	0	0	1	0	1	1	0	0	1	0	5	5	5	5	1	5	5	5	3	3	4	3	2	1	2	3	3	1
2525	RO_CN_2525	19	1	36	19	1	5	3	5	1	4	4	0	0	1	0	0	0	1	1	0	0	0	0	5	4	4	3	3	4	5	3	5	5	5	5	4	4	5	4	4	4
2526	RO_CN_2526	19	1	36	19	1	5	5	5	1	4	4	0	0	0	0	0	0	1	1	0	0	0	0	5	4	5	2	5	1	5	3	1	1	1	1	1	1	1	1	1	1
2527	RO_CN_2527	19	1	36	19	1	5	6	4	1	4	4	1	0	0	0	0	1	1	1	0	0	1	0	5	5	5	2	5	5	5	1	1	1	1	1	2	1	1	1	1	1
2528	RO_CN_2528	19	1	36	19	2	5	7	4	2	4	4	0	0	1	0	1	1	1	0	0	0	1	1	5	3	4	3	4	3	3	3	3	4	3	3	3	4	4	3	5	3
2529	RO_CN_2529	19	1	36	19	2	5	7	4	1	1	1	0	0	0	1	1	0	1	1	0	0	1	0	2	2	5	4	4	4	4	2	5	4	2	4	2	1	3	4	1	4
2530	RO_CN_2530	19	1	36	19	2	5	7	4	2	4	4	1	0	1	0	1	1	1	0	0	0	1	0	5	4	5	5	5	3	5	1	5	5	4	5	2	2	5	1	5	5
2531	RO_CN_2531	19	1	36	19	2	5	7	5	1	4	4	0	0	1	0	0	1	0	0	0	0	0	0	5	5	4	1	4	5	2	3	2	3	3	5	3	4	5	5	5	5
2532	RO_CN_2532	19	1	36	19	2	5	5	4	2	3	3	0	0	1	0	1	0	1	0	0	0	0	0	5	5	5	4	3	4	4	3	5	3	5	1	1	4	2	1	1	1
2533	RO_CN_2533	19	1	36	18	2	5	7	5	1	4	4	0	0	0	0	0	0	1	0	0	0	0	1	5	1	5	5	5	2	5	1	2	3	4	2	1	4	1	1	1	1
2534	RO_CN_2534	19	1	36	18	2	5	6	4	1	4	4	0	0	1	1	1	0	1	1	0	0	0	0	5	5	4	5	4	4	4	3	5	5	5	4	5	5	4	5	5	5
2535	RO_CN_2535	19	1	36	18	2	5	7	5	1	4	4	0	0	0	0	1	0	1	0	0	0	0	0	5	1	5	3	5	3	5	1	5	4	4	4	2	5	5	4	4	1
2536	RO_CN_2536	19	1	36	18	2	4	4	4	1	4	4	0	1	0	0	0	0	1	0	0	0	1	0	5	4	3	1	4	5	3	1	5	5	5	5	5	5	4	5	4	4
2537	RO_CN_2537	19	1	36	18	2	5	5	5	1	4	4	1	0	1	0	0	0	1	1	0	0	0	1	5	5	5	4	3	5	5	3	4	3	5	3	2	3	3	2	2	2
2538	RO_CN_2538	19	1	36	19	1	5	7	5	2	99	99	0	0	1	0	1	1	0	0	0	0	1	1	5	5	5	5	5	3	5	5	1	1	1	1	1	1	1	1	1	1
2539	RO_CN_2539	19	1	36	19	1	5	7	4	2	4	4	0	0	1	0	1	0	0	0	0	0	1	0	5	3	5	4	4	2	5	3	5	5	5	5	5	4	4	4	5	4
2540	RO_CN_2540	19	1	36	19	1	5	7	5	1	4	4	0	1	0	0	0	0	1	0	0	0	0	0	5	5	5	5	5	5	5	5	1	1	2	1	1	1	1	1	1	1
2541	RO_CN_2541	19	2	36	20	2	4	3	2	2	4	4	0	0	0	0	1	0	1	0	0	0	0	0	5	5	4	5	4	4	5	5	5	5	4	4	1	3	5	4	2	4
2542	RO_CN_2542	19	2	36	20	1	4	5	4	3	99	99	0	1	1	0	0	0	1	0	0	0	0	0	5	4	3	3	3	4	5	3	3	3	4	2	1	2	2	3	2	2
2543	RO_CN_2543	19	1	36	20	1	4	3	4	1	4	4	1	0	1	0	1	1	1	1	1	0	1	0	5	5	5	3	3	5	5	3	3	3	2	1	1	1	1	1	1	1
2544	RO_CN_2544	19	1	36	19	2	5	5	4	1	4	4	0	1	0	0	0	0	0	1	0	0	0	0	5	5	4	4	3	5	5	3	5	5	5	5	5	5	5	5	5	5
2545	RO_CN_2545	19	1	36	20	2	5	7	4	1	4	4	0	0	0	0	1	0	0	0	0	0	1	0	5	5	4	4	5	4	5	5	1	1	1	1	1	1	1	1	1	1
2546	RO_CN_2546	19	1	36	19	2	5	7	4	1	4	4	1	1	1	0	1	1	1	1	0	0	0	0	5	4	4	5	5	4	5	3	5	5	3	5	4	5	5	5	5	2
2547	RO_CN_2547	19	1	36	18	2	5	5	5	1	4	4	1	0	1	0	1	1	0	0	0	0	0	0	5	5	4	5	5	5	5	5	1	1	2	1	3	1	1	1	1	1
2548	RO_CN_2548	19	1	36	20	2	5	7	5	1	4	4	0	0	0	0	0	0	0	1	0	0	99	1	5	5	5	5	5	3	3	3	3	3	3	3	3	3	3	3	3	3
2549	RO_CN_2549	19	1	36	20	2	5	7	5	1	4	4	0	0	0	0	0	0	1	1	0	0	0	0	3	3	3	1	5	5	3	99	5	3	3	3	3	3	3	3	3	3
2550	RO_CN_2550	19	1	36	18	2	5	7	4	3	3	3	0	1	1	0	0	0	1	1	0	0	1	0	3	3	3	5	1	1	1	5	1	1	1	1	1	1	1	1	1	1
2551	RO_CN_2551	19	1	36	18	2	5	5	3	2	4	4	0	0	0	0	0	0	1	0	0	0	1	0	5	4	4	4	5	4	5	4	2	1	3	2	1	2	1	1	1	1
2552	RO_CN_2552	19	1	36	18	2	5	7	4	2	4	4	0	0	1	0	0	0	0	0	0	1	0	0	99	5	5	1	1	3	2	1	2	5	5	5	5	5	5	5	4	4
2553	RO_CN_2553	19	1	36	18	2	5	7	5	1	4	4	0	0	0	0	1	0	1	1	0	0	0	0	5	5	4	3	3	4	5	3	5	5	5	5	5	5	5	5	5	5
2554	RO_CN_2554	19	1	36	18	2	5	6	4	2	12	12	0	0	0	0	1	0	0	0	0	0	0	0	5	3	4	3	5	5	5	3	4	3	3	2	1	3	3	1	2	1
[truncated: 7,368 more rows]

## Sheet: legend
	country	bio-nonbio	course	sex	bio classes	interest bio	meaning evo	learn evo	denomination	denom summarized	KAEVO A1	KAEVO A2	KAEVO A3	KAEVO A4	KAEVO A5	KAEVO A6	KAEVO A7	KAEVO A8	KAEVO A9.1	KAEVO A9.2	KAEVO A10	KAEVO A11	ATEVO E1	ATEVO E2	ATEVO E3	ATEVO E4	ATEVO E5	ATEVO E6	ATEVO E7	ATEVO E8	PERF F1	PERF F2	PERF F3	PERF F4	PERF F5	PERF F6	PERF F7	PERF F8	PERF F9	PERF F10	KAEVO (0-12)	ATEVO (8-40)	ATEVO-EG (4-20)	ATEVO-EM (4-20)	PERF (10-50)	KAEVO percent	ATEVO percent	ATEVO-EG percent	ATEVO-EM percent
0										I do not want to answer this question.	wrong answer	wrong answer	wrong answer	wrong answer	wrong answer	wrong answer	wrong answer	wrong answer	wrong answer	wrong answer	wrong answer	wrong answer
1	Austria	bio	see beyond	male	I had no biology classes at school.	very low	other	yes	Protestant	Protestant	correct answer	correct answer	correct answer	correct answer	correct answer	correct answer	correct answer	correct answer	correct answer	correct answer	correct answer	correct answer	disagree	disagree	disagree	disagree	disagree	disagree	disagree	disagree	disagree	disagree	disagree	disagree	disagree	disagree	disagree	disagree	disagree	disagree
2	Belgium	nonbio		female	until more than 4 years before graduation	low	no	no	Christian free churches	Christian free churches													somewhat disagree	somewhat disagree	somewhat disagree	somewhat disagree	somewhat disagree	somewhat disagree	somewhat disagree	somewhat disagree	somewhat disagree	somewhat disagree	somewhat disagree	somewhat disagree	somewhat disagree	somewhat disagree	somewhat disagree	somewhat disagree	somewhat disagree	somewhat disagree
3	Bosnia and Herzegovina			other	until 3-4 years before graduation	rather low	thereabout	I do not know.	Catholic	Catholic													undecided	undecided	undecided	undecided	undecided	undecided	undecided	undecided	undecided	undecided	undecided	undecided	undecided	undecided	undecided	undecided	undecided	undecided
4	Bulgaria				until 1-2 years before graduation	medium	only in parts		Orthodox	Orthodox													somewhat agree	somewhat agree	somewhat agree	somewhat agree	somewhat agree	somewhat agree	somewhat agree	somewhat agree	somewhat agree	somewhat agree	somewhat agree	somewhat agree	somewhat agree	somewhat agree	somewhat agree	somewhat agree	somewhat agree	somewhat agree
5	Croatia				until graduation	rather high	yes		Jewish	Muslim													agree	agree	agree	agree	agree	agree	agree	agree	agree	agree	agree	agree	agree	agree	agree	agree	agree	agree
6	Cyprus					high			Muslim (Sunni)
7	Czech Republic					very high			Muslim (Alevi)
8	Finland								Muslim (Shiite)
9	France								Hindu
10	Germany								Buddhist
11	Greece								none	none
12	Hungary								other	other
13	Italy								I do not want to answer this question.
14	Latvia
15	Macedonia
16	Netherlands
17	Poland
18	Portugal
19	Romania
20	Serbia
21	Slovakia
22	Slovenia
23	Spain
24	Sweden
25	Switzerland
26	Turkey
27	Ukraine
99	missing	missing	missing	missing	missing	missing	missing	missing	missing	missing	missing	missing	missing	missing	missing	missing	missing	missing	missing	missing	missing	missing	missing	missing	missing	missing	missing	missing	missing	missing	missing	missing	missing	missing	missing	missing	missing	missing	missing	missing	missing	missing	missing	missing	missing
999																																														missing	missing	missing	missing
course	courses with consecutive numbers (transnationally)
	1	Bio Bachelor JLU
	2	Anglistik JLU
	3	Primary education (democritus university of Thrace)
	4	Primary education Group A (university da coruna)
	5	Primary education Group B (university da coruna)
	6	Infant education (university da coruna)
	7	Human biology (Trnava university - state university)
	8	Social Science (University of Osijek)
	9	Biology (University of Osijek)
	10	Biotechnology (University of Verona, state)
	11	Comparative, European and International Legal Studies (University of Trento)
	12	Agrarwissenschaften (University of Udine)
	13	Wissenschaft der Umwelt und Natur (university of Udine)
	14	(Charles University of Prague - state university) registration days	course 14-18 eigentlich ein Kurs
	15	(Charles University of Prague - state university) reg days 2
	16	(Charles University of Prague - state university) reg days 3
	17	(Charles University of Prague - state university) reg days 4
	18	(Charles University of Prague - state university) reg days 5
	19	(university of Pilsen - state university) Human biology; Biology of the child; Health prevention 1	coure 19 und 20 eigentlich ein Kurs
	20	(university of Pilsen - state university) 2
	21	(Palacký university Olomovc - state university)
	22	(Jan Evangelista Purkyne university - state university) 1
	23	(Jan Evangelista Purkyne university - state university) 2
	24	natural and environmental science (university of Parma) --> general Zoology
	25	initial teacher training (Escola Superior de Educação de Santarém)
	26	pedagogical specialties (university of Latvia) --> biology
	27	Pre-school education teacher programme (university of Latvia)
	28	Sarajevo (university of Sarajevo) mixed
	29	Molekularbiologie (Universität Graz)
	30	Primary Education Science (university of Urbino)
	31	Geology and Natural Science (university of Camerino)
	32	Biology (university of Camerino)
	33	Accounting (academy of economics Bucharest)
	34	Marketing (academy of economics Bucharest)
	35	nursing college (university of Bucharest)
	36	diverse (Babeș-Bolyai University Cluj Napoca)
	37	Educação Básica (educators/teachers from kindergarten till 6th grade) (Escola Superior de Educação de Porto)
	38	Biomedizin/Veterinärmedizin (university of Antwerp)
	39	Politics and Social sciences Bachelor (university of Antwerp)	course 39-41: manche mit upper secondary in NL --> country zu NL geändert
	40	Biologie en Biochemie (university of Antwerp)
	41	Bauwissenschaften (faculty of engineering technology, Geel)
	42	university of Ljubljana (faculty of education)
	43	university of Maribor (faculty of education)
	44	university of Maribor (faculty of natural science and mathematics)
	45	Vistula University Warsaw (Ukrainian students in management etc.)
	46	Vistula University Warsaw Turkish students in management etc.)
	47	university of Nicosia (human biology)
	48	Lucian Blaga University in Sibiu (biology, ecology and environmental protection)
	49	University of Poitiers (Life sciences)
	50	university of Salzburg (introduction course biology education (teachers))
	51	university Salamanca (medicine)
	52	University Complutense (UCM) of Madrid (Veterinary Medicine and attend lectures on Biochemistry and Molecular Biology )
	53	Mostar University (speech therapists)
	54	Banja Luka University (social sciences (elementary school teachers 6-11 y.o.))
	55	Banja Luka University (social sciences (preschool teachers))
	56	Banja Luka University (social sciences (psychology))
	57	Banja Luka University (Faculty of natural sciences (med school) )
	58	Banja Luka University (Faculty of natural sciences (geography))
	59	Banja Luka University (Faculty of natural sciences (ecology))
	60	Banja Luka University (Faculty of natural sciences (maths))
	61	Banja Luka University (Faculty of natural sciences (biology))
	62	Åbo Akademi (biology majors, teachers, environmental studies)
	63	university of Helsinki, swedish speaking (biology majors, teachers, environmental studies)
	64	university of Helsinki (biology majors, teachers, environmental studies)
	65	University of Eastern Finland (biology majors, teachers, environmental studies)
	66	University of Jyväskylä (biology majors, teachers, environmental studies)
	67	university of Turku (biology majors, teachers, environmental studies)
	68	University of Oulu (biology majors, teachers, environmental studies)
	69	Sofia university (Faculty of Biology (general biology and biotechnology))
	70	West South University Blagoevgrad (Social and Humanity Faculty (social policy))
	71	Leiden university (biology)
	72	University of Zagreb (Stomatology)
	73	University of Zagreb (medicine (in English))
	74	University of Zagreb (medicine (in Croatian))
	75	University of Zagreb (biology)
	76	University of Split (biology)
	77	University of Split (medicine (in Croatian))
	78	University of Zagreb (agronomy (agroecology))
	79	university of Athens (pre-service teachers)
	80	biology (Universität Alexandru Ioan Cuza of Iași)
	81	biology (Vasile Alecsandri University of Bacau)
	82	Biology (program: Biotechnology Agronomy Sciences) (university of Zaragoza)	Rest von Kurs 138
	83	biology (university of Vigo)
	84	pre-service biology teachers (faculty of Natural Science and Mathematics, university of Ljubljana)
	85	biology bachelor (university of Wageningen)
	86	biology (university of Coimbra)
	87	various teacher programs (primary and secondary), engineers, and science (biology) (Karlstad University)
	95	anglistic and philology (university of Bielsko-Biaka)
	96	biology (university of Sofia)
	97	kindergarden (university of Cyprus)
	98	biology (university of Cyprus)
	99	Biologie (university of Vienna)
	100	tourism (university of Novi Sad)
	101	gemischt (Universität Braunschweig)
	102	Biologie (Bergische Universität Wuppertal)
	103	gemischt (Pädagogische Hochschule Schwäbisch-Gmünd)
	104	Biologie (Friedrich-Schiller-Universität Jena)
	105	gemischt (Universität Vechta)
	106	Vetmed (JLU Gießen)
	107	Geographiedidaktik (JLU Gießen)
	108	Lineare Algebra L3 (JLU Gießen)
	109	außerschulische Bildung (JLU Gießen)
	110	Biologiedidaktik (JLU Gießen)
	111	Mathe Bachelor (JLU Gießen)
	112	Germanistik (JLU Gießen)
	113	Einführung in die Chemie (Uni Landau)
	114	faculties of Biology, Chemistry, Physics, Artes Liberales, Geology (University of Warsaw)
	115	preschool Elementary Pedagogy (University of Trnava)
	116	biological sciences (University of Bologna)
	117	natural sciences (University of Bologna)
	118	science & technical psychology (University of Palermo)
	119	History of Philosophy (University of Padova)
	120	fundamental biology (University of Padova)
	121	Biologie (University of Belgrade)
	122	Psychologie (University of Belgrade)
	123	unknown course 3 (University of Belgrade)
	124	biology (university of Amsterdam)
	125	mixed (university of Debrecen)
	126	Geography and History (Babeș-Bolyai University Cluj Napoca)
	127	initial teacher training 2019? (Escola Superior de Educação de Santarém)
	128	Pre-school education teacher programme (university of Latvia)
	129	environmental biology (Hacettepe university Ankara)
	130	chemical processing engineering & few from biochemical engineering (faculty of technology; university of Novi Sad)
	131	bachelor of science in biology (faculty of science; university of Novi Sad)
	132	bachelor of science in ecology (faculty of science; university of Novi Sad)
	133	pharmacy (faculty of medicine; university of Novi Sad)
	134	Pre-school education teacher programme (university of Latvia)
	135	biology (university of Geneva)
	136	Chemical Principles of Biology (program: Biology) (university of Seville)
	137	Developmental Biology (program: Health and Life Sciences) (Pompeu Fabra university Barcelona)
	138	Biology (program: Biotechnology Agronomy Sciences) (university of Zaragoza)
	139	Genetic Basics and Human Genetics (program: Biochemistry) (university of Malaga)
	140	biology bachelor (university of Vienna)
	141	biology, molecular biology, ecology (university of Belgrade)
	142	biology, ecology (faculty of science) (university of Novi Sad)
	143	mathematics, informatics (department of mathematics and informatics, university of Kragujevac)
	144	biology, ecology (department of biology and ecology, university of Kragujevac)
	145	electrical and computer engineering (school of electrical engineering) (university of Belgrade)
	146	geodesy (faculty of civil engineering, university of Belgrade)
	147	biology (faculty of science & mathematics, department of biology & ecology, university of Niš)
	148	mathematics (faculty of science & mathematics, department of mathematics, university of Niš)
	149	faculty of biology (university of Belgrade)
	150	biology related (Uşak university)
	151	biology (university Paris-Diderot and University of East Paris (UPEC)
	152	biology (university of Montpellier)
	153	tourism (university of Novi Sad)
	154	agronomy (cattle breeding) (university of Novi Sad)
	155	agronomy (veterinary medicine) (university of Novi Sad)
	156	pedagogy (university of Novi Sad)
	157	psychology (university of Novi Sad)
	158	sociology (university of Novi Sad)
	159	social work (university of Novi Sad)
	160	biology (university of Debrecen)
	161	education (university of Granada)
	162	biology (university of Budapest)
[truncated: 1 more columns]
